# Supplementary material for: Synthesis of functionalized 3,2′-pyrrolidinyl spirooxindoles via domino 1,6-addition/annulation reactions of para-quinone methides and 3-chlorooxindoles
Source: Royal Society of Chemistry journal article supplement (doi:10.1039/d1qo01605a), 2021-12-20

## Supporting Information

### Content

|                                                            |       |
|------------------------------------------------------------|-------|
| 1. General methods .....                                   | 2     |
| 2. Experimental procedures and characterization data ..... | 2-28  |
| 3. Reference .....                                         | 28    |
| 4. Crystallographic data of 3ja .....                      | 29-30 |
| 5. Copies of NMR spectra .....                             | 31-72 |

## 1. General methods

Unless otherwise mentioned, all reagents were purchased from commercial suppliers without further purification. Solvent purification was conducted according to Purification of Laboratory Chemicals (Peerrin, D. D.; Armarego, W. L. and Perrins, D. R., Pergamon Press: Oxford, 1980). Reactions were monitored using Merck Kieselgel 60F<sub>254</sub> aluminium plates. TLC was visualized by UV fluorescence (254 nm) then one of the following: KMnO<sub>4</sub>, phosphomolybdic acid, ninhydrin, *p*-anisaldehyde, vanillin. The Displacement ellipsoids are scaled to the 30% probability level. If not specially mentioned, flash column chromatography was performed using Yantai xinnuo Chemicals (China) (particle size 0.040–0.063 mm). NMR spectra were recorded on JEOL 400 instruments and calibrated by using residual undeuterated chloroform-d ( $\delta$  <sup>1</sup>H = 7.26 ppm,  $\delta$  <sup>13</sup>C = 77.0 ppm) and residual undeuterated dimethyl sulfoxide-d<sub>6</sub> ( $\delta$  <sup>1</sup>H = 2.54 ppm,  $\delta$  <sup>13</sup>C = 40.0 ppm) as internal references. The following abbreviations were used to explain the multiplicities: s = singlet, d = doublet, t = triplet, q = quartet, b = broad, td = triple doublet, dt = double triplet, dq = double quartet, m = multiplet. Infrared (IR) spectra were recorded on an iCAN 9-T FT-IR spectrometer. High-resolution mass spectra (HRMS) were recorded on a Thermo Fisher Q Exactive Orbitrap mass spectrometer using ESI (electrospray ionization) as ionization method. *Para*-quinone methide **1**<sup>[1]</sup> and 3-chlorooxindoles **2**<sup>[2]</sup> were synthesized according to the literature methods.

## 2. Experimental procedures and characterization data

### Procedure for synthesis of **3**

Typical Procedure: To a stirred solution of *para*-quinone methides (0.15 mmol, 1.5 equiv) and 3-chlorooxindoles (0.1 mmol, 1 equiv) in CH<sub>3</sub>Cl (1.0 mL) was added TMG (0.25 mmol, 2.5 equiv) at -20 °C. The reaction was stirred at -20 °C for 30 min. The reaction mixture was directly charged to column chromatography on silica gel (PE:DCM:EA = 30:1:1-10:1:1) to give the cycloadduct.

### 3-(3,5-di-*tert*-butyl-4-hydroxyphenyl)-1'-methyl-1-tosyl-2,3'-spirobi[indolin]-2'-one (**3aa**)

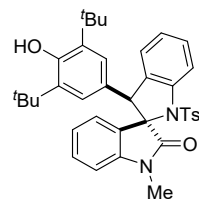

Red solid, isolated yield 94% (64 mg);

dr > 19:1;

mp: 242.0-242.9 °C;

<sup>1</sup>H NMR (400 MHz, CDCl<sub>3</sub>):  $\delta$  8.03 (d, *J* = 8.3 Hz, 2H), 7.27 (d, *J* = 8.5 Hz, 3H), 7.24-7.20 (m, 1H), 7.15 (d, *J* = 7.4 Hz, 1H), 7.06-7.01 (m, 2H), 6.84 (d, *J* = 7.3 Hz, 1H), 6.74-6.70 (m, 3H), 6.48 (d, *J* = 7.8 Hz, 1H), 5.15 (s, 1H), 5.00 (s, 1H), 3.20 (s, 3H), 2.40 (s, 3H), 1.25 (s, 18H);

<sup>13</sup>C NMR (101 MHz, CDCl<sub>3</sub>):  $\delta$  175.7, 153.1, 144.1, 142.3, 141.7, 136.4, 135.1, 130.2, 129.5, 129.3, 128.4, 128.3, 126.8, 125.8, 125.3, 123.9, 123.4, 122.8, 121.9, 112.4, 107.9, 78.5, 59.0, 34.0, 30.1, 26.5, 21.6;

IR (neat):  $\nu$  3855, 2923, 1719, 1560, 1458, 1349, 1259, 1167, 1091, 749  $\text{cm}^{-1}$ ;

HRMS (ESI):  $m/z$   $[M - H]^+$  calcd. for  $\text{C}_{37}\text{H}_{39}\text{N}_2\text{O}_4\text{S}$ : 607.2636; found: 607.2635.

**3-(3,5-di-*tert*-butyl-4-hydroxyphenyl)-1',5-dimethyl-1-tosyl-2,3'-spirobi[indolin]-2'-one (3ba)**

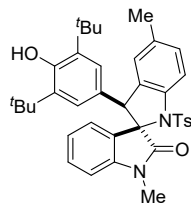

White solid, isolated yield 94% (80 mg);

dr > 19:1;

mp: 288.9-289.7  $^{\circ}\text{C}$ ;

$^1\text{H}$  NMR (400 MHz,  $\text{CDCl}_3$ ):  $\delta$  8.01 (d,  $J = 8.1$  Hz, 2H), 7.27-7.25 (m, 2H), 7.17 (d,  $J = 8.1$  Hz, 1H), 7.06-6.98 (m, 3H), 6.85 (d,  $J = 7.3$  Hz, 1H), 6.74-6.70 (m, 3H), 6.48 (d,  $J = 7.8$  Hz, 1H), 5.12 (s, 1H), 5.01 (s, 1H), 3.19 (s, 3H), 2.39 (s, 3H), 2.27 (s, 3H), 1.25 (s, 18H);

$^{13}\text{C}$  NMR (101 MHz,  $\text{CDCl}_3$ ):  $\delta$  175.6, 153.1, 144.0, 141.7, 140.0, 136.5, 135.0, 132.5, 130.3, 129.5, 129.2, 128.6, 128.3, 126.8, 126.0, 125.8, 123.9, 123.5, 121.6, 112.0, 107.8, 78.5, 59.0, 34.0, 30.1, 26.5, 21.6, 20.8;

IR (neat):  $\nu$  3789, 2960, 1726, 1613, 1438, 1347, 1165, 1050, 809, 750  $\text{cm}^{-1}$ ;

HRMS (ESI):  $m/z$   $[M - H]^+$  calcd. for  $\text{C}_{38}\text{H}_{41}\text{N}_2\text{O}_4\text{S}$ : 621.2793; found: 621.2788.

**3-(3,5-di-*tert*-butyl-4-hydroxyphenyl)-5-fluoro-1'-methyl-1-tosyl-2,3'-spirobi[indolin]-2'-one (3ca)**

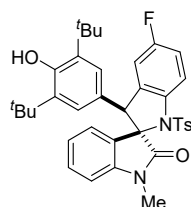

White solid, isolated yield 84% (52 mg);

dr > 19:1;

mp: 262.8-263.7  $^{\circ}\text{C}$ ;

$^1\text{H}$  NMR (400 MHz,  $\text{CDCl}_3$ ):  $\delta$  7.99 (d,  $J = 8.3$  Hz, 2H), 7.29-7.26 (m, 2H), 7.21 (dd,  $J = 8.7, 4.2$  Hz, 1H), 7.06 (t,  $J = 7.6$  Hz, 1H), 6.94-6.84 (m, 3H), 6.77-6.71 (m, 3H), 6.49 (d,  $J = 7.8$  Hz, 1H), 5.11 (s, 1H), 5.02 (s, 1H), 3.19 (s, 3H), 2.40 (s, 3H), 1.25 (s, 18H);

$^{13}\text{C}$  NMR (101 MHz,  $\text{CDCl}_3$ ):  $\delta$  175.3, 160.3 (d,  $J_{\text{C-F}} = 240.4$  Hz), 153.3, 144.3, 141.7, 138.3, 136.3, 135.3, 132.6 (d,  $J_{\text{C-F}} = 8.0$  Hz), 129.6, 129.4, 128.3, 126.6, 125.7, 123.9, 122.8, 122.0, 114.8 (d,  $J_{\text{C-F}} = 23.5$  Hz), 113.0 (d,  $J_{\text{C-F}} = 1.2$  Hz), 112.9 (d,  $J_{\text{C-F}} = 14.6$  Hz), 108.0, 78.9, 58.8, 34.0, 30.1, 26.5, 21.6;

IR (neat):  $\nu$  3857, 2920, 1725, 1612, 1440, 1351, 1261, 1165, 1090, 1022, 750  $\text{cm}^{-1}$ ;

HRMS (ESI):  $m/z$   $[M - H]^+$  calcd. for  $C_{37}H_{38}FN_2O_4S$ : 625.2542; found: 625.2541.

**5-chloro-3-(3,5-di-*tert*-butyl-4-hydroxyphenyl)-1'-methyl-1-tosyl-2,3'-spirobi[indolin]-2'-one (3da)**

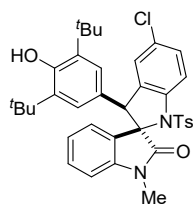

Red solid, isolated yield >99% (70 mg);

dr > 19:1;

mp: 295.2-296.0 °C;

$^1H$  NMR (400 MHz,  $CDCl_3$ ):  $\delta$  7.99 (d,  $J = 8.4$  Hz, 2H), 7.28-7.26 (m, 2H), 7.21-7.20 (m, 2H), 7.14-7.13 (m, 1H), 7.06 (td,  $J = 7.8, 1.2$  Hz, 1H), 6.85 (d,  $J = 7.3$  Hz, 1H), 6.75 (t,  $J = 7.4$  Hz, 1H), 6.71 (s, 2H), 6.50 (d,  $J = 7.8$  Hz, 1H), 5.11 (s, 1H), 5.04 (s, 1H), 3.19 (s, 3H), 2.40 (s, 3H), 1.25 (s, 18H);

$^{13}C$  NMR (101 MHz,  $CDCl_3$ ):  $\delta$  175.2, 153.3, 144.4, 141.6, 140.9, 136.0, 135.2, 132.4, 129.6, 129.5, 128.3, 128.23, 128.19, 126.3, 125.7, 125.4, 123.8, 122.6, 122.0, 113.2, 108.0, 78.8, 58.8, 34.0, 30.0, 26.5, 21.6;

IR (neat):  $\nu$  3790, 2923, 1726, 1612, 1468, 1441, 1357, 1165, 749  $cm^{-1}$ ;

HRMS (ESI):  $m/z$   $[M - H]^+$  calcd. for  $C_{37}H_{38}ClN_2O_4S$ : 641.2246; found: 641.2244.

**5-bromo-3-(3,5-di-*tert*-butyl-4-hydroxyphenyl)-1'-methyl-1-tosyl-2,3'-spirobi[indolin]-2'-one (3ea)**

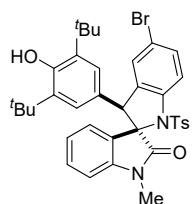

Red solid, isolated yield >99% (82 mg);

dr > 19:1;

mp: 293.2-294.1 °C;

$^1H$  NMR (400 MHz,  $CDCl_3$ ):  $\delta$  7.99 (d,  $J = 8.3$  Hz, 2H), 7.34 (d,  $J = 8.6$  Hz, 1H), 7.29-7.26 (m, 3H), 7.16 (d,  $J = 8.5$  Hz, 1H), 7.06 (td,  $J = 7.7, 1.2$  Hz, 1H), 6.85 (d,  $J = 7.3$  Hz, 1H), 6.75 (t,  $J = 7.5$  Hz, 1H), 6.70 (s, 2H), 6.50 (d,  $J = 7.8$  Hz, 1H), 5.12 (s, 1H), 5.04 (s, 1H), 3.19 (s, 3H), 2.40 (s, 3H), 1.25 (s, 18H);

$^{13}\text{C}$  NMR (101 MHz,  $\text{CDCl}_3$ ):  $\delta$  175.2, 153.3, 144.4, 141.7, 141.5, 136.0, 135.3, 132.8, 131.1, 129.6, 129.5, 128.31, 128.30, 126.4, 125.7, 123.8, 122.6, 122.0, 115.5, 113.7, 108.0, 78.7, 58.8, 34.0, 30.1, 26.5, 21.6;

IR (neat):  $\nu$  3638, 2956, 1727, 1613, 1468, 1350, 1164, 1091, 1022, 806, 749  $\text{cm}^{-1}$ ;

HRMS (ESI):  $m/z$   $[\text{M} - \text{H}]^+$  calcd. for  $\text{C}_{37}\text{H}_{38}\text{BrN}_2\text{O}_4\text{S}$ : 685.1741; found: 685.1737.

### 3-(3,5-di-*tert*-butyl-4-hydroxyphenyl)-1',6-dimethyl-1-tosyl-2,3'-spirobi[indolin]-2'-one (3fa)

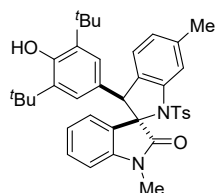

Red solid, isolated yield 90% (56 mg);

dr > 19:1;

mp: 267.9-268.8  $^{\circ}\text{C}$ ;

$^1\text{H}$  NMR (400 MHz,  $\text{CDCl}_3$ ):  $\delta$  8.03 (d,  $J$  = 8.1 Hz, 2H), 7.28-7.26 (m, 2H), 7.10 (s, 1H), 7.05-7.01 (m, 2H), 6.84 (t,  $J$  = 7.2 Hz, 2H), 6.74-6.70 (m, 3H), 6.47 (d,  $J$  = 7.8 Hz, 1H), 5.10 (s, 1H), 4.99 (s, 1H), 3.19 (s, 3H), 2.40 (s, 3H), 2.35 (s, 3H), 1.24 (s, 18H);

$^{13}\text{C}$  NMR (101 MHz,  $\text{CDCl}_3$ ):  $\delta$  175.7, 153.1, 144.0, 142.5, 141.7, 138.4, 136.5, 135.0, 129.50, 129.49, 129.2, 128.3, 127.3, 126.9, 125.7, 125.0, 123.9, 123.6, 121.9, 113.2, 107.8, 78.7, 58.7, 34.0, 30.1, 26.5, 21.8, 21.6;

IR (neat):  $\nu$  3855, 3650, 2959, 1792, 1718, 1654, 1559, 1507, 1256, 1092, 749  $\text{cm}^{-1}$ ;

HRMS (ESI):  $m/z$   $[\text{M} - \text{H}]^+$  calcd. for  $\text{C}_{38}\text{H}_{41}\text{N}_2\text{O}_4\text{S}$ : 621.2793; found: 621.2791.

### 3-(3,5-di-*tert*-butyl-4-hydroxyphenyl)-1'-methyl-1-tosyl-6-(trifluoromethyl)-2,3'-spirobi[indolin]-2'-one (3ga)

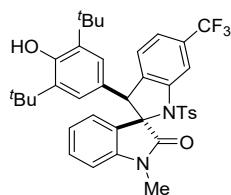

White solid, isolated yield 98% (66 mg);

dr > 19:1;

mp: 303.4-304.3  $^{\circ}\text{C}$ ;

$^1\text{H}$  NMR (400 MHz,  $\text{CDCl}_3$ ):  $\delta$  7.99 (d,  $J$  = 8.1 Hz, 2H), 7.53 (s, 1H), 7.30-7.23 (m, 4H), 7.08 (t,  $J$  = 7.6 Hz, 1H), 6.81 (d,  $J$  = 7.2 Hz, 1H), 6.75 (t,  $J$  = 7.4 Hz, 1H), 6.70 (s, 2H), 6.51 (d,  $J$  = 7.8 Hz, 1H), 5.14 (s, 1H), 5.04 (s, 1H), 3.21 (s, 3H), 2.41 (s, 3H), 1.25 (s, 18H);

$^{13}\text{C}$  NMR (101 MHz,  $\text{CDCl}_3$ ):  $\delta$  175.2, 153.4, 144.7, 142.8, 141.7, 135.8, 135.3, 134.5, 131.0 (q,  $J_{\text{C-F}} = 32.2$  Hz), 129.7, 129.6, 129.5 (q,  $J_{\text{C-F}} = 202.4$  Hz), 128.3, 126.2, 125.7, 125.4, 123.9, 122.6, 122.1, 120.1 (q,  $J_{\text{C-F}} = 4.2$  Hz), 109.1 (q,  $J_{\text{C-F}} = 4.0$  Hz), 108.1, 78.9, 58.8, 34.0, 30.1, 26.6, 21.6;

IR (neat):  $\nu$  3855, 3752, 2921, 1720, 1655, 1431, 1317, 1047, 750, 669  $\text{cm}^{-1}$ ;

HRMS (ESI):  $m/z$   $[\text{M} - \text{H}]^+$  calcd. for  $\text{C}_{38}\text{H}_{38}\text{F}_3\text{N}_2\text{O}_4\text{S}$ : 675.2510; found: 675.2509.

**3-(3,5-di-*tert*-butyl-4-hydroxyphenyl)-6-fluoro-1'-methyl-1-tosyl-2,3'-spirobi[indolin]-2'-one (3ha)**

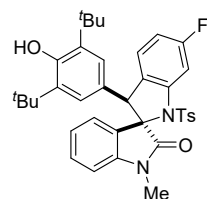

White solid, isolated yield >99% (68 mg);

dr > 19:1;

mp: 254.3-255.2  $^{\circ}\text{C}$ ;

$^1\text{H}$  NMR (400 MHz,  $\text{CDCl}_3$ ):  $\delta$  8.00 (d,  $J = 8.2$  Hz, 2H), 7.29 (d,  $J = 8.0$  Hz, 2H), 7.08-7.02 (m, 3H), 6.84 (d,  $J = 7.2$  Hz, 1H), 6.76-6.71 (m, 4H), 6.49 (d,  $J = 7.8$  Hz, 1H), 5.08 (s, 1H), 5.01 (s, 1H), 3.20 (s, 3H), 2.41 (s, 3H), 1.24 (s, 18H);

$^{13}\text{C}$  NMR (101 MHz,  $\text{CDCl}_3$ ):  $\delta$  175.3, 164.1 (d,  $J_{\text{C-F}} = 243.2$  Hz), 153.2, 144.5, 143.6 (d,  $J_{\text{C-F}} = 11.7$  Hz), 141.7, 136.0, 135.2, 129.6, 129.4, 128.3, 126.5, 126.0 (d,  $J_{\text{C-F}} = 9.8$  Hz), 125.7 (d,  $J_{\text{C-F}} = 2.6$  Hz), 125.6, 123.9, 123.2, 122.0, 109.4 (d,  $J_{\text{C-F}} = 22.6$  Hz), 107.9, 101.3 (d,  $J_{\text{C-F}} = 28.9$  Hz), 79.1, 58.3, 34.0, 30.1, 26.5, 21.6;

IR (neat):  $\nu$  3855, 2917, 1725, 1612, 1491, 1438, 1355, 1255, 1163, 1091, 750  $\text{cm}^{-1}$ ;

HRMS (ESI):  $m/z$   $[\text{M} - \text{H}]^+$  calcd. for  $\text{C}_{37}\text{H}_{38}\text{FN}_2\text{O}_4\text{S}$ : 625.2542; found: 625.2537.

**6-chloro-3-(3,5-di-*tert*-butyl-4-hydroxyphenyl)-1'-methyl-1-tosyl-2,3'-spirobi[indolin]-2'-one (3ia)**

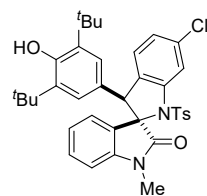

White solid, isolated yield 96% (42 mg);

dr > 19:1;

mp: 285.4-286.3  $^{\circ}\text{C}$ ;

<sup>1</sup>H NMR (400 MHz, CDCl<sub>3</sub>): δ 8.00 (d, *J* = 8.1 Hz, 2H), 7.31-7.26 (m, 3H), 7.08-6.99 (m, 3H), 6.84 (d, *J* = 7.3 Hz, 1H), 6.75 (t, *J* = 7.5 Hz, 1H), 6.70 (s, 2H), 6.49 (d, *J* = 7.8 Hz, 1H), 5.07 (s, 1H), 5.02 (s, 1H), 3.19 (s, 3H), 2.42 (s, 3H), 1.24 (s, 18H);

<sup>13</sup>C NMR (101 MHz, CDCl<sub>3</sub>): δ 175.2, 153.2, 144.5, 143.4, 141.7, 136.0, 135.2, 133.9, 129.7, 129.5, 129.0, 128.3, 126.5, 126.0, 125.6, 123.9, 122.91, 122.90, 122.0, 112.9, 108.0, 78.9, 58.5, 34.0, 30.1, 26.5, 21.6;

IR (neat): ν 3855, 2922, 1726, 1618, 1474, 1352, 1237, 1166, 1091, 751 cm<sup>-1</sup>;

HRMS (ESI): *m/z* [M - H]<sup>+</sup> calcd. for C<sub>37</sub>H<sub>38</sub>ClN<sub>2</sub>O<sub>4</sub>S: 641.2246; found: 641.2244.

**6-bromo-3-(3,5-di-*tert*-butyl-4-hydroxyphenyl)-1'-methyl-1-tosyl-2,3'-spirobi[indolin]-2'-one (3ja)**

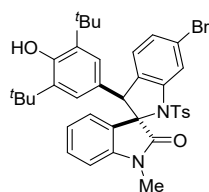

White solid, isolated yield >99% (70 mg);

dr > 19:1;

mp: 293.2-294.0 °C;

<sup>1</sup>H NMR (400 MHz, CDCl<sub>3</sub>): δ 8.00 (d, *J* = 8.1 Hz, 2H), 7.44 (s, 1H), 7.30 (d, *J* = 8.0 Hz, 2H), 7.16 (d, *J* = 7.9 Hz, 1H), 7.06 (t, *J* = 7.8 Hz, 1H), 7.00 (d, *J* = 7.9 Hz, 1H), 6.84 (d, *J* = 7.3 Hz, 1H), 6.75 (t, *J* = 7.5 Hz, 1H), 6.69 (s, 2H), 6.49 (d, *J* = 7.8 Hz, 1H), 5.05 (s, 1H), 5.02 (s, 1H), 3.19 (s, 3H), 2.42 (s, 3H), 1.24 (s, 18H);

<sup>13</sup>C NMR (101 MHz, CDCl<sub>3</sub>): δ 175.2, 153.3, 144.5, 143.6, 141.6, 136.0, 135.2, 129.7, 129.6, 129.5, 128.3, 126.4, 126.4, 125.9, 125.6, 123.9, 122.8, 122.0, 121.7, 115.7, 108.0, 78.9, 58.6, 34.0, 30.1, 26.5, 21.6;

IR (neat): ν 3776, 2921, 1726, 1659, 1598, 1468, 1352, 1165, 750 cm<sup>-1</sup>;

HRMS (ESI): *m/z* [M - H]<sup>+</sup> calcd. for C<sub>37</sub>H<sub>38</sub>BrN<sub>2</sub>O<sub>4</sub>S: 685.1741; found: 685.1738.

**1-((4-chlorophenyl)sulfonyl)-3-(3,5-di-*tert*-butyl-4-hydroxyphenyl)-1'-methyl-2,3'-spirobi[indolin]-2'-one (3ka)**

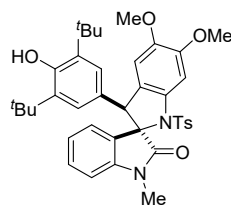

White solid, isolated yield 56% (38 mg);

dr > 19:1;

mp: 232.2-233.0 °C;

<sup>1</sup>H NMR (400 MHz, CDCl<sub>3</sub>): δ 7.96 (d, *J* = 8.3 Hz, 2H), 7.26-7.24 (m, 2H), 7.03 (td, *J* = 7.7, 1.1 Hz, 1H), 6.99 (s, 1H), 6.80 (d, *J* = 7.4 Hz, 1H), 6.75 (s, 2H), 6.71-6.67 (m, 2H), 6.48 (d, *J* = 7.7 Hz, 1H), 5.12 (s, 1H), 5.00 (s, 1H), 3.88 (s, 3H), 3.74 (s, 3H), 3.21 (s, 3H), 2.40 (s, 3H), 1.25 (s, 18H);

<sup>13</sup>C NMR (101 MHz, CDCl<sub>3</sub>): δ 175.5, 153.1, 148.9, 145.1, 144.1, 141.8, 136.7, 135.8, 135.1, 129.5, 129.2, 128.2, 126.7, 125.6, 124.0, 123.9, 121.9, 120.7, 109.0, 107.8, 97.9, 78.5, 58.7, 56.5, 56.1, 34.0, 30.1, 26.5, 21.6;

IR (neat): ν 3650, 2923, 1734, 1718, 1507, 1458, 1340, 1164, 1091, 748 cm<sup>-1</sup>;

HRMS (ESI): *m/z* [M - H]<sup>+</sup> calcd. for C<sub>39</sub>H<sub>43</sub>N<sub>2</sub>O<sub>6</sub>S: 667.2847; found: 667.2846.

**3-(3,5-di-*tert*-butyl-4-hydroxyphenyl)-1'-methyl-1-tosyl-1,3-dihydrospiro[benzo[*f*]indole-2,3'-indolin]-2'-one (3la)**

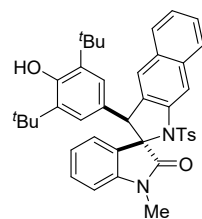

Red solid, isolated yield >99% (72 mg);

dr > 19:1;

mp: 260.8-261.5 °C;

<sup>1</sup>H NMR (400 MHz, CDCl<sub>3</sub>): δ 8.14 (d, *J* = 8.1 Hz, 2H), 7.79 (d, *J* = 8.2 Hz, 1H), 7.68 (d, *J* = 8.0 Hz, 1H), 7.63 (s, 1H), 7.59 (s, 1H), 7.46 (t, *J* = 7.1 Hz, 1H), 7.36 (t, *J* = 7.3 Hz, 1H), 7.29 (d, *J* = 8.1 Hz, 2H), 7.06 (t, *J* = 7.7 Hz, 1H), 6.85-6.83 (m, 3H), 6.74 (t, *J* = 7.5 Hz, 1H), 6.50 (d, *J* = 7.8 Hz, 1H), 5.25 (s, 1H), 5.06 (s, 1H), 3.20 (s, 3H), 2.39 (s, 3H), 1.26 (s, 18H);

<sup>13</sup>C NMR (101 MHz, CDCl<sub>3</sub>): δ 175.2, 153.3, 144.3, 141.7, 140.3, 136.1, 135.2, 133.8, 131.7, 130.3, 129.6, 129.4, 128.4, 127.7, 127.5, 126.9, 126.3, 125.9, 124.6, 124.3, 123.7, 122.9, 122.1, 108.6, 108.0, 78.6, 58.9, 34.1, 30.1, 26.5, 21.6;

IR (neat): ν 3661, 2967, 1725, 1613, 1349, 1241, 1165, 1051, 896, 749 cm<sup>-1</sup>;

HRMS (ESI): *m/z* [M - H]<sup>+</sup> calcd. for C<sub>41</sub>H<sub>41</sub>N<sub>2</sub>O<sub>4</sub>S: 657.2793; found: 657.2789.

**3-(3,5-di-*tert*-butyl-4-hydroxyphenyl)-1'-methyl-1-(phenylsulfonyl)-2,3'-spirobi[indolin]-2'-one (3ma)**



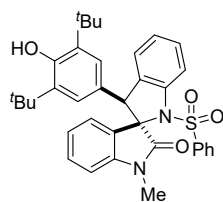

White solid, isolated yield 94% (56 mg);

dr > 19:1;

mp: 198.7-199.3 °C;

<sup>1</sup>H NMR (400 MHz, CDCl<sub>3</sub>): δ 8.15 (d, *J* = 7.6 Hz, 2H), 7.56 (t, *J* = 7.2 Hz, 1H), 7.50-7.47 (m, 2H), 7.30-7.26 (m, 2H), 7.16 (d, *J* = 7.4 Hz, 1H), 7.06-7.02 (m, 2H), 6.83 (d, *J* = 7.3 Hz, 1H), 6.74-6.70 (m, 3H), 6.49 (d, *J* = 7.8 Hz, 1H), 5.16 (s, 1H), 5.00 (s, 1H), 3.21 (s, 3H), 1.25 (s, 18H);

<sup>13</sup>C NMR (101 MHz, CDCl<sub>3</sub>): δ 175.6, 153.1, 142.2, 141.7, 139.4, 135.1, 133.2, 130.3, 129.3, 128.9, 128.32, 128.30, 126.7, 125.7, 125.4, 123.9, 123.3, 123.0, 122.0, 112.4, 107.9, 78.5, 59.0, 34.0, 30.1, 26.5;

IR (neat): ν 3855, 3752, 2961, 1721, 1616, 1474, 1437, 1351, 1166, 1048, 750 cm<sup>-1</sup>;

HRMS (ESI): *m/z* [M - H]<sup>+</sup> calcd. for C<sub>36</sub>H<sub>37</sub>N<sub>2</sub>O<sub>4</sub>S: 593.2480; found: 593.2478.

**3-(3,5-di-*tert*-butyl-4-hydroxyphenyl)-1-((4-fluorophenyl)sulfonyl)-1'-methyl-2,3'-spirobi[indolin]-2'-one (3a)**

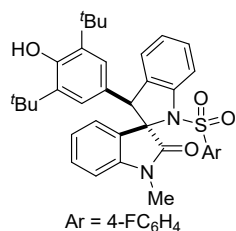

White solid, isolated yield 85% (52 mg);

dr > 19:1;

mp: 223.5-224.2 °C;

<sup>1</sup>H NMR (400 MHz, CDCl<sub>3</sub>): δ 8.19 (dd, *J* = 8.6, 5.1 Hz, 2H), 7.29-7.22 (m, 2H), 7.17-7.13 (m, 3H), 7.05 (t, *J* = 7.4 Hz, 2H), 6.83 (d, *J* = 7.3 Hz, 1H), 6.75-6.72 (m, 3H), 6.50 (d, *J* = 7.8 Hz, 1H), 5.15 (s, 1H), 5.01 (s, 1H), 3.20 (s, 3H), 1.25 (s, 18H);

<sup>13</sup>C NMR (101 MHz, CDCl<sub>3</sub>): δ 175.7, 166.7 (d, *J*<sub>C-F</sub> = 254.3 Hz), 153.2, 142.0, 141.7, 135.4 (d, *J*<sub>C-F</sub> = 3.5 Hz), 135.1, 131.3 (d, *J*<sub>C-F</sub> = 9.6 Hz), 130.3, 129.4, 128.4, 126.7, 125.7, 125.5, 123.8, 123.21, 123.16, 122.0, 116.3 (d, *J*<sub>C-F</sub> = 22.4 Hz), 112.3, 108.0, 78.6, 59.0, 34.0, 30.1, 26.5;

IR (neat): ν 3855, 3650, 2922, 1718, 1654, 1559, 1507, 1458, 1049, 750 cm<sup>-1</sup>;

HRMS (ESI): *m/z* [M - H]<sup>+</sup> calcd. for C<sub>36</sub>H<sub>36</sub>FN<sub>2</sub>O<sub>4</sub>S: 611.2385; found: 611.2383.

**1-((4-chlorophenyl)sulfonyl)-3-(3,5-di-*tert*-butyl-4-hydroxyphenyl)-1'-methyl-2,3'-spirobi[indolin]-2'-one (30a)**

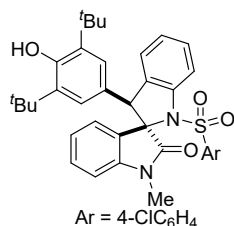

White solid, isolated yield 72% (46 mg);

mp: 214.7-215.6 °C;

dr > 19:1;

<sup>1</sup>H NMR (400 MHz, CDCl<sub>3</sub>): δ 8.08 (d, *J* = 8.8 Hz, 2H), 7.44 (d, *J* = 8.8 Hz, 2H), 7.30-7.26 (m, 2H), 7.17 (d, *J* = 7.2 Hz, 1H), 7.08-7.03 (m, 2H), 6.81 (dd, *J* = 7.4, 0.9 Hz, 1H), 6.75-6.71 (m, 3H), 6.50 (d, *J* = 7.8 Hz, 1H), 5.15 (s, 1H), 5.01 (s, 1H), 3.20 (s, 3H), 1.25 (s, 18H);

<sup>13</sup>C NMR (101 MHz, CDCl<sub>3</sub>): δ 175.6, 153.2, 142.0, 141.7, 139.8, 137.9, 135.2, 130.3, 129.8, 129.4, 129.2, 128.4, 126.7, 125.7, 125.5, 123.8, 123.3, 123.2, 122.0, 112.4, 108.0, 78.5, 59.0, 34.0, 30.1, 26.5;

IR (neat): ν 3752, 2922, 1735, 1654, 1560, 1458, 1437, 1023, 806, 747 cm<sup>-1</sup>;

HRMS (ESI): *m/z* [M - H]<sup>+</sup> calcd. for C<sub>36</sub>H<sub>36</sub>ClN<sub>2</sub>O<sub>4</sub>S: 623.2090; found: 627.2087.

**1-((4-chlorophenyl)sulfonyl)-3-(3,5-di-*tert*-butyl-4-hydroxyphenyl)-1'-methyl-2,3'-spirobi[indolin]-2'-one (3pa)**

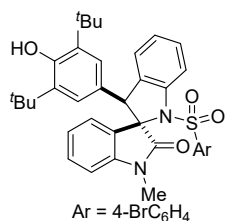

White solid, isolated yield 82% (56 mg);

dr > 19:1;

mp: 243.7-244.5 °C;

<sup>1</sup>H NMR (400 MHz, CDCl<sub>3</sub>): δ 8.00 (d, *J* = 8.8 Hz, 2H), 7.61 (d, *J* = 8.8 Hz, 2H), 7.30-7.23 (m, 2H), 7.17 (d, *J* = 7.1 Hz, 1H), 7.08-7.03 (m, 2H), 6.81 (dd, *J* = 7.4, 0.9 Hz, 1H), 6.74-6.70 (m, 3H), 6.50 (d, *J* = 7.8 Hz, 1H), 5.14 (s, 1H), 5.00 (s, 1H), 3.20 (s, 3H), 1.24 (s, 18H);

<sup>13</sup>C NMR (101 MHz, CDCl<sub>3</sub>): δ 175.5, 153.2, 141.9, 141.7, 138.4, 135.2, 132.2, 130.3, 129.8, 129.4, 128.44, 128.42, 126.6, 125.7, 125.5, 123.8, 123.3, 123.2, 122.0, 112.4, 108.0, 78.5, 59.0, 34.0, 30.1, 26.5;

IR (neat): ν 3650, 2922, 1734, 1717, 1654, 1541, 1458, 1168, 1089, 742 cm<sup>-1</sup>;

HRMS (ESI):  $m/z$   $[M - H]^+$  calcd. for  $C_{36}H_{36}BrN_2O_4S$ : 671.1585; found: 671.1584.

**3-(3,5-di-*tert*-butyl-4-hydroxyphenyl)-1'-((4-methoxyphenyl)sulfonyl)-1'-methyl-2,3'-spirobi[indolin]-2'-one (3qa)**

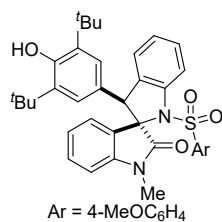

Yellow solid, isolated yield 90% (56 mg);

dr > 19:1;

mp: 216.9-217.7 °C;

<sup>1</sup>H NMR (400 MHz, CDCl<sub>3</sub>):  $\delta$  8.08 (d,  $J$  = 8.9 Hz, 2H), 7.27-7.21 (m, 2H), 7.15 (d,  $J$  = 7.2 Hz, 1H), 7.06-7.00 (m, 2H), 6.94 (d,  $J$  = 8.9 Hz, 2H), 6.84 (d,  $J$  = 7.2 Hz, 1H), 6.74-6.71 (m, 3H), 6.48 (d,  $J$  = 7.8 Hz, 1H), 5.14 (s, 1H), 5.00 (s, 1H), 3.84 (s, 3H), 3.20 (s, 3H), 1.25 (s, 18H);

<sup>13</sup>C NMR (101 MHz, CDCl<sub>3</sub>):  $\delta$  175.8, 163.3, 153.1, 142.3, 141.7, 135.1, 130.9, 130.6, 130.2, 129.3, 128.3, 126.8, 125.7, 125.3, 123.9, 123.4, 122.8, 121.9, 114.0, 112.3, 107.9, 78.5, 59.0, 55.6, 34.0, 30.1, 26.5;

IR (neat):  $\nu$  3855, 3650, 2920, 1718, 1654, 1560, 1458, 1261, 1161, 1028, 750 cm<sup>-1</sup>;

HRMS (ESI):  $m/z$   $[M - H]^+$  calcd. for  $C_{37}H_{39}N_2O_5S$ : 623.2585; found: 623.2584.

**3-(3,5-di-*tert*-butyl-4-hydroxyphenyl)-1'-methyl-1'-((4-(trifluoromethyl)phenyl)sulfonyl)-2,3'-spirobi[indolin]-2'-one (3ra)**

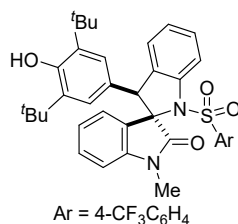

White solid, isolated yield 68% (46 mg);

dr > 19:1;

mp: 207.5-208.4 °C;

<sup>1</sup>H NMR (400 MHz, CDCl<sub>3</sub>):  $\delta$  8.25 (d,  $J$  = 8.2 Hz, 2H), 7.73 (d,  $J$  = 8.4 Hz, 2H), 7.35 (d,  $J$  = 7.9 Hz, 1H), 7.29 (s, 1H), 7.18 (d,  $J$  = 7.4 Hz, 1H), 7.09-7.03 (m, 2H), 6.80-6.65 (m, 4H), 6.51 (d,  $J$  = 7.8 Hz, 1H), 5.16 (s, 1H), 5.01 (s, 1H), 3.21 (s, 3H), 1.24 (s, 18H);

$^{13}\text{C}$  NMR (101 MHz,  $\text{CDCl}_3$ ):  $\delta$  175.4, 153.2, 142.9 (q,  $J_{\text{C-F}} = 31.9$  Hz), 141.8, 141.7, 135.2, 130.4, 129.5, 128.8, 128.7, 128.5, 128.0, 126.6, 126.0 (q,  $J_{\text{C-F}} = 3.9$  Hz), 125.7, 125.6 (q,  $J_{\text{C-F}} = 271.1$  Hz), 123.8, 123.5, 123.1, 122.0, 112.4, 108.0, 78.5, 59.0, 34.1, 30.1, 26.6;

IR (neat):  $\nu$  3855, 3650, 2922, 1720, 1654, 1580, 1560, 1455, 1260, 1165, 1028, 750  $\text{cm}^{-1}$ ;

HRMS (ESI):  $m/z$   $[\text{M} - \text{H}]^+$  calcd. for  $\text{C}_{37}\text{H}_{36}\text{F}_3\text{N}_2\text{O}_4\text{S}$ : 661.2353; found: 661.2351.

**3-(3,5-di-*tert*-butyl-4-hydroxyphenyl)-1'-methyl-1-(naphthalen-2-ylsulfonyl)-2,3'-spirobi[indolin]-2'-one (3sa)**

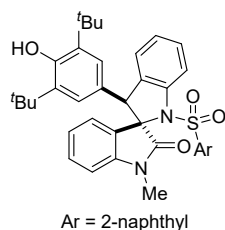

White solid, isolated yield 80% (54 mg);

dr > 19:1;

mp: 248.0-248.8  $^{\circ}\text{C}$ ;

$^1\text{H}$  NMR (400 MHz,  $\text{CDCl}_3$ ):  $\delta$  8.57 (d,  $J = 1.6$  Hz, 1H), 8.24 (dd,  $J = 8.7, 1.9$  Hz, 1H), 7.97-7.92 (m, 2H), 7.88 (d,  $J = 8.0$  Hz, 1H), 7.65-7.56 (m, 2H), 7.36 (d,  $J = 8.0$  Hz, 1H), 7.21 (t,  $J = 7.9$  Hz, 1H), 7.15 (d,  $J = 7.5$  Hz, 1H), 7.06-7.00 (m, 2H), 6.81 (d,  $J = 7.9$  Hz, 1H), 6.75 (s, 2H), 6.66 (t,  $J = 7.0$  Hz, 1H), 6.52 (d,  $J = 7.8$  Hz, 1H), 5.19 (s, 1H), 5.00 (s, 1H), 3.24 (s, 3H), 1.25 (s, 18H);

$^{13}\text{C}$  NMR (101 MHz,  $\text{CDCl}_3$ ):  $\delta$  175.7, 153.1, 142.3, 141.8, 136.2, 135.14, 135.12, 131.9, 130.3, 130.0, 129.6, 129.4, 129.3, 129.0, 128.3, 127.8, 127.2, 126.6, 125.9, 125.8, 125.4, 124.0, 123.4, 123.0, 121.9, 112.4, 107.9, 78.5, 59.0, 34.0, 30.1, 26.6;

IR (neat):  $\nu$  2920, 1734, 1654, 1559, 1473, 1458, 1341, 1165, 1029, 747  $\text{cm}^{-1}$ ;

HRMS (ESI):  $m/z$   $[\text{M} - \text{H}]^+$  calcd. for  $\text{C}_{40}\text{H}_{39}\text{N}_2\text{O}_4\text{S}$ : 643.2636; found: 643.2635.

**3-(3,5-di-*tert*-butyl-4-hydroxyphenyl)-1',4'-dimethyl-1-tosyl-2,3'-spirobi[indolin]-2'-one (3ab)**

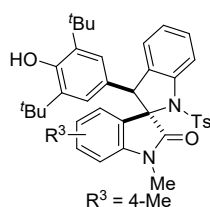

Yellow solid, isolated yield 98% (70 mg);

dr > 19:1;

mp: 207.5-208.4  $^{\circ}\text{C}$ ;

<sup>1</sup>H NMR (400 MHz, CDCl<sub>3</sub>): δ 7.73 (d, *J* = 8.1 Hz, 2H), 7.53 (d, *J* = 8.2 Hz, 1H), 7.30-7.22 (m, 4H), 7.13 (d, *J* = 7.4 Hz, 1H), 7.02 (t, *J* = 7.4 Hz, 1H), 6.90 (d, *J* = 7.8 Hz, 1H), 6.57 (s, 2H), 6.49 (d, *J* = 7.7 Hz, 1H), 5.14 (s, 1H), 4.92 (s, 1H), 2.59 (s, 3H), 2.40 (s, 3H), 2.16 (s, 3H), 1.26 (s, 18H);

<sup>13</sup>C NMR (101 MHz, CDCl<sub>3</sub>): δ 171.9, 153.5, 144.0, 143.7, 143.4, 136.6, 135.0, 134.8, 129.7, 129.34, 129.26, 128.4, 127.8, 126.7, 125.9, 125.2, 125.1, 124.2, 122.6, 112.8, 105.4, 77.9, 56.8, 34.1, 30.1, 25.4, 21.6, 17.9;

IR (neat): ν 3854, 2922, 1734, 1655, 1606, 1459, 1363, 1243, 1166, 1054, 750 cm<sup>-1</sup>;

HRMS (ESI): *m/z* [M - H]<sup>+</sup> calcd. for C<sub>38</sub>H<sub>41</sub>N<sub>2</sub>O<sub>4</sub>S: 621.2793; found: 621.2789.

**4'-chloro-3-(3,5-di-*tert*-butyl-4-hydroxyphenyl)-1'-methyl-1-tosyl-2,3'-spirobi[indolin]-2'-one (3ac)**

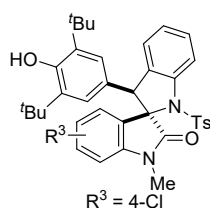

Foam, isolated yield 96% (62 mg);

dr > 19:1;

mp: 214.5-215.3 °C;

<sup>1</sup>H NMR (400 MHz, CDCl<sub>3</sub>): δ 7.74 (d, *J* = 8.2 Hz, 2H), 7.53 (d, *J* = 8.1 Hz, 1H), 7.34-7.28 (m, 2H), 7.26-7.24 (m, 2H), 7.13 (d, *J* = 7.4 Hz, 1H), 7.08-7.01 (m, 2H), 6.62-6.57 (m, 3H), 5.23 (s, 1H), 5.16 (s, 1H), 2.62 (s, 3H), 2.41 (s, 3H), 1.26 (s, 18H);

<sup>13</sup>C NMR (101 MHz, CDCl<sub>3</sub>): δ 171.7, 153.6, 145.8, 144.0, 143.4, 136.7, 135.2, 130.9, 130.7, 129.7, 129.3, 128.3, 127.7, 126.0, 125.5, 124.9, 123.8, 123.5, 122.7, 112.9, 106.3, 77.9, 55.6, 34.1, 30.1, 25.6, 21.6;

IR (neat): ν 3637, 2957, 1738, 1611, 1461, 1611, 1461, 1358, 1167, 931, 748 cm<sup>-1</sup>;

HRMS (ESI): *m/z* [M - H]<sup>+</sup> calcd. for C<sub>37</sub>H<sub>38</sub>ClN<sub>2</sub>O<sub>4</sub>S: 641.2246; found: 641.2245.

**4'-bromo-3-(3,5-di-*tert*-butyl-4-hydroxyphenyl)-1'-methyl-1-tosyl-2,3'-spirobi[indolin]-2'-one (3ad)**

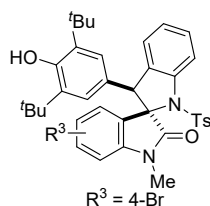

White solid, isolated yield >99% (70 mg);

dr > 19:1;

mp: 149.1-150.0 °C;

<sup>1</sup>H NMR (400 MHz, CDCl<sub>3</sub>): δ 7.74 (d, *J* = 8.2 Hz, 2H), 7.52 (d, *J* = 8.2 Hz, 1H), 7.30-7.22 (m, 5H), 7.13 (d, *J* = 7.4 Hz, 1H), 7.03 (t, *J* = 7.4 Hz, 1H), 6.63-6.61 (m, 3H), 5.29 (s, 1H), 5.16 (s, 1H), 2.62 (s, 3H), 2.41 (s, 3H), 1.26 (s, 18H);

<sup>13</sup>C NMR (101 MHz, CDCl<sub>3</sub>): δ 171.6, 153.6, 146.0, 144.0, 143.4, 136.7, 135.2, 130.8, 129.7, 129.4, 128.3, 127.9, 127.2, 126.6, 126.0, 124.9, 123.8, 122.7, 119.4, 112.9, 106.8, 78.5, 55.6, 34.1, 30.1, 25.5, 21.6;

IR (neat): ν 3632, 2958, 1730, 1606, 1460, 1359, 1239, 1167, 1115, 1091, 931, 749 cm<sup>-1</sup>;

HRMS (ESI): *m/z* [M - H]<sup>+</sup> calcd. for C<sub>37</sub>H<sub>38</sub>BrN<sub>2</sub>O<sub>4</sub>S: 685.1741; found: 685.1740.

### 3-(3,5-di-*tert*-butyl-4-hydroxyphenyl)-1',5'-dimethyl-1-tosyl-2,3'-spirobi[indolin]-2'-one (3ae)

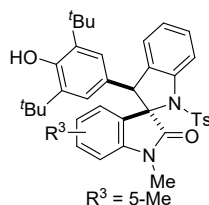

White solid, isolated yield 96% (60 mg);

dr > 19:1;

mp: 238.7-239.5 °C;

<sup>1</sup>H NMR (400 MHz, CDCl<sub>3</sub>): δ 7.94 (d, *J* = 8.2 Hz, 2H), 7.35 (d, *J* = 8.1 Hz, 1H), 7.26-7.22 (m, 3H), 7.16 (d, *J* = 7.3 Hz, 1H), 7.04 (t, *J* = 7.4 Hz, 1H), 6.82 (d, *J* = 7.8 Hz, 1H), 6.74 (s, 2H), 6.50 (s, 1H), 6.38 (d, *J* = 7.9 Hz, 1H), 5.14 (s, 1H), 4.99 (s, 1H), 3.19 (s, 3H), 2.39 (s, 3H), 2.05 (s, 3H), 1.24 (s, 18H);

<sup>13</sup>C NMR (101 MHz, CDCl<sub>3</sub>): δ 175.6, 153.1, 144.0, 142.4, 139.5, 136.4, 135.1, 131.0, 130.2, 129.7, 129.4, 128.29, 128.27, 126.3, 125.7, 125.4, 124.8, 123.6, 122.8, 112.4, 107.6, 78.3, 58.8, 34.0, 30.1, 26.6, 21.6, 20.9;

IR (neat): ν 3855, 3631, 2921, 1720, 1499, 1459, 1363, 1166, 1091, 932, 750 cm<sup>-1</sup>;

HRMS (ESI): *m/z* [M - H]<sup>+</sup> calcd. for C<sub>38</sub>H<sub>41</sub>N<sub>2</sub>O<sub>4</sub>S: 621.2793; found: 621.2791.

### 3-(3,5-di-*tert*-butyl-4-hydroxyphenyl)-5'-methoxy-1'-methyl-1-tosyl-2,3'-spirobi[indolin]-2'-one (3af)

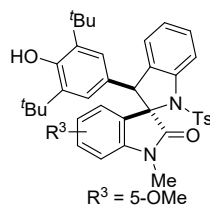

White solid, isolated yield >99% (68 mg);

dr > 19:1;

mp: 207.6-208.3 °C;

$^1\text{H}$  NMR (400 MHz,  $\text{CDCl}_3$ ):  $\delta$  7.97 (d,  $J = 8.1$  Hz, 2H), 7.33 (d,  $J = 8.1$  Hz, 1H), 7.26-7.21 (m, 3H), 7.15 (d,  $J = 7.3$  Hz, 1H), 7.02 (t,  $J = 7.4$  Hz, 1H), 6.75 (s, 2H), 6.53 (dd,  $J = 8.3, 2.0$  Hz, 1H), 6.39-6.34 (m, 2H), 5.14 (s, 1H), 5.01 (s, 1H), 3.54 (s, 3H), 3.18 (s, 3H), 2.38 (s, 3H), 1.25 (s, 18H);

$^{13}\text{C}$  NMR (101 MHz,  $\text{CDCl}_3$ ):  $\delta$  175.2, 155.0, 153.1, 144.1, 142.3, 136.5, 135.3, 135.1, 130.0, 129.4, 128.3, 128.2, 127.7, 125.7, 125.4, 123.5, 122.9, 112.6, 112.5, 112.0, 108.0, 78.5, 58.8, 55.1, 34.0, 30.1, 26.6, 21.6;

IR (neat):  $\nu$  3855, 3650, 2958, 1718, 1654, 1458, 1363, 1235, 1165, 1046, 750  $\text{cm}^{-1}$ ;

HRMS (ESI):  $m/z$   $[\text{M} - \text{H}]^+$  calcd. for  $\text{C}_{38}\text{H}_{41}\text{N}_2\text{O}_5\text{S}$ : 637.2742; found: 637.2740.

### 3-(3,5-di-*tert*-butyl-4-hydroxyphenyl)-1',5'-dimethyl-1-tosyl-2,3'-spirobi[indolin]-2'-one (3ag)

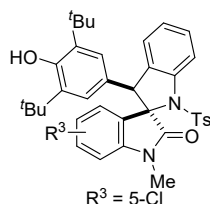

Red solid, isolated yield 98% (62 mg);

dr > 19:1;

mp: 216.7-217.4 °C;

$^1\text{H}$  NMR (400 MHz,  $\text{CDCl}_3$ ):  $\delta$  7.89 (d,  $J = 8.2$  Hz, 2H), 7.39 (d,  $J = 8.0$  Hz, 1H), 7.30-7.23 (m, 3H), 7.17 (d,  $J = 7.4$  Hz, 1H), 7.06 (t,  $J = 7.4$  Hz, 1H), 7.00 (d,  $J = 8.3$  Hz, 1H), 6.73 (s, 2H), 6.59 (s, 1H), 6.42 (d,  $J = 8.3$  Hz, 1H), 5.15 (s, 1H), 5.04 (s, 1H), 3.21 (s, 3H), 2.39 (s, 3H), 1.26 (s, 18H);

$^{13}\text{C}$  NMR (101 MHz,  $\text{CDCl}_3$ ):  $\delta$  175.3, 153.3, 144.4, 142.2, 140.5, 136.1, 135.4, 129.6, 129.5, 129.1, 128.6, 128.1, 127.8, 127.1, 125.6, 125.5, 124.6, 123.3, 123.2, 112.6, 108.8, 77.8, 58.9, 34.0, 30.1, 26.7, 21.6;

IR (neat):  $\nu$  3752, 2922, 1734, 1654, 1560, 1458, 1363, 1166, 1028, 804, 667  $\text{cm}^{-1}$ ;

HRMS (ESI):  $m/z$   $[\text{M} - \text{H}]^+$  calcd. for  $\text{C}_{37}\text{H}_{38}\text{ClN}_2\text{O}_4\text{S}$ : 641.2246; found: 641.2243.

**5'-bromo-3-(3,5-di-*tert*-butyl-4-hydroxyphenyl)-1'-methyl-1-tosyl-2,3'-spirobi[indolin]-2'-one (3ah)**

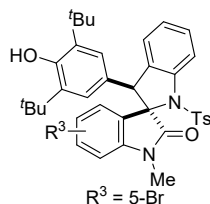

White solid, isolated yield >99% (72 mg);

dr > 19:1;

mp: 256.1-257.0 °C;

<sup>1</sup>H NMR (400 MHz, CDCl<sub>3</sub>): δ 7.84 (d, *J* = 8.1 Hz, 2H), 7.42 (d, *J* = 8.1 Hz, 1H), 7.30 (d, *J* = 7.7 Hz, 1H), 7.23 (d, *J* = 8.0 Hz, 2H), 7.16 (t, *J* = 8.1 Hz, 2H), 7.06 (t, *J* = 7.4 Hz, 1H), 6.73 (s, 2H), 6.67 (s, 1H), 6.38 (d, *J* = 8.3 Hz, 1H), 5.15 (s, 1H), 5.04 (s, 1H), 3.21 (s, 3H), 2.40 (s, 3H), 1.27 (s, 18H);

<sup>13</sup>C NMR (101 MHz, CDCl<sub>3</sub>): δ 175.3, 153.3, 144.4, 142.2, 141.0, 136.1, 135.4, 132.0, 129.6, 129.5, 128.6, 128.02, 128.00, 127.3, 125.51, 125.47, 123.3, 123.2, 114.5, 112.7, 109.3, 77.6, 58.9, 34.0, 30.1, 26.7, 21.6;

IR (neat): ν 3854, 3630, 2961, 1734, 1654, 1559, 1458, 1362, 1167, 1121, 807, 738 cm<sup>-1</sup>;

HRMS (ESI): *m/z* [M - H]<sup>+</sup> calcd. for C<sub>37</sub>H<sub>38</sub>BrN<sub>2</sub>O<sub>4</sub>S: 685.1741; found: 685.1738.

**3-(3,5-di-*tert*-butyl-4-hydroxyphenyl)-1',6'-dimethyl-1-tosyl-2,3'-spirobi[indolin]-2'-one (3ai)**

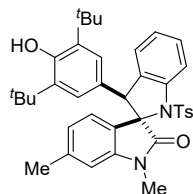

Yellow solid, isolated yield 74% (46 mg);

dr > 19:1;

mp: 234.2-235.0 °C;

<sup>1</sup>H NMR (400 MHz, CDCl<sub>3</sub>): δ 8.05 (d, *J* = 8.1 Hz, 2H), 7.29-7.26 (m, 2H), 7.24-7.19 (m, 2H), 7.13 (d, *J* = 7.3 Hz, 1H), 7.01 (t, *J* = 7.1 Hz, 1H), 6.74-6.73 (m, 3H), 6.55 (d, *J* = 7.6 Hz, 1H), 6.30 (s, 1H), 5.10 (s, 1H), 5.00 (s, 1H), 3.17 (s, 3H), 2.40 (s, 3H), 2.19 (s, 3H), 1.25 (s, 18H);

<sup>13</sup>C NMR (101 MHz, CDCl<sub>3</sub>): δ 175.9, 153.1, 144.1, 142.3, 141.7, 139.5, 136.5, 135.0, 130.4, 129.5, 128.4, 128.2, 125.9, 125.3, 124.0, 123.6, 123.5, 122.8, 122.5, 112.3, 108.7, 78.6, 59.0, 34.0, 30.1, 26.4, 21.7, 21.6;

IR (neat): ν 3855, 3752, 2920, 1721, 1618, 1459, 1166, 1029, 750 cm<sup>-1</sup>;



HRMS (ESI):  $m/z$   $[M - H]^+$  calcd. for  $C_{38}H_{41}N_2O_4S$ : 621.2793; found: 621.2788.

**3-(3,5-di-*tert*-butyl-4-hydroxyphenyl)-6'-fluoro-1'-methyl-1-tosyl-2,3'-spirobi[indolin]-2'-one (3aj)**

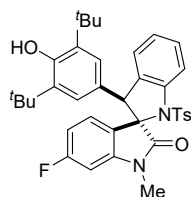

White solid, isolated yield 93% (58 mg);

dr > 19:1;

mp: 231.7-232.7 °C;

$^1H$  NMR (400 MHz,  $CDCl_3$ ):  $\delta$  8.02 (d,  $J = 8.0$  Hz, 2H), 7.29 (d,  $J = 8.0$  Hz, 2H), 7.26-7.20 (m, 2H), 7.15 (d,  $J = 7.2$  Hz, 1H), 7.03 (t,  $J = 7.2$  Hz, 1H), 6.80 (dd,  $J = 7.9, 5.6$  Hz, 1H), 6.73 (s, 2H), 6.41 (d,  $J = 9.0$  Hz, 1H), 6.24 (d,  $J = 8.8$  Hz, 1H), 5.12 (s, 1H), 5.05 (s, 1H), 3.18 (s, 3H), 2.40 (s, 3H), 1.27 (s, 18H);

$^{13}C$  NMR (101 MHz,  $CDCl_3$ ):  $\delta$  176.1, 164.9 (d,  $J_{C-F} = 245.3$  Hz), 153.2, 144.3, 143.5 (d,  $J_{C-F} = 11.7$  Hz), 142.1, 136.2, 135.3, 129.9, 129.6, 128.4, 128.3, 125.7, 125.4, 125.1 (d,  $J_{C-F} = 9.8$  Hz), 123.2, 123.0, 122.4 (d,  $J_{C-F} = 2.7$  Hz), 112.4, 108.0 (d,  $J_{C-F} = 22.3$  Hz), 96.8 (d,  $J_{C-F} = 27.6$  Hz), 78.0, 59.0, 34.0, 30.1, 26.6, 21.6;

IR (neat):  $\nu$  3855, 3753, 2919, 1735, 1719, 1655, 1560, 1459, 1166, 1031, 750  $cm^{-1}$ ;

HRMS (ESI):  $m/z$   $[M - H]^+$  calcd. for  $C_{37}H_{38}FN_2O_4S$ : 625.2542; found: 625.2540.

**6'-chloro-3-(3,5-di-*tert*-butyl-4-hydroxyphenyl)-1'-methyl-1-tosyl-2,3'-spirobi[indolin]-2'-one (3ak)**

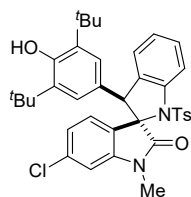

White solid, isolated yield 96% (62 mg);

dr > 19:1;

mp: 211.5-212.4 °C;

$^1H$  NMR (400 MHz,  $CDCl_3$ ):  $\delta$  8.04 (d,  $J = 8.2$  Hz, 2H), 7.30 (d,  $J = 8.1$  Hz, 2H), 7.24-7.20 (m, 2H), 7.14 (d,  $J = 7.4$  Hz, 1H), 7.03 (t,  $J = 7.5$  Hz, 1H), 6.88 (d,  $J = 7.9$  Hz, 1H), 6.74-6.71 (m, 3H), 6.63 (s, 1H), 5.11 (s, 1H), 5.06 (s, 1H), 3.16 (s, 3H), 2.41 (s, 3H), 1.27 (s, 18H);

$^{13}\text{C}$  NMR (101 MHz,  $\text{CDCl}_3$ ):  $\delta$  175.5, 153.3, 144.4, 143.0, 142.1, 136.2, 135.3, 129.9, 129.6, 128.4, 128.3, 126.0, 125.7, 125.3, 125.0, 124.7, 123.0, 122.95, 122.90, 112.4, 111.4, 78.2, 59.1, 34.1, 30.1, 26.6, 21.6;

IR (neat):  $\nu$  3637, 2957, 1727, 1607, 1440, 1347, 1240, 1166, 1091, 749, 669  $\text{cm}^{-1}$ ;

HRMS (ESI):  $m/z$   $[\text{M} - \text{H}]^+$  calcd. for  $\text{C}_{37}\text{H}_{38}\text{ClN}_2\text{O}_4\text{S}$ : 641.2246; found: 641.2245.

**6'-bromo-3-(3,5-di-*tert*-butyl-4-hydroxyphenyl)-1'-methyl-1-tosyl-2,3'-spirobi[indolin]-2'-one (3al)**

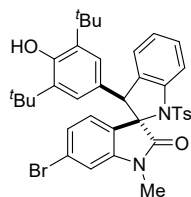

Red solid, isolated yield 96% (62 mg);

dr > 19:1;

mp: 220.1-221.0  $^{\circ}\text{C}$ ;

$^1\text{H}$  NMR (400 MHz,  $\text{CDCl}_3$ ):  $\delta$  8.04 (d,  $J = 8.1$  Hz, 2H), 7.30 (d,  $J = 8.0$  Hz, 2H), 7.26-7.21 (m, 2H), 7.14 (d,  $J = 7.4$  Hz, 1H), 7.03 (t,  $J = 7.2$  Hz, 1H), 6.79 (d,  $J = 7.9$  Hz, 1H), 6.73-6.72 (m, 3H), 6.49 (s, 1H), 5.11 (s, 1H), 5.06 (s, 1H), 3.17 (s, 3H), 2.41 (s, 3H), 1.27 (s, 18H);

$^{13}\text{C}$  NMR (101 MHz,  $\text{CDCl}_3$ ):  $\delta$  175.7, 153.3, 144.4, 142.9, 142.1, 136.2, 135.3, 135.0, 129.9, 129.6, 128.4, 128.3, 125.7, 125.5, 125.3, 124.7, 123.04, 122.99, 121.7, 112.4, 108.6, 78.1, 59.1, 34.1, 30.1, 26.6, 21.6;

IR (neat):  $\nu$  3854, 3650, 2927, 1734, 1636, 1559, 1541, 1458, 1437, 1166, 669  $\text{cm}^{-1}$ ;

HRMS (ESI):  $m/z$   $[\text{M} - \text{H}]^+$  calcd. for  $\text{C}_{37}\text{H}_{38}\text{BrN}_2\text{O}_4\text{S}$ : 685.1741; found: 685.1738.

**3-(3,5-di-*tert*-butyl-4-hydroxyphenyl)-1',7'-dimethyl-1-tosyl-2,3'-spirobi[indolin]-2'-one (3am)**

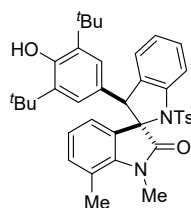

White solid, isolated yield >99% (68 mg);

dr > 19:1;

mp: 230.2-231.1  $^{\circ}\text{C}$ ;

<sup>1</sup>H NMR (400 MHz, CDCl<sub>3</sub>): δ 8.07 (d, *J* = 8.1 Hz, 2H), 7.29 (d, *J* = 8.2 Hz, 2H), 7.24-7.19 (m, 2H), 7.14 (d, *J* = 7.3 Hz, 1H), 7.01 (t, *J* = 7.2 Hz, 1H), 6.76-6.70 (m, 4H), 6.61 (t, *J* = 7.5 Hz, 1H), 5.12 (s, 1H), 5.02 (s, 1H), 3.50 (s, 3H), 2.40 (s, 3H), 2.29 (s, 3H), 1.27 (s, 18H);

<sup>13</sup>C NMR (101 MHz, CDCl<sub>3</sub>): δ 176.6, 153.1, 144.1, 142.4, 139.2, 136.4, 135.0, 132.9, 130.1, 129.5, 128.4, 128.2, 127.6, 125.7, 125.4, 123.4, 122.8, 121.9, 121.7, 119.4, 112.2, 78.2, 59.4, 34.0, 30.1, 30.0, 21.6, 18.7;

IR (neat): ν 3855, 3631, 2920, 1720, 1655, 1459, 1438, 1364, 1166, 750 cm<sup>-1</sup>;

HRMS (ESI): *m/z* [M - H]<sup>+</sup> calcd. for C<sub>38</sub>H<sub>41</sub>N<sub>2</sub>O<sub>4</sub>S: 621.2793; found: 621.2790.

**3-(3,5-di-*tert*-butyl-4-hydroxyphenyl)-7'-methoxy-1'-methyl-1-tosyl-2,3'-spirobi[indolin]-2'-one (3an)**

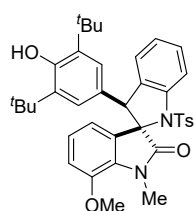

Yellow solid, isolated yield 75% (48 mg);

dr > 19:1;

mp: 259.3-260.1 °C;

<sup>1</sup>H NMR (400 MHz, CDCl<sub>3</sub>): δ 8.09 (d, *J* = 8.1 Hz, 2H), 7.28 (d, *J* = 8.0 Hz, 2H), 7.24-7.18 (m, 2H), 7.14 (d, *J* = 7.3 Hz, 1H), 7.01 (t, *J* = 6.9 Hz, 1H), 6.74 (s, 2H), 6.66 (t, *J* = 8.1 Hz, 1H), 6.59 (d, *J* = 8.2 Hz, 1H), 6.50 (d, *J* = 7.3 Hz, 1H), 5.11 (s, 1H), 5.02 (s, 1H), 3.64 (s, 3H), 3.49 (s, 3H), 2.40 (s, 3H), 1.27 (s, 18H);

<sup>13</sup>C NMR (101 MHz, CDCl<sub>3</sub>): δ 176.0, 153.1, 145.2, 144.1, 142.4, 136.5, 135.0, 130.2, 129.52, 129.51, 128.8, 128.5, 128.2, 125.7, 125.4, 123.5, 122.8, 122.6, 116.7, 113.4, 112.3, 78.6, 59.3, 56.1, 34.1, 30.1, 29.9, 21.6;

IR (neat): ν 3854, 3745, 3650, 2918, 1654, 1559, 1541, 1458, 1437, 1375, 1046 cm<sup>-1</sup>;

HRMS (ESI): *m/z* [M - H]<sup>+</sup> calcd. for C<sub>38</sub>H<sub>41</sub>N<sub>2</sub>O<sub>5</sub>S: 637.2742; found: 637.2739.

**3-(3,5-di-*tert*-butyl-4-hydroxyphenyl)-1'-methyl-7'-nitro-1-tosyl-2,3'-spirobi[indolin]-2'-one (3ao)**

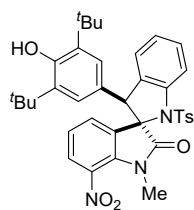

White solid, isolated yield 74% (48 mg);

dr > 19:1;

mp: 231.6-232.6 °C;

<sup>1</sup>H NMR (400 MHz, CDCl<sub>3</sub>): δ 8.09 (d, *J* = 8.1 Hz, 2H), 7.47 (d, *J* = 8.3 Hz, 1H), 7.34 (d, *J* = 8.0 Hz, 2H), 7.25-7.14 (m, 4H), 7.06 (t, *J* = 7.1 Hz, 1H), 6.84 (t, *J* = 8.0 Hz, 1H), 6.72 (s, 2H), 5.19 (s, 1H), 5.08 (s, 1H), 3.28 (s, 3H), 2.43 (s, 3H), 1.26 (s, 18H);

<sup>13</sup>C NMR (101 MHz, CDCl<sub>3</sub>): δ 177.3, 153.5, 144.7, 142.1, 135.9, 135.7, 135.4, 135.0, 131.8, 129.8, 129.3, 128.7, 128.4, 127.4, 125.6, 125.5, 124.9, 123.3, 122.6, 121.6, 112.3, 76.8, 59.6, 34.1, 30.5, 30.0, 21.7;

IR (neat): ν 3854, 3650, 2922, 1734, 1654, 1559, 1540, 1458, 1166, 1118, 742 cm<sup>-1</sup>;

HRMS (ESI): *m/z* [M - H]<sup>+</sup> calcd. for C<sub>37</sub>H<sub>38</sub>N<sub>3</sub>O<sub>6</sub>S: 652.2487; found: 652.2485.

### 3-(3,5-di-*tert*-butyl-4-hydroxyphenyl)-1'-ethyl-1-tosyl-2,3'-spirobi[indolin]-2'-one (3ap)

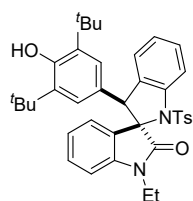

Yellow solid, isolated yield 74% (46 mg);

dr > 19:1;

mp: 188.1-189.0 °C;

<sup>1</sup>H NMR (400 MHz, CDCl<sub>3</sub>): δ 8.02 (d, *J* = 8.1 Hz, 2H), 7.28-7.26 (m, 2H), 7.23-7.19 (m, 1H), 7.11-6.99 (m, 4H), 6.88 (d, *J* = 7.3 Hz, 1H), 6.75-6.70 (m, 3H), 6.52 (d, *J* = 7.8 Hz, 1H), 5.14 (s, 1H), 5.00 (s, 1H), 3.91-3.82 (m, 1H), 3.67-3.58 (m, 1H), 2.39 (s, 3H), 1.24 (s, 18H);

<sup>13</sup>C NMR (101 MHz, CDCl<sub>3</sub>): δ 175.3, 153.1, 144.1, 142.2, 141.0, 136.5, 135.0, 130.7, 129.5, 129.2, 128.3, 128.2, 127.1, 126.1, 125.3, 124.2, 123.4, 122.8, 121.7, 112.3, 108.0, 78.4, 58.9, 35.0, 34.0, 30.0, 21.6, 12.5;

IR (neat): ν 3855, 3752, 2923, 1735, 1719, 1654, 1560, 1459, 1167, 1020, 750, 669 cm<sup>-1</sup>;

HRMS (ESI): *m/z* [M - H]<sup>+</sup> calcd. for C<sub>38</sub>H<sub>41</sub>N<sub>2</sub>O<sub>4</sub>S: 621.2793; found: 621.2791.

### 1'-allyl-3-(3,5-di-*tert*-butyl-4-hydroxyphenyl)-1-tosyl-2,3'-spirobi[indolin]-2'-one (3aq)

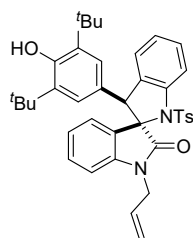

White solid, isolated yield 88% (56 mg);

dr > 19:1;

mp: 203.9-204.6 °C;

<sup>1</sup>H NMR (400 MHz, CDCl<sub>3</sub>): δ 8.02 (d, *J* = 8.2 Hz, 2H), 7.30-7.26 (m, 3H), 7.24-7.20 (m, 1H), 7.09 (d, *J* = 7.1 Hz, 1H), 7.05-6.99 (m, 2H), 6.91 (d, *J* = 7.3 Hz, 1H), 6.76-6.73 (m, 3H), 6.49 (d, *J* = 7.8 Hz, 1H), 5.80-5.71 (m, 1H), 5.18-5.14 (m, 3H), 5.01 (s, 1H), 4.46 (d, *J* = 16.6 Hz, 1H), 4.19 (dd, *J* = 16.5, 5.2 Hz, 1H), 2.39 (s, 3H), 1.25 (s, 18H);

<sup>13</sup>C NMR (101 MHz, CDCl<sub>3</sub>): δ 175.5, 153.2, 144.1, 142.2, 141.1, 136.4, 135.0, 130.8, 129.5, 129.2, 128.34, 128.25, 127.2, 126.8, 126.2, 125.2, 124.0, 123.3, 122.9, 121.9, 117.6, 112.3, 109.1, 78.6, 59.2, 42.7, 34.0, 30.1, 21.6;

IR (neat): ν 3854, 3745, 3650, 2922, 1734, 1654, 1559, 1507, 1166, 750 cm<sup>-1</sup>;

HRMS (ESI): *m/z* [M - H]<sup>+</sup> calcd. for C<sub>39</sub>H<sub>41</sub>N<sub>2</sub>O<sub>4</sub>S: 633.2793; found: 633.2791.

**3-(3,5-di-*tert*-butyl-4-hydroxyphenyl)-1'-(naphthalen-1-ylmethyl)-1-tosyl-2,3'-spirobi[indolin]-2'-one (3ar)**

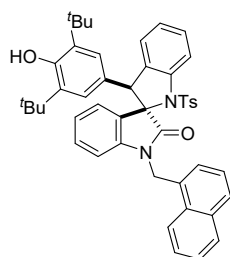

White solid, isolated yield 87% (64 mg);

dr = 4:1;

mp: 212.7-213.6 °C;

<sup>1</sup>H NMR (400 MHz, CDCl<sub>3</sub>): δ 8.09 (d, *J* = 8.0 Hz, 2H), 8.03 (d, *J* = 8.3 Hz, 1H), 7.88 (d, *J* = 8.0 Hz, 1H), 7.72 (d, *J* = 8.0 Hz, 1H), 7.59 (t, *J* = 7.1 Hz, 1H), 7.53 (t, *J* = 7.8 Hz, 1H), 7.35-7.27 (m, 6H), 7.12 (d, *J* = 7.8 Hz, 2H), 7.05 (d, *J* = 7.3 Hz, 1H), 6.97 (d, *J* = 7.3 Hz, 1H), 6.90 (t, *J* = 7.7 Hz, 1H), 6.81-6.75 (m, 3H), 6.20 (d, *J* = 7.8 Hz, 1H), 5.62 (d, *J* = 16.8 Hz, 1H), 5.22 (s, 1H), 5.10 (s, 1H), 2.40 (s, 3H), 1.28 (s, 18H);

<sup>13</sup>C NMR (101 MHz, CDCl<sub>3</sub>): δ 176.0, 153.4, 144.2, 142.2, 141.3, 136.5, 135.3, 133.7, 130.9, 130.6, 129.6, 129.5, 129.3, 129.0, 128.4, 128.3, 127.7, 127.0, 126.3, 125.9, 125.8, 125.7, 125.2, 123.9, 123.7, 123.4, 122.9, 122.3, 122.2, 112.4, 109.6, 79.1, 59.7, 42.1, 34.1, 30.2, 21.6;

IR (neat): ν 3855, 2920, 1734, 1654, 1560, 1457, 1360, 1027, 799, 665 cm<sup>-1</sup>;

HRMS (ESI): *m/z* [M - H]<sup>+</sup> calcd. for C<sub>47</sub>H<sub>45</sub>N<sub>2</sub>O<sub>4</sub>S: 733.3106; found: 733.3104.

**1'-benzyl-3-(3,5-di-*tert*-butyl-4-hydroxyphenyl)-1-tosyl-2,3'-spirobi[indolin]-2'-one (3as)**

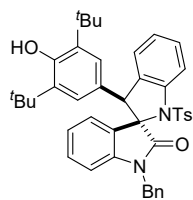

Yellow solid, isolated yield 64% (44 mg);

dr > 19:1;

mp: 232.2-233.0 °C;

$^1\text{H NMR}$  (400 MHz,  $\text{CDCl}_3$ ):  $\delta$  8.04 (d,  $J = 8.0$  Hz, 2H), 7.33-7.20 (m, 9H), 7.10 (d,  $J = 7.4$  Hz, 1H), 7.02 (t,  $J = 7.3$  Hz, 1H), 6.92-6.88 (m, 2H), 6.76 (s, 2H), 6.71 (t,  $J = 7.5$  Hz, 1H), 6.23 (d,  $J = 8.0$  Hz, 1H), 5.32 (d,  $J = 16.0$  Hz, 1H), 5.18 (s, 1H), 5.05 (s, 1H), 4.47 (d,  $J = 16.0$  Hz, 1H), 2.40 (s, 3H), 1.25 (s, 18H);

$^{13}\text{C NMR}$  (101 MHz,  $\text{CDCl}_3$ ):  $\delta$  175.8, 153.3, 144.1, 142.2, 141.0, 136.5, 135.1, 135.0, 130.8, 129.5, 129.2, 128.7, 128.4, 128.3, 127.3, 126.9, 126.8, 126.2, 125.2, 123.9, 123.3, 122.9, 122.1, 112.4, 109.5, 78.8, 59.5, 44.3, 34.1, 30.2, 21.6;

IR (neat):  $\nu$  3855, 3650, 2924, 1734, 1718, 1654, 1559, 1458, 1363, 1090, 750  $\text{cm}^{-1}$ ;

HRMS (ESI):  $m/z$   $[\text{M} - \text{H}]^+$  calcd. for  $\text{C}_{43}\text{H}_{43}\text{N}_2\text{O}_4\text{S}$ : 683.2949; found: 683.2947.

### 3-(3,5-di-tert-butyl-4-hydroxyphenyl)-1'-phenyl-1-tosyl-2,3'-spirobi[indolin]-2'-one (3at)

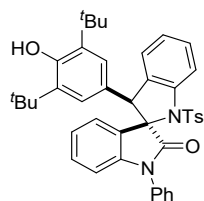

White solid, isolated yield 81% (54 mg);

dr > 19:1;

mp: 121.9-122.7 °C;

$^1\text{H NMR}$  (400 MHz,  $\text{CDCl}_3$ ):  $\delta$  8.06 (d,  $J = 8.1$  Hz, 2H), 7.50 (t,  $J = 7.4$  Hz, 2H), 7.42-7.39 (m, 1H), 7.34 (d,  $J = 7.6$  Hz, 2H), 7.28-7.22 (m, 4H), 7.13 (d,  $J = 7.6$  Hz, 1H), 7.05-6.98 (m, 3H), 6.85 (s, 2H), 6.80 (t,  $J = 7.4$  Hz, 1H), 6.47 (d,  $J = 8.0$  Hz, 1H), 5.23 (s, 1H), 5.07 (s, 1H), 2.39 (s, 3H), 1.27 (s, 18H);

$^{13}\text{C NMR}$  (101 MHz,  $\text{CDCl}_3$ ):  $\delta$  175.2, 153.3, 144.2, 142.1, 142.0, 136.4, 135.2, 134.4, 130.9, 129.6, 129.54, 129.49, 129.2, 128.4, 128.3, 128.1, 126.6, 126.4, 125.3, 124.3, 123.3, 122.9, 122.4, 112.3, 109.3, 78.7, 59.4, 34.1, 30.1, 21.6;

IR (neat):  $\nu$  3855, 3631, 2920, 1736, 1597, 1459, 1364, 1236, 1028, 750  $\text{cm}^{-1}$ ;

HRMS (ESI):  $m/z$   $[\text{M} - \text{H}]^+$  calcd. for  $\text{C}_{42}\text{H}_{41}\text{N}_2\text{O}_4\text{S}$ : 669.2793; found: 669.2792.

### Procedure for one-pot reaction

To a solution of compound **4** (70 mg, 0.15 mmol) in CHCl<sub>3</sub> (1.5 mL) was added MnO<sub>2</sub> (65 mg, 0.75 mmol), then the reaction mixture was stirred at 60 °C for 4 h. The reaction mixture was directly cooled to -20 °C and was added **2a** (18 mg, 0.1 mmol) and TMG (29 mg, 0.25 mmol). The reaction was stirred at -20 °C for 30 min. The reaction mixture was directly charged to column chromatography on silica gel (PE:DCM:EA = 30:1:1-10:1:1) to give the cycloadduct (47 mg, 77% yield).

### Procedure for synthesis of **5**

To a solution of compound **3aa** (200 mg, 0.33 mmol) in dry toluene (16 mL) was added AlCl<sub>3</sub> (432 mg, 3.3 mmol) in one portion. The reaction mixture was stirred at 0 °C for 2 h and H<sub>2</sub>O was added to quench the reaction and extracted with DCM (3 × 20 mL). The organic layer was dried with anhydrous Na<sub>2</sub>SO<sub>4</sub> and solvent was concentrated under reduced pressure to give a residue, which was purified by column chromatography (PE:EA = 10:1-4:1) to afford the product **5** (166 mg, 91% yield).

### Procedure for synthesis of **6**

To a solution of compound **3aa** (30 mg, 0.05 mmol) in dry toluene (0.3 mL) was added a solution of AlCl<sub>3</sub> (80 mg, 0.6 mmol) in MeNO<sub>2</sub> (0.3 mL) in one portion. The reaction mixture was stirred at 60 °C for 1 h and H<sub>2</sub>O was added to quench the reaction and extracted with DCM (3 × 5 mL). The organic layer was dried with anhydrous Na<sub>2</sub>SO<sub>4</sub> and solvent was concentrated under reduced pressure to give a residue, which was purified by column chromatography (PE:EA = 4:1) to afford the product **6** (20 mg, 79% yield).

### 3-(3-(tert-butyl)-4-hydroxyphenyl)-1'-methyl-1-tosyl-2,3'-spiro[indolin]-2'-one (**5**)

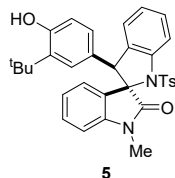

White solid, isolated yield 91% (166 mg);

dr > 19:1;

mp: 207.9-208.5 °C;

<sup>1</sup>H NMR (400 MHz, DMSO-D<sub>6</sub>): δ 9.23 (s, 1H), 7.84 (d, *J* = 8.3 Hz, 2H), 7.37 (d, *J* = 8.2 Hz, 2H), 7.31-7.24 (m, 2H), 7.12-7.06 (m, 3H), 6.79 (d, *J* = 7.8 Hz, 1H), 6.69 (t, *J* = 7.5 Hz, 1H), 6.63 (s, 1H), 6.56-6.53 (m, 2H), 6.46 (d, *J* = 8.2 Hz, 1H), 4.96 (s, 1H), 3.14 (s, 3H), 2.37 (s, 3H), 1.12 (s, 9H);

<sup>13</sup>C NMR (101 MHz, DMSO-D<sub>6</sub>): δ 175.4, 155.7, 145.0, 142.5, 142.1, 136.2, 135.0, 130.6, 130.21, 130.20, 130.0, 129.0, 128.4, 127.7, 126.3, 125.8, 124.1, 123.6, 122.9, 122.1, 116.0, 112.5, 109.1, 78.1, 58.3, 34.5, 29.5, 27.0, 21.6;

IR (neat): ν 3855, 3650, 2922, 1718, 1654, 1560, 1457, 1360, 1090, 750 cm<sup>-1</sup>;

HRMS (ESI): *m/z* [M - H]<sup>+</sup> calcd. for C<sub>33</sub>H<sub>31</sub>N<sub>2</sub>O<sub>4</sub>S: 551.2010; found: 551.2009.

### 3-(4-hydroxyphenyl)-1'-methyl-1-tosyl-2,3'-spiro[indolin]-2'-one (**6**)

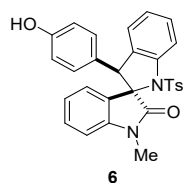

White solid, isolated yield 79% (20 mg);

dr > 19:1;

mp: 223.7-224.4 °C;

<sup>1</sup>H NMR (400 MHz, CDCl<sub>3</sub>): δ 7.96 (d, *J* = 8.1 Hz, 2H), 7.26-7.20 (m, 4H), 7.10-6.98 (m, 3H), 6.88-6.84 (m, 3H), 6.72 (t, *J* = 7.5 Hz, 1H), 6.57-6.52 (m, 3H), 5.15 (s, 1H), 5.09 (s, 1H), 3.21 (s, 3H), 2.39 (s, 3H);

<sup>13</sup>C NMR (101 MHz, CDCl<sub>3</sub>): δ 175.9, 155.2, 144.2, 142.1, 142.0, 136.3, 130.7, 130.3, 129.6, 129.5, 128.4, 128.3, 126.3, 125.3, 125.2, 124.1, 122.9, 122.1, 114.8, 112.4, 108.3, 78.2, 57.9, 26.7, 21.6;

IR (neat): ν 3854, 2920, 1733, 1717, 1652, 1559, 1459, 1091, 750 cm<sup>-1</sup>;

HRMS (ESI): *m/z* [M - H]<sup>+</sup> calcd. for C<sub>29</sub>H<sub>23</sub>N<sub>2</sub>O<sub>4</sub>S: 495.1384; found: 495.1383.

### Procedure for synthesis of 8

To a solution of the compound **3ja** (34 mg, 0.05 mmol), 4-methoxyphenylboronic acid **7** (9 mg, 0.06 mmol), K<sub>2</sub>CO<sub>3</sub> (21 mg, 0.15 mmol) in DMF/H<sub>2</sub>O (4:1, 1.5 mL) was added Pd(PPh<sub>3</sub>)<sub>4</sub> (6 mg, 0.005 mmol) and N<sub>2</sub> was bubbled through the mixture for 2 min. The mixture was stirred at 80 °C for 4h, then cooled to room temperature. The reaction mixture was diluted with water (5 mL), and then extracted with EA (3 x 15 mL). The combined organic layer was washed with water, dried over anhydrous Na<sub>2</sub>SO<sub>4</sub> and concentrated under reduced pressure to give a residue, which was purified by column chromatography (PE:EA = 4:1) to afford the product **8** (31 mg, 87% yield).

### 3-(3,5-di-tert-butyl-4-hydroxyphenyl)-6-(4-methoxyphenyl)-1'-methyl-1-tosyl-2,3'-spirobi[indolin]-2'-one (**8**)

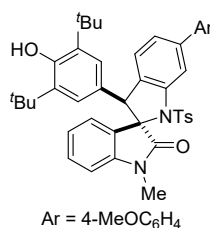

White solid, isolated yield 87% (31 mg);

dr > 19:1;

mp: 214.9-215.7 °C;



<sup>1</sup>H NMR (400 MHz, CDCl<sub>3</sub>): δ 8.05 (d, *J* = 8.1 Hz, 2H), 7.52-7.48 (m, 3H), 7.29-7.26 (m, 2H), 7.19 (d, *J* = 9.4 Hz, 2H), 7.07-6.98 (m, 3H), 6.91 (d, *J* = 7.2 Hz, 1H), 6.74-6.72 (m, 3H), 6.49 (d, *J* = 7.8 Hz, 1H), 5.17 (s, 1H), 5.00 (s, 1H), 3.87 (s, 3H), 3.21 (s, 3H), 2.39 (s, 3H), 1.26 (s, 18H);

<sup>13</sup>C NMR (101 MHz, CDCl<sub>3</sub>): δ 175.6, 159.2, 153.1, 144.2, 142.9, 141.7, 141.3, 136.5, 135.1, 133.3, 129.6, 129.3, 128.7, 128.4, 128.2, 126.9, 125.7, 125.4, 124.0, 123.5, 122.0, 121.5, 114.2, 110.8, 107.9, 78.8, 58.8, 55.3, 34.1, 30.1, 26.5, 21.6;

IR (neat): ν 3855, 2923, 1730, 1718, 1650, 1559, 1458, 1090, 750 cm<sup>-1</sup>;

HRMS (ESI): *m/z* [M - H]<sup>+</sup> calcd. for C<sub>44</sub>H<sub>45</sub>N<sub>2</sub>O<sub>5</sub>S: 713.3055; found: 713.3052.

### Procedure for synthesis of 9

To a solution of the compound **3al** (28 mg, 0.04 mmol), 4-methoxyphenylboronic acid **7** (7.3 mg, 0.048 mmol), K<sub>2</sub>CO<sub>3</sub> (16.5 mg, 0.12 mmol) in DMF/H<sub>2</sub>O (4:1, 1.5 mL) was added Pd(PPh<sub>3</sub>)<sub>4</sub> (4.7 mg, 0.004 mmol) and N<sub>2</sub> was bubbled through the mixture for 2 min. The mixture was stirred at 80 °C for 4h, then cooled to room temperature. The reaction mixture was diluted with water (5 mL), and then extracted with EA (3 x 15 mL). The combined organic layer was washed with water, dried over anhydrous Na<sub>2</sub>SO<sub>4</sub> and concentrated under reduced pressure to give a residue, which was purified by column chromatography (PE:EA = 4:1) to afford the product **9** (24 mg, 85% yield).

### 3-(3,5-di-tert-butyl-4-hydroxyphenyl)-6'-(4-methoxyphenyl)-1'-methyl-1-tosyl-2,3'-spirobi[indolin]-2'-one (**9**)

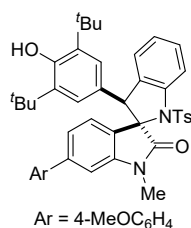

White solid, isolated yield 85% (24.3 mg);

dr > 19:1;

mp: 221.5-222.4 °C;

<sup>1</sup>H NMR (400 MHz, CDCl<sub>3</sub>): δ 8.06 (d, *J* = 8.2 Hz, 2H), 7.33-7.26 (m, 5H), 7.23 (d, *J* = 8.2 Hz, 1H), 7.16 (d, *J* = 7.5 Hz, 1H), 7.04 (t, *J* = 7.3 Hz, 1H), 6.91 (d, *J* = 8.6 Hz, 2H), 6.88 (s, 2H), 6.78 (s, 2H), 6.61 (s, 1H), 5.16 (s, 1H), 4.98 (s, 1H), 3.83 (s, 3H), 3.24 (s, 3H), 2.40 (s, 3H), 1.24 (s, 18H);

<sup>13</sup>C NMR (101 MHz, CDCl<sub>3</sub>): δ 175.9, 159.2, 153.2, 144.2, 142.6, 142.32, 142.26, 136.5, 135.2, 133.6, 130.3, 129.6, 128.4, 128.3, 128.1, 125.8, 125.3, 125.2, 124.0, 123.4, 122.9, 120.6, 114.1, 112.4, 106.5, 78.6, 59.1, 55.3, 34.1, 30.1, 26.6, 21.6;

IR (neat): ν 3856, 2922, 1740, 1598, 1559, 1458, 1366, 1089, 750 cm<sup>-1</sup>;

HRMS (ESI): *m/z* [M - H]<sup>+</sup> calcd. for C<sub>44</sub>H<sub>45</sub>N<sub>2</sub>O<sub>5</sub>S: 713.3055; found: 713.3052.

### Condition screening for asymmetric version

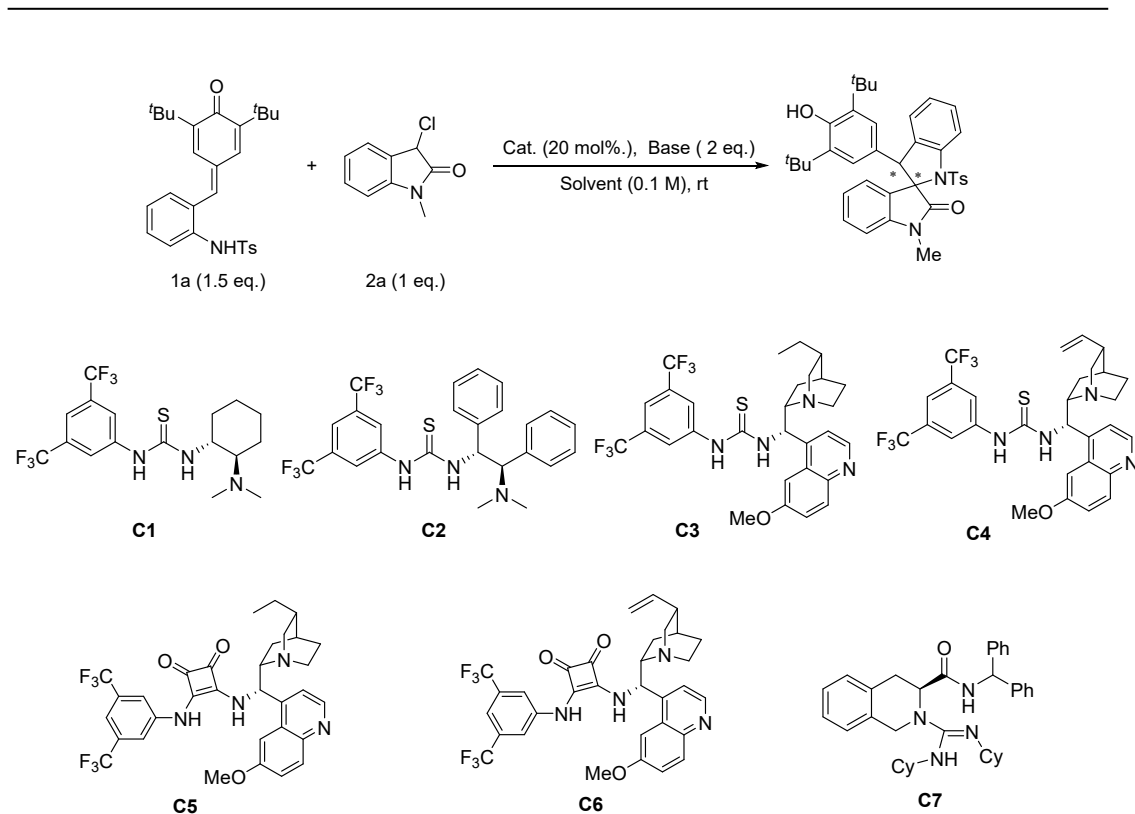

| Entry | Cat. | Base                             | Solvent           | dr <sup>a</sup> | yield <sup>b</sup> | ee <sup>c</sup> |
|-------|------|----------------------------------|-------------------|-----------------|--------------------|-----------------|
| 1     | C1   | CH <sub>3</sub> COOLi            | CHCl <sub>3</sub> | -               | Trace              | -               |
| 2     | C2   | CH <sub>3</sub> COOLi            | CHCl <sub>3</sub> | -               | n.d.               | -               |
| 3     | C3   | CH <sub>3</sub> COOLi            | CHCl <sub>3</sub> | -               | Trace              | -               |
| 4     | C4   | CH <sub>3</sub> COOLi            | CHCl <sub>3</sub> | -               | n.d.               | -               |
| 5     | C5   | CH <sub>3</sub> COOLi            | CHCl <sub>3</sub> | 5:1             | 11%                | 24%             |
| 6     | C6   | CH <sub>3</sub> COOLi            | CHCl <sub>3</sub> | -               | n.d.               | -               |
| 7     | C7   | CH <sub>3</sub> COOLi            | CHCl <sub>3</sub> | 6:1             | 45%                | 33%             |
| 8     | C7   | NH <sub>4</sub> HCO <sub>3</sub> | CHCl <sub>3</sub> | 10:1            | 85%                | 67%             |
| 9     | C7   | NaHCO <sub>3</sub>               | CHCl <sub>3</sub> | 4:1             | 81%                | 0%              |
| 10    | C7   | NH <sub>4</sub> HCO <sub>3</sub> | Et <sub>2</sub> O | 5:1             | 36%                | 55%             |
| 11    | C7   | NH <sub>4</sub> HCO <sub>3</sub> | THF               | 11:1            | 84%                | 4%              |
| 12    | C7   | NH <sub>4</sub> HCO <sub>3</sub> | DCM               | 4:1             | 12%                | 15%             |

Reaction condition: **1a** (0.075 mmol), **2a** (0.05 mmol), catalyst (0.01 mmol) and base (0.1 mmol) in solvent (0.5 mL). <sup>a</sup> Dr were determined via the ratio of the integration of the *N*-Me peaks from <sup>1</sup>H NMR of the crude product. <sup>b</sup> Isolated yield. <sup>c</sup> Enantiomeric excesses were determined by chiral HPLC analysis.

### Procedure for synthesis of (+)-3aa

To a solution of the compound **1a** (34.8 mg, 0.075 mmol), **2a** (9.1 mg, 0.05 mmol),  $\text{NH}_4\text{HCO}_3$  (7.9 mg, 0.1 mmol) in  $\text{CHCl}_3$  (0.5 mL) was added chiral catalyst (5.5 mg, 0.01 mmol) and the reaction was stirred at room temperature for 3 d. The reaction mixture was directly charged to column chromatography on silica gel to give the (+)-**3aa** (26 mg, 85%).

### HPLC of compound **3aa**

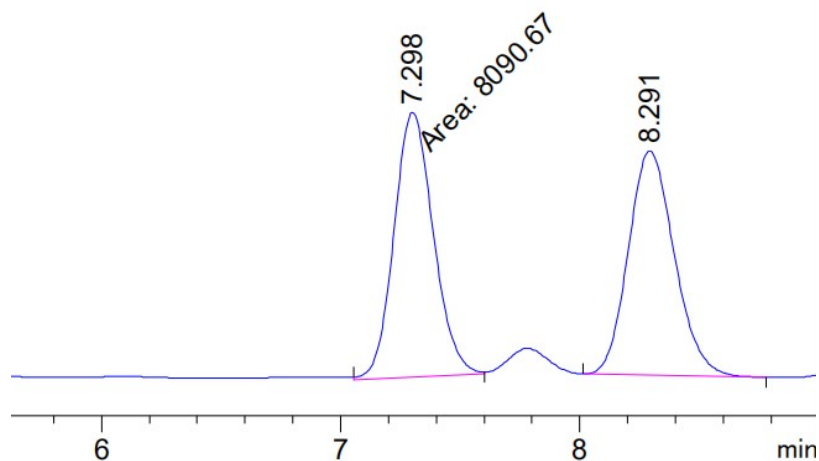

| Peak # | RetTime [min] | Type | Width [min] | Area [mAU*s] | Height [mAU] | Area %  |
|--------|---------------|------|-------------|--------------|--------------|---------|
| 1      | 7.298         | MM   | 0.1903      | 8090.66504   | 708.67883    | 50.1590 |
| 2      | 8.291         | BB   | 0.2060      | 8039.38037   | 601.26843    | 49.8410 |

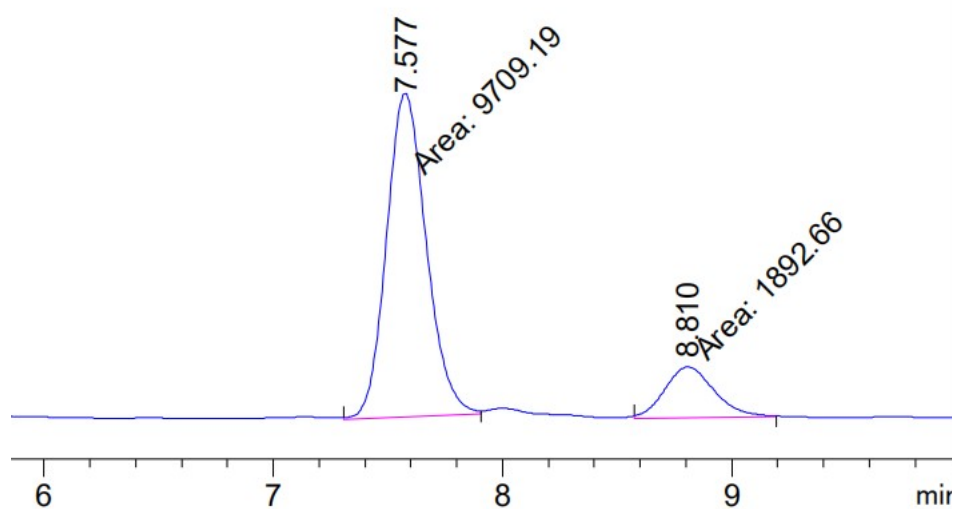

---

| Peak # | RetTime [min] | Type | Width [min] | Area [mAU*s] | Height [mAU] | Area %  |
|--------|---------------|------|-------------|--------------|--------------|---------|
| 1      | 7.577         | MM   | 0.2011      | 9709.19043   | 804.74359    | 83.6866 |
| 2      | 8.810         | MM   | 0.2507      | 1892.66101   | 125.82281    | 16.3134 |

### 3. Reference

[1] J. Wang, X. Pan, J. Liu, L. Zhao, Y. Zhi, K. Zhao and L. Hu, Diastereoselective Synthesis of Tetrahydroquinolines via [4 + 2] Annulation between in Situ Generated *p*-Quinone Methides and Nitroalkenes, *Org. Lett.* 2018, **20**, 5995.

[2] K. Zhao, Y. Zhi, T. Shu, A. Valkonen, K. Rissanen and D. Enders, Organocatalytic Domino Oxa-Michael/1,6-Addition Reactions: Asymmetric Synthesis of Chromans Bearing Oxindole Scaffolds, *Angew. Chem., Int. Ed.* 2016, **55**, 12104.

#### 4. Crystallographic data of 3ja

Crystallographic data have been deposited with the Cambridge Crystallographic Data Centre as supplementary publication nos. CCDC-2110859 (**3ja**), Copies of these data can be obtained free of charge from the Cambridge Crystallographic Data Centre via [www.ccdc.cam.ac.uk/data\\_request/cif](http://www.ccdc.cam.ac.uk/data_request/cif).

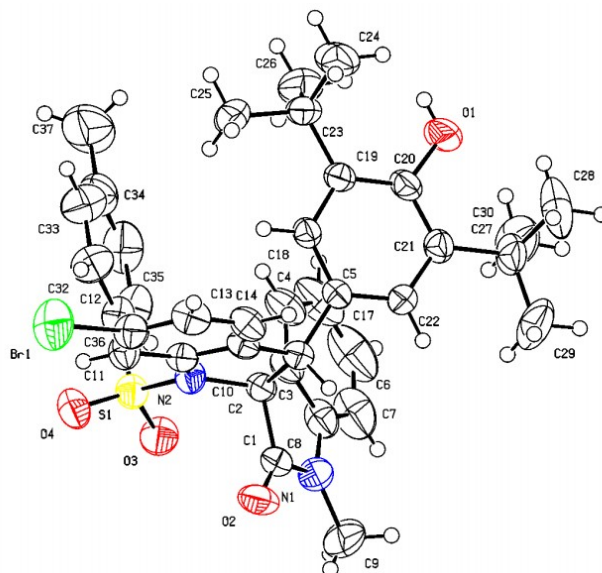

**STable 1.** Crystal data and structure refinement for **3ja**.

|                                        |                                                                   |
|----------------------------------------|-------------------------------------------------------------------|
| Identification code                    | <b>3ja</b>                                                        |
| Empirical formula                      | C <sub>37</sub> H <sub>39</sub> BrN <sub>2</sub> O <sub>4</sub> S |
| Formula weight                         | 687.67                                                            |
| Temperature/K                          | 293(2)                                                            |
| Crystal system                         | triclinic                                                         |
| Space group                            | P-1                                                               |
| a/Å                                    | 11.0140(4)                                                        |
| b/Å                                    | 11.3559(5)                                                        |
| c/Å                                    | 14.3441(7)                                                        |
| $\alpha$ /°                            | 83.796(4)                                                         |
| $\beta$ /°                             | 86.279(4)                                                         |
| $\gamma$ /°                            | 75.024(4)                                                         |
| Volume/Å <sup>3</sup>                  | 1721.70(14)                                                       |
| Z                                      | 2                                                                 |
| $\rho$ calcg/cm <sup>3</sup>           | 1.326                                                             |
| $\mu$ /mm <sup>-1</sup>                | 2.519                                                             |
| F(000)                                 | 716.0                                                             |
| Crystal size/mm <sup>3</sup>           | 0.3 × 0.3 × 0.3                                                   |
| Radiation                              | Cu K $\alpha$ ( $\lambda$ = 1.54184)                              |
| 2 $\theta$ range for data collection/° | 6.202 to 133.19                                                   |
| Index ranges                           | -9 ≤ h ≤ 13, -13 ≤ k ≤ 13, -17 ≤ l ≤ 17                           |
| Reflections collected                  | 10358                                                             |

---

|                                             |                                       |
|---------------------------------------------|---------------------------------------|
| Independent reflections                     | 6079 [Rint = 0.0188, Rsigma = 0.0266] |
| Data/restraints/parameters                  | 6079/0/415                            |
| Goodness-of-fit on F2                       | 1.033                                 |
| Final R indexes [ $I \geq 2\sigma(I)$ ]     | R1 = 0.0438, wR2 = 0.1189             |
| Final R indexes [all data]                  | R1 = 0.0478, wR2 = 0.1227             |
| Largest diff. peak/hole / e Å <sup>-3</sup> | 0.50/-0.72                            |

## 5. Copies of NMR spectra

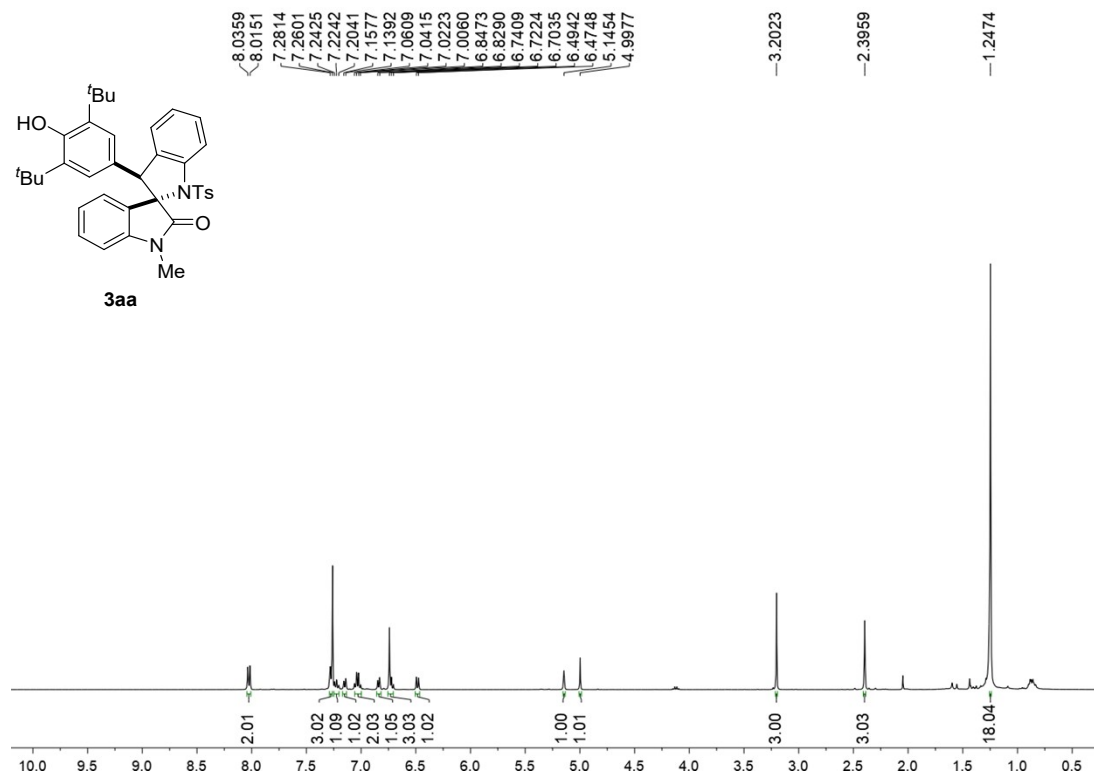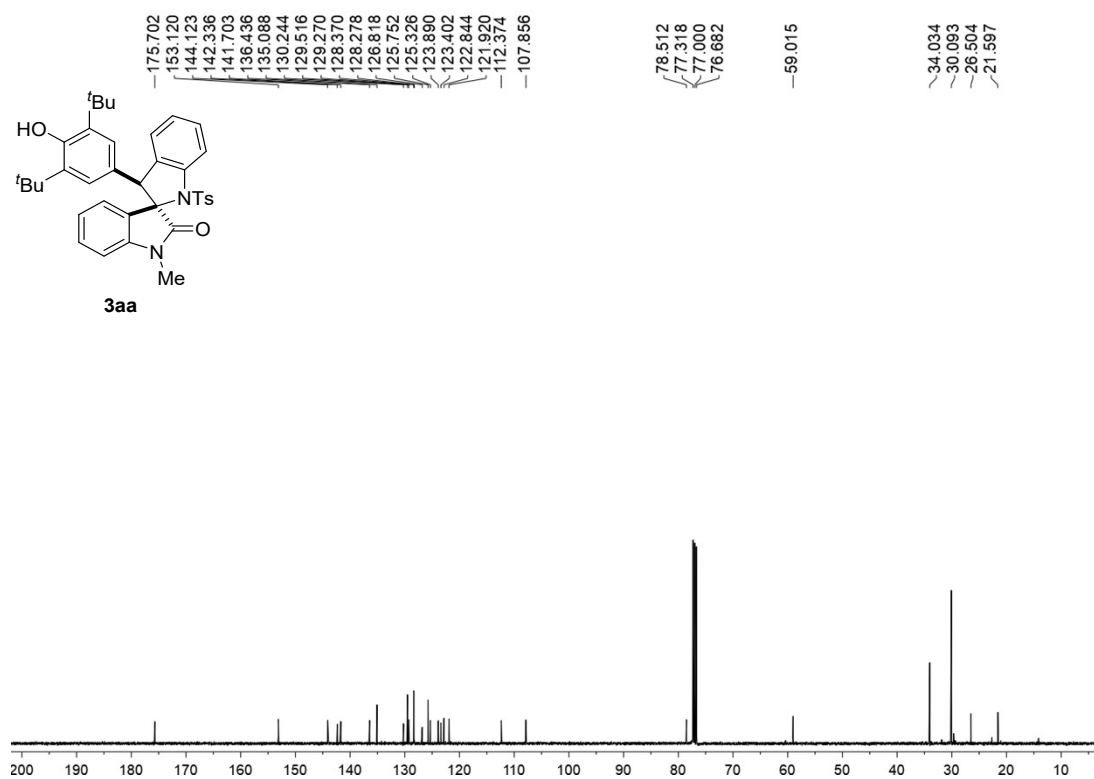

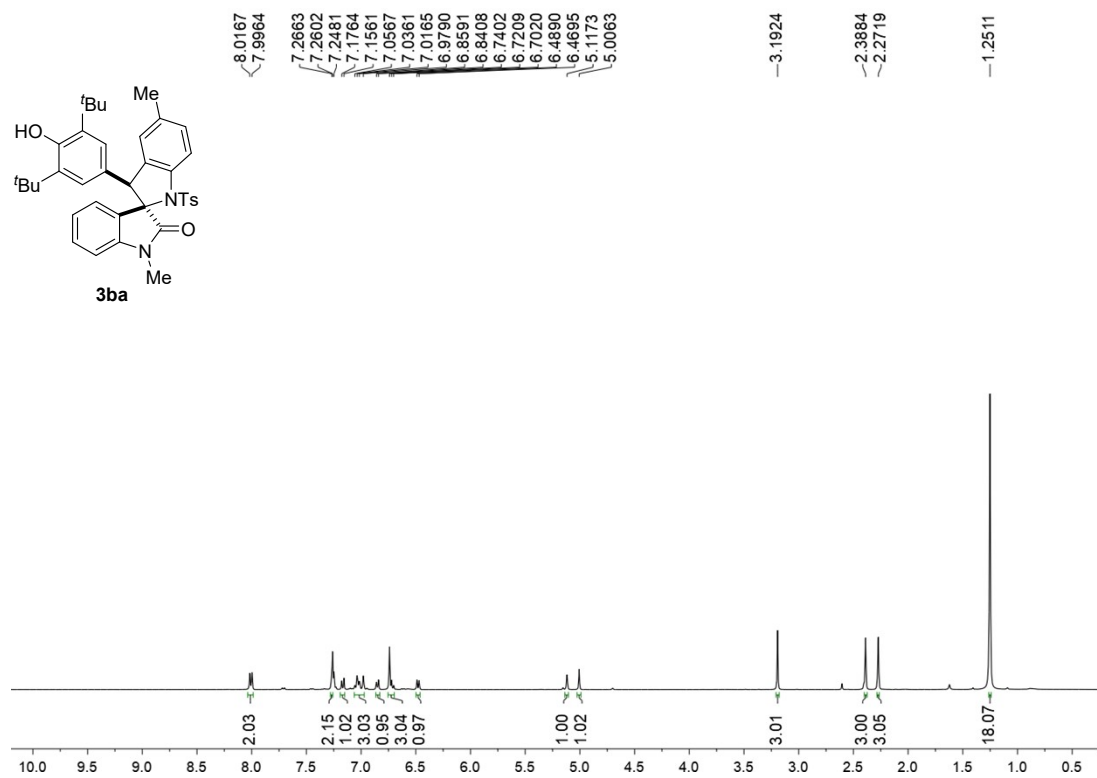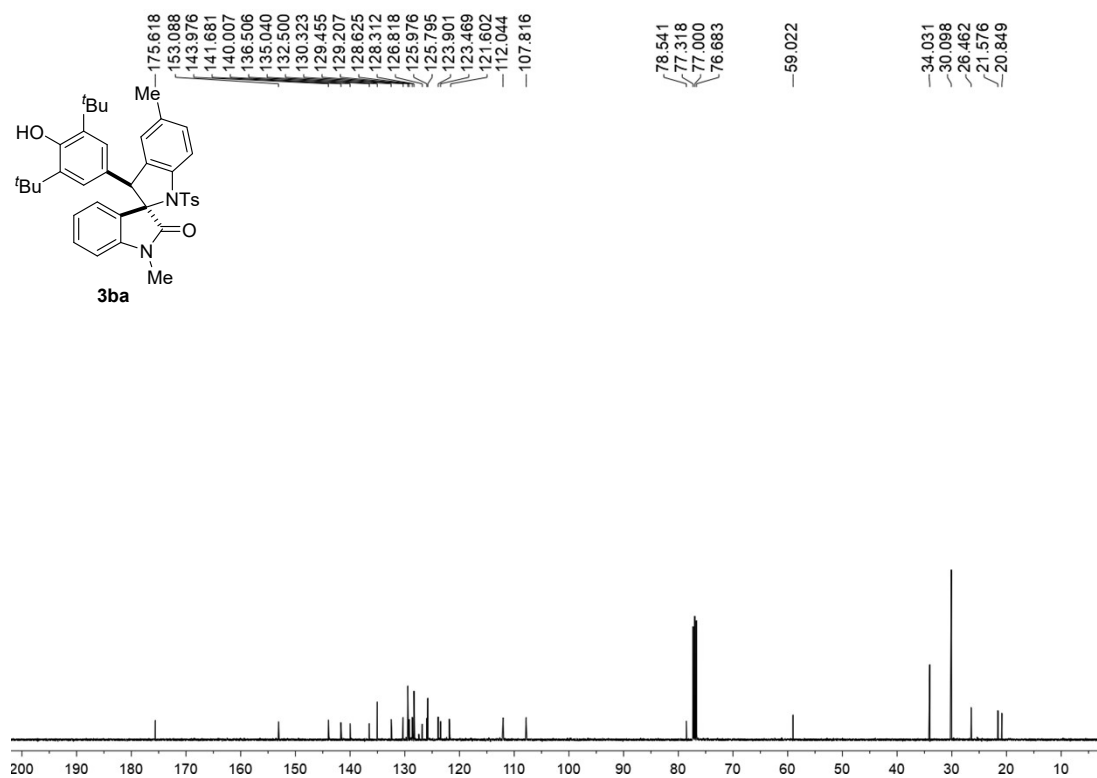



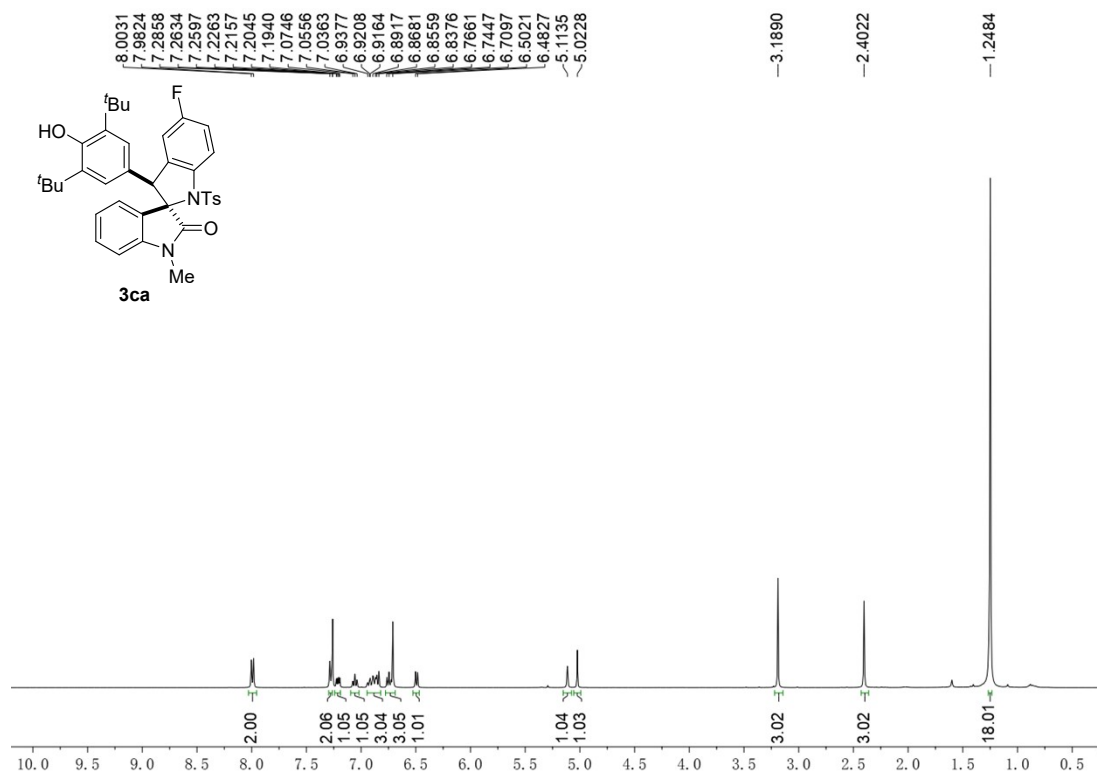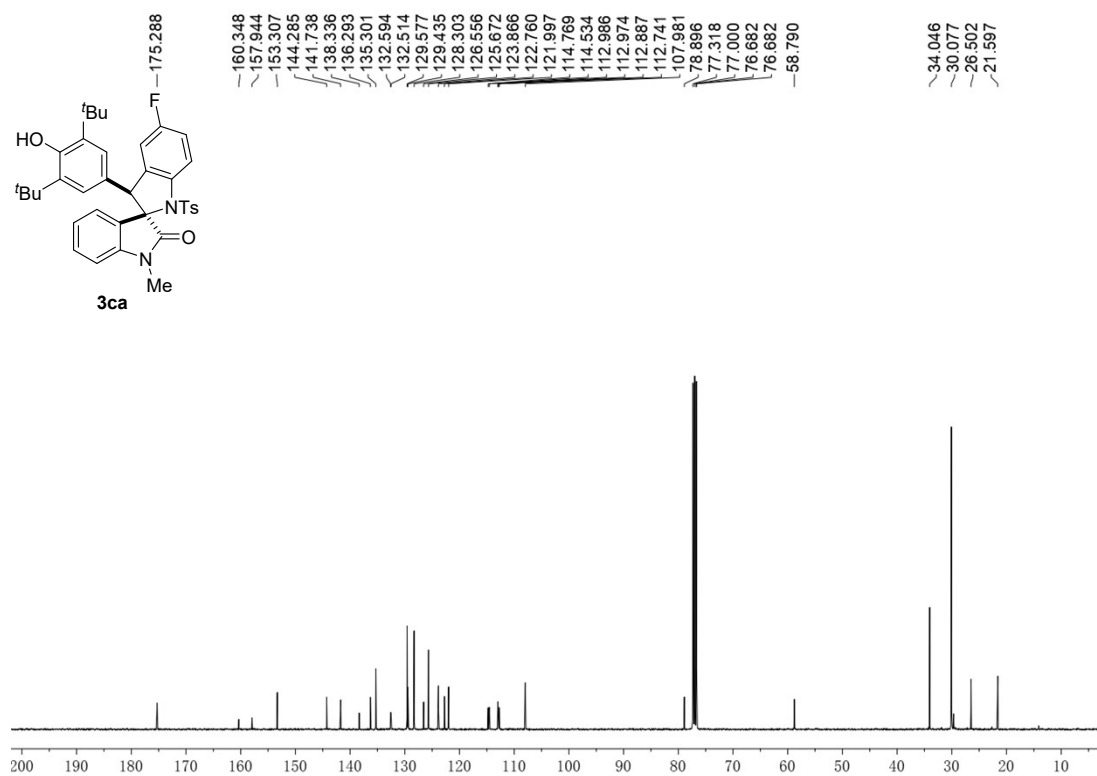

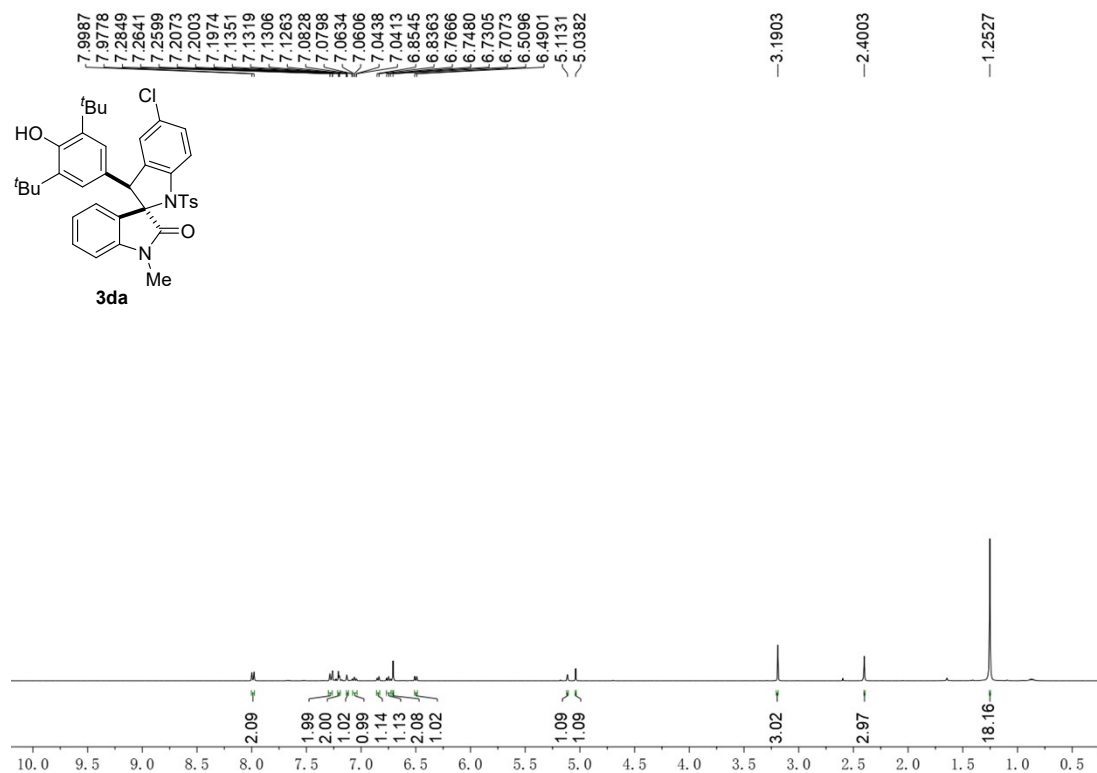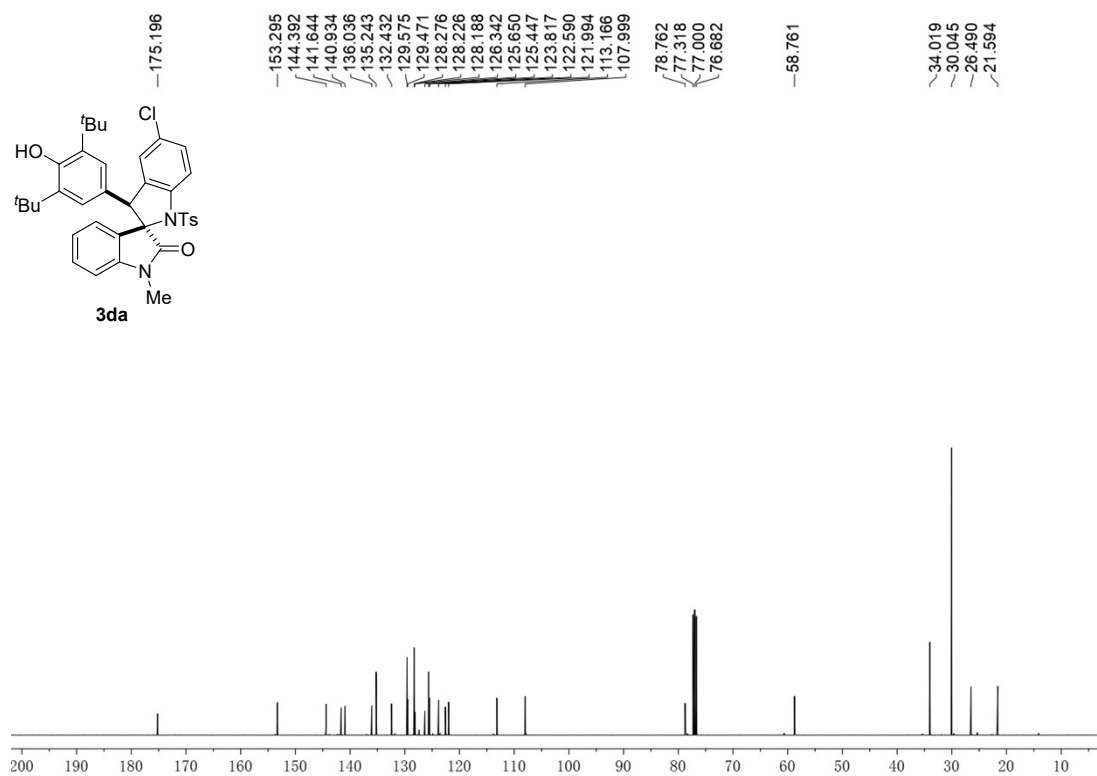

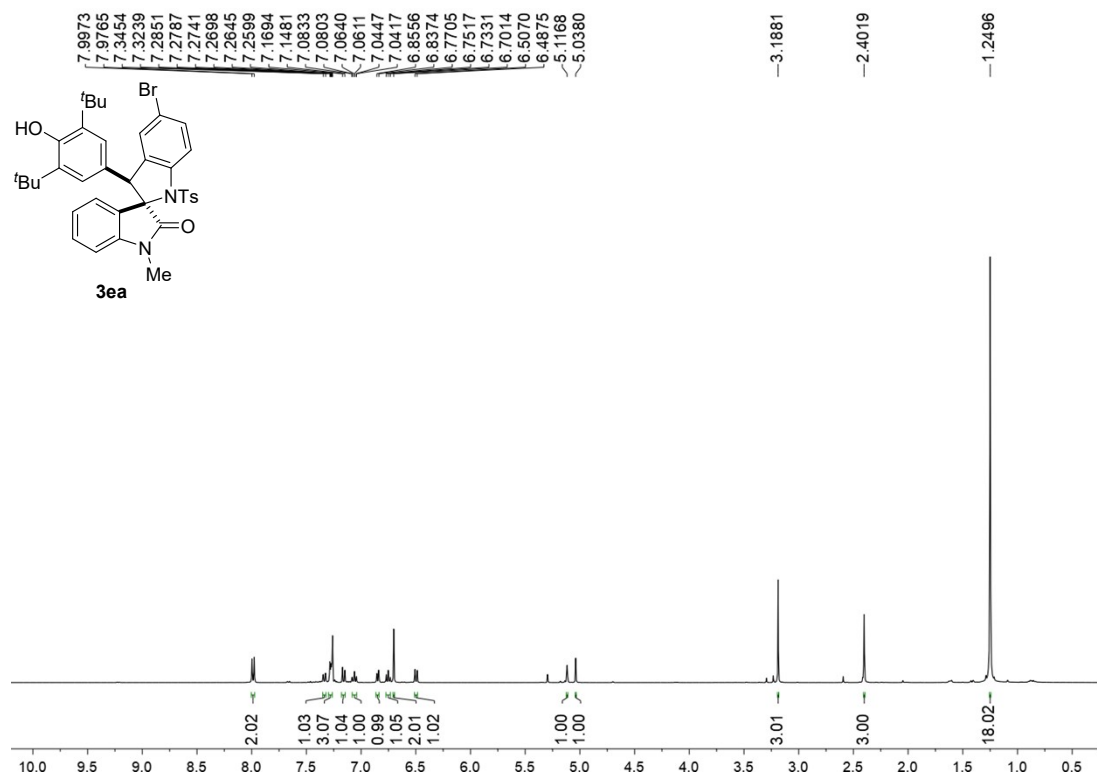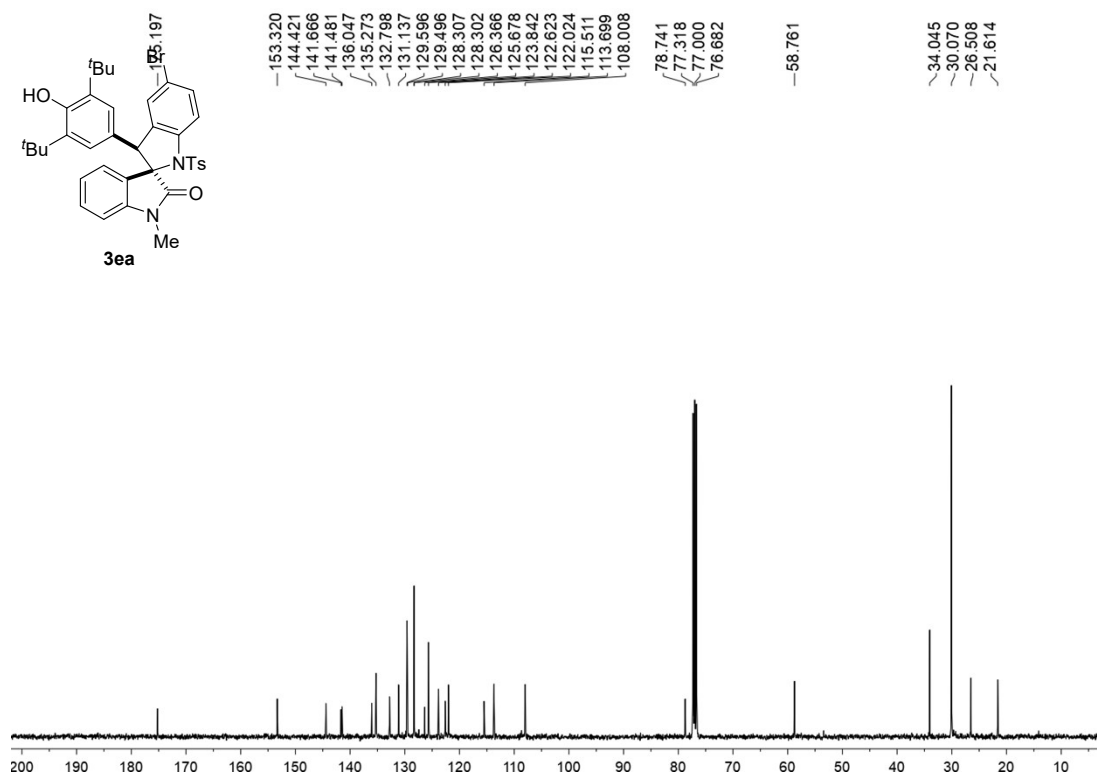

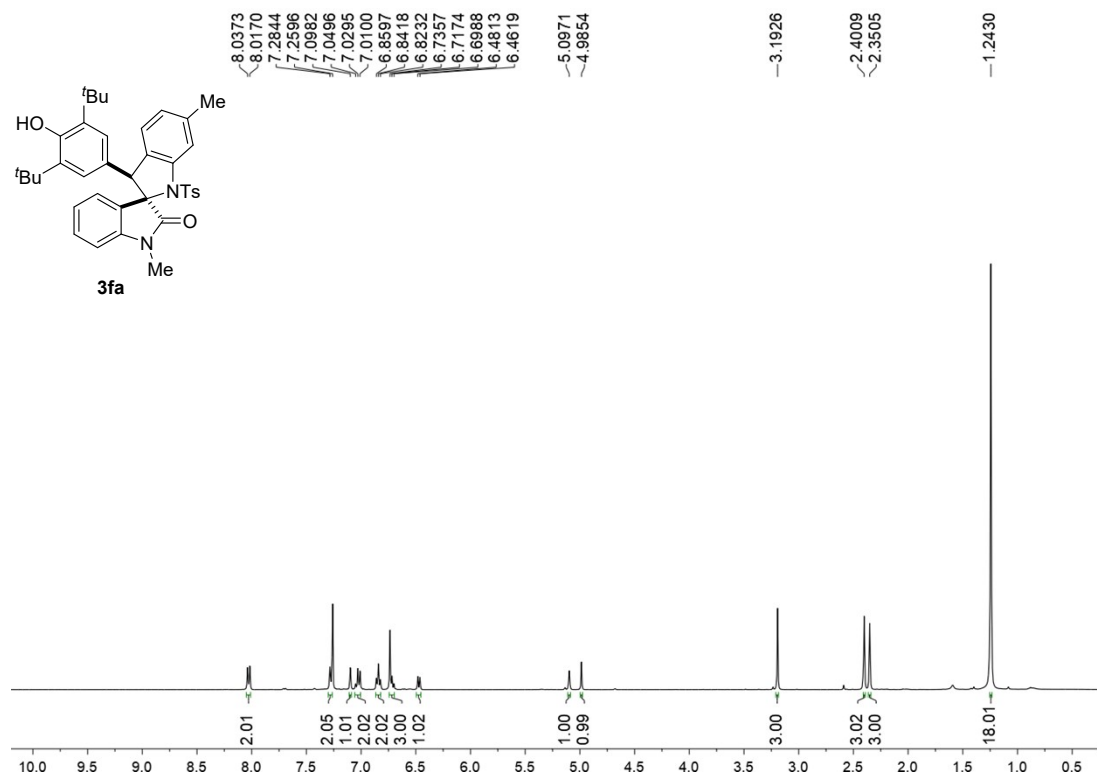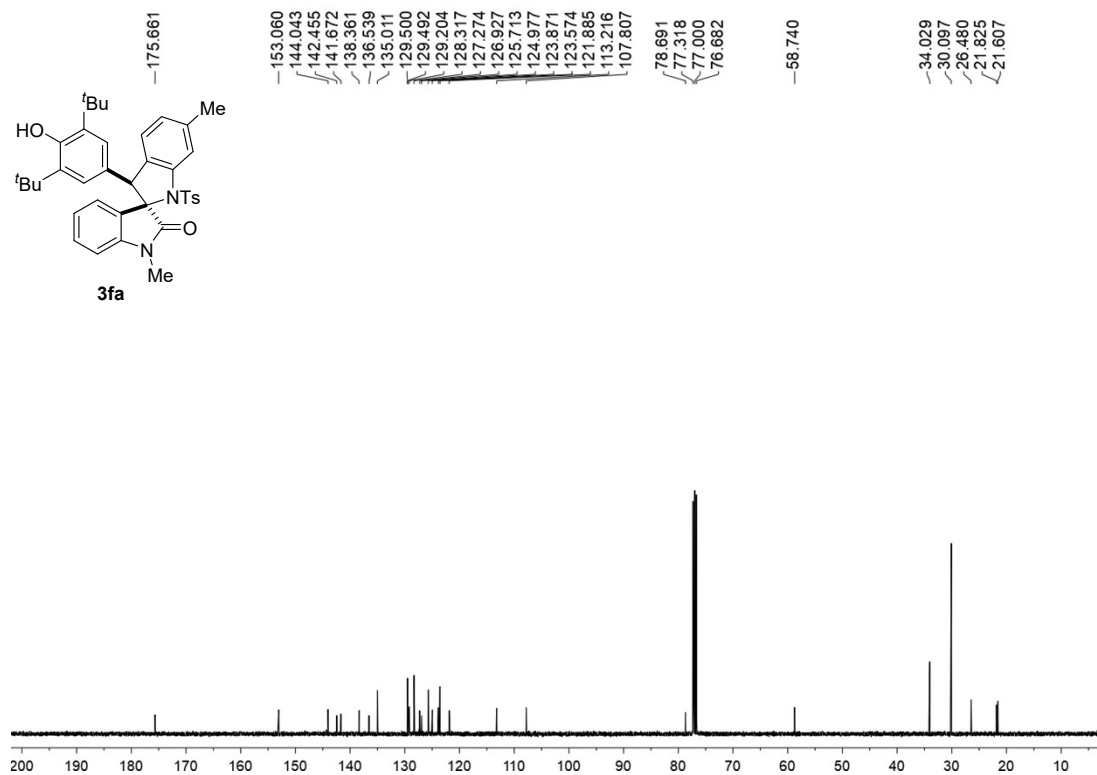

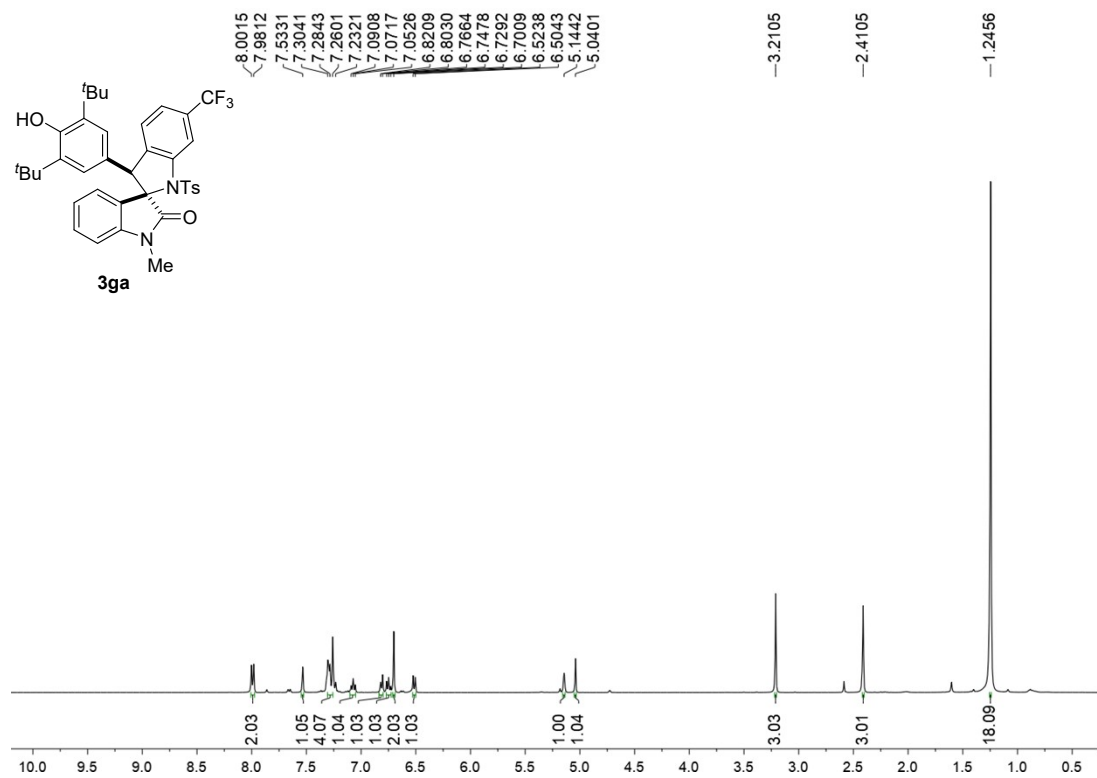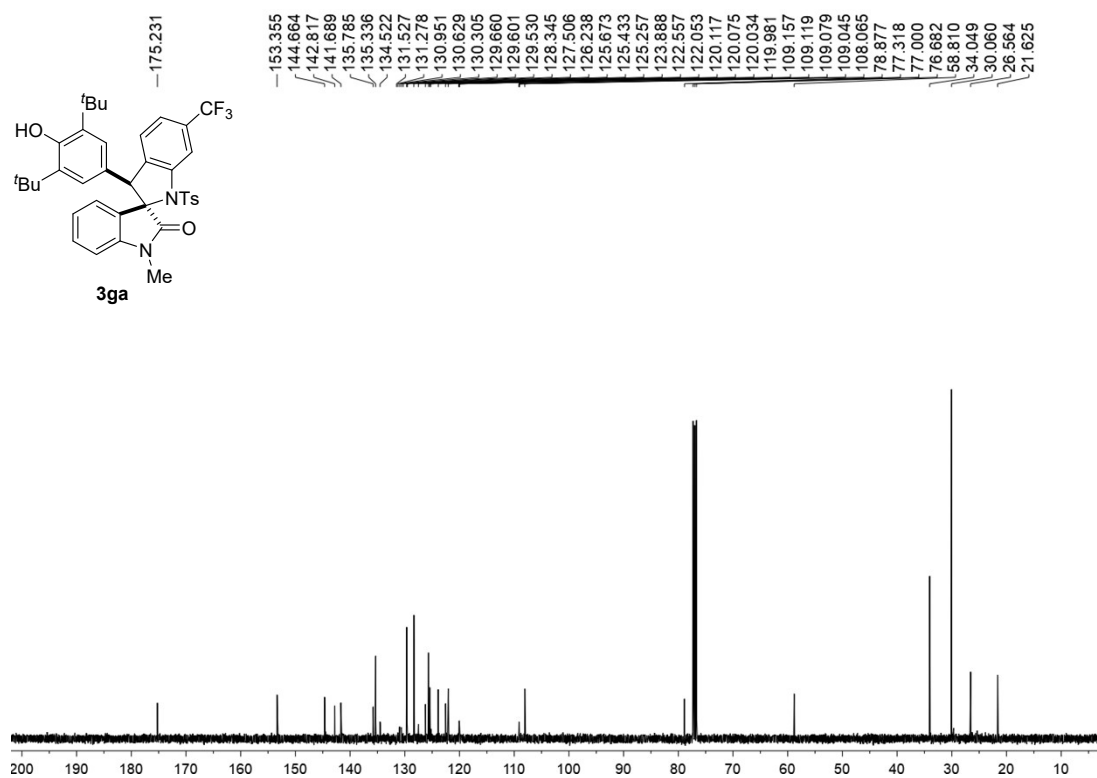

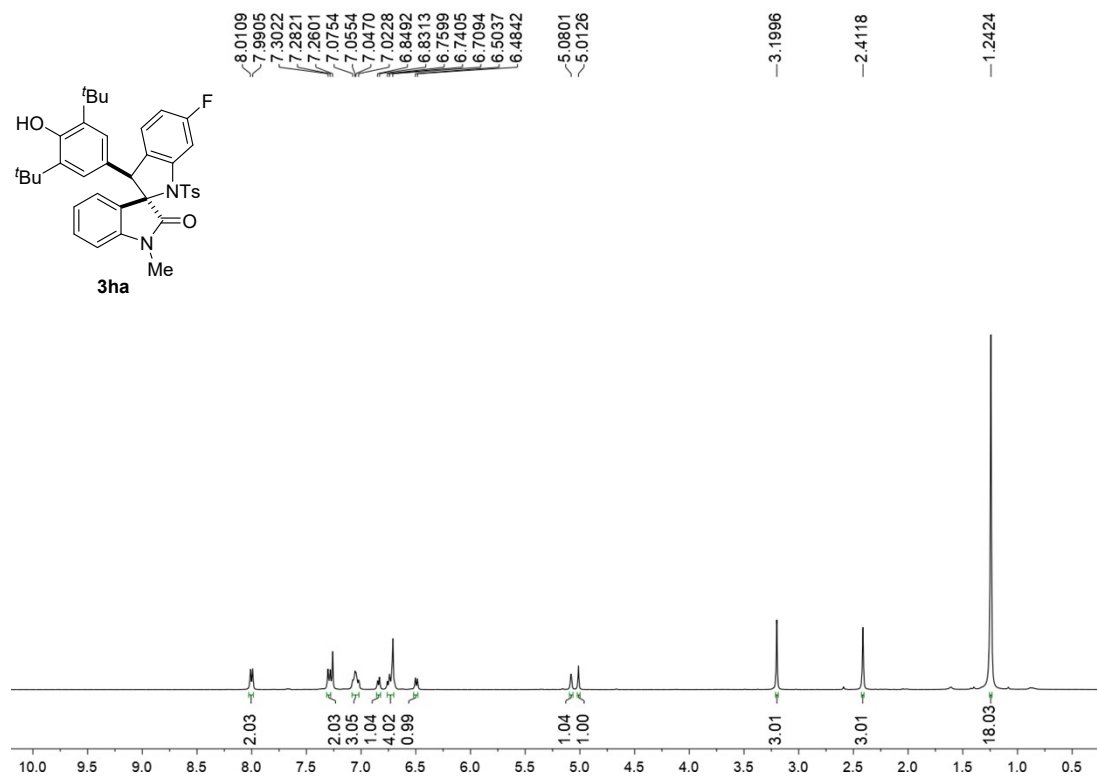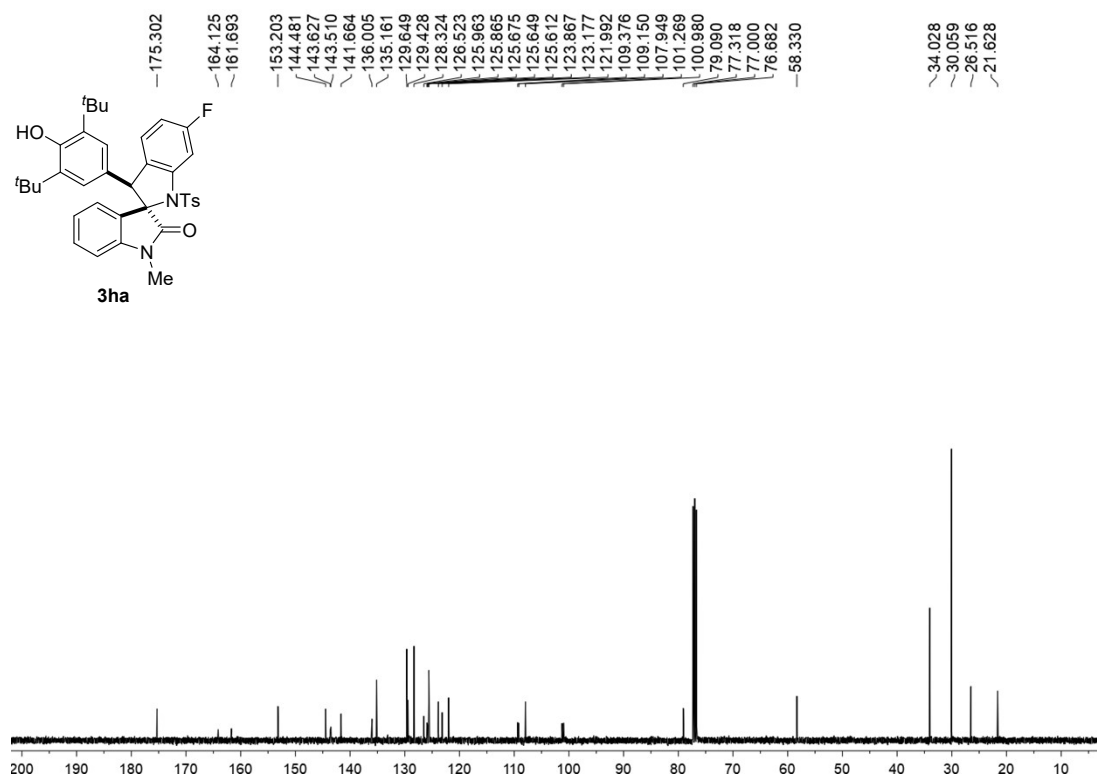

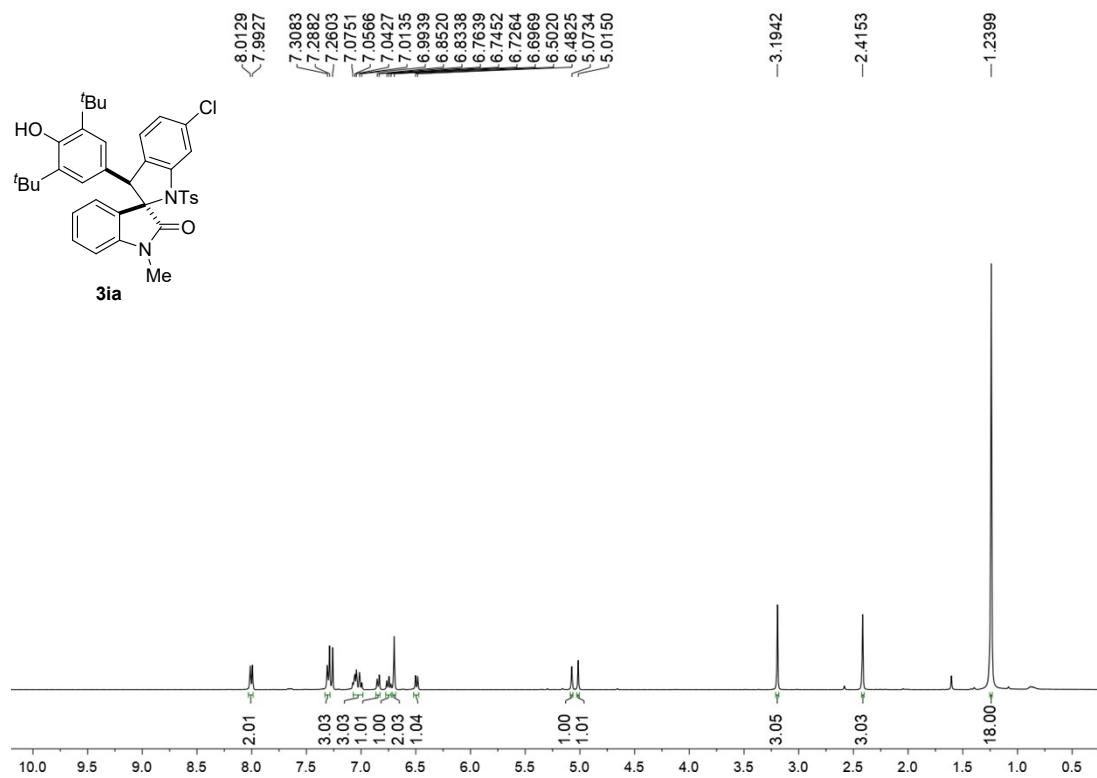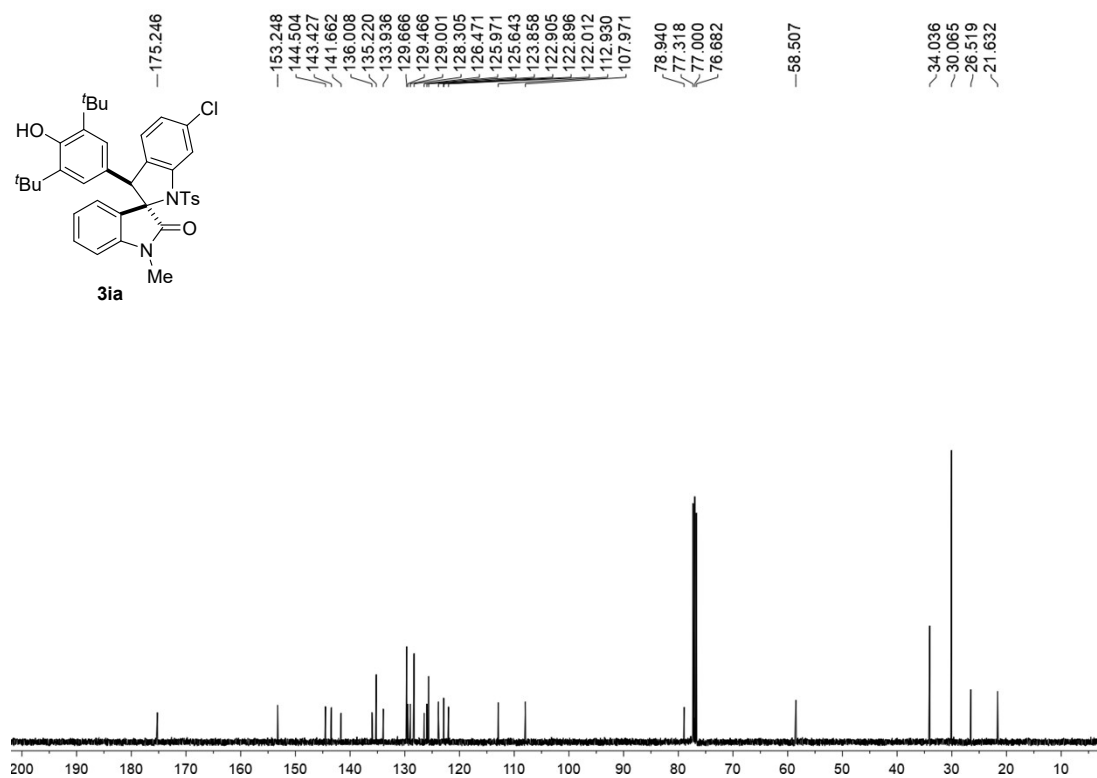

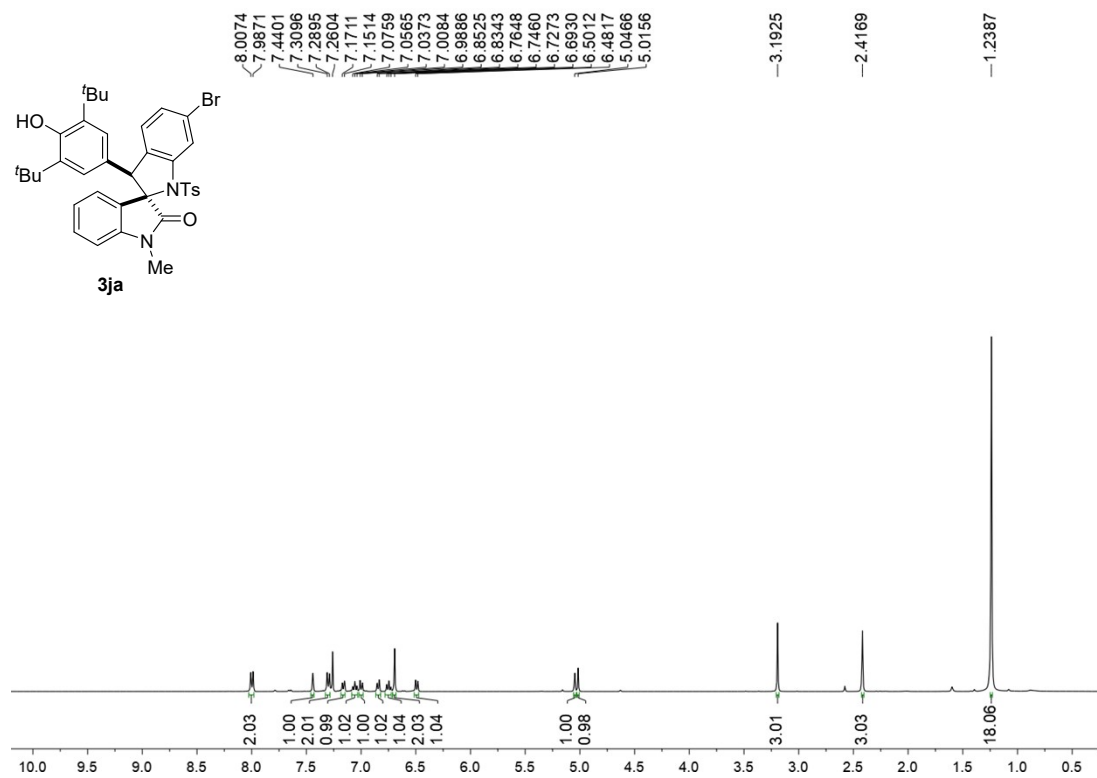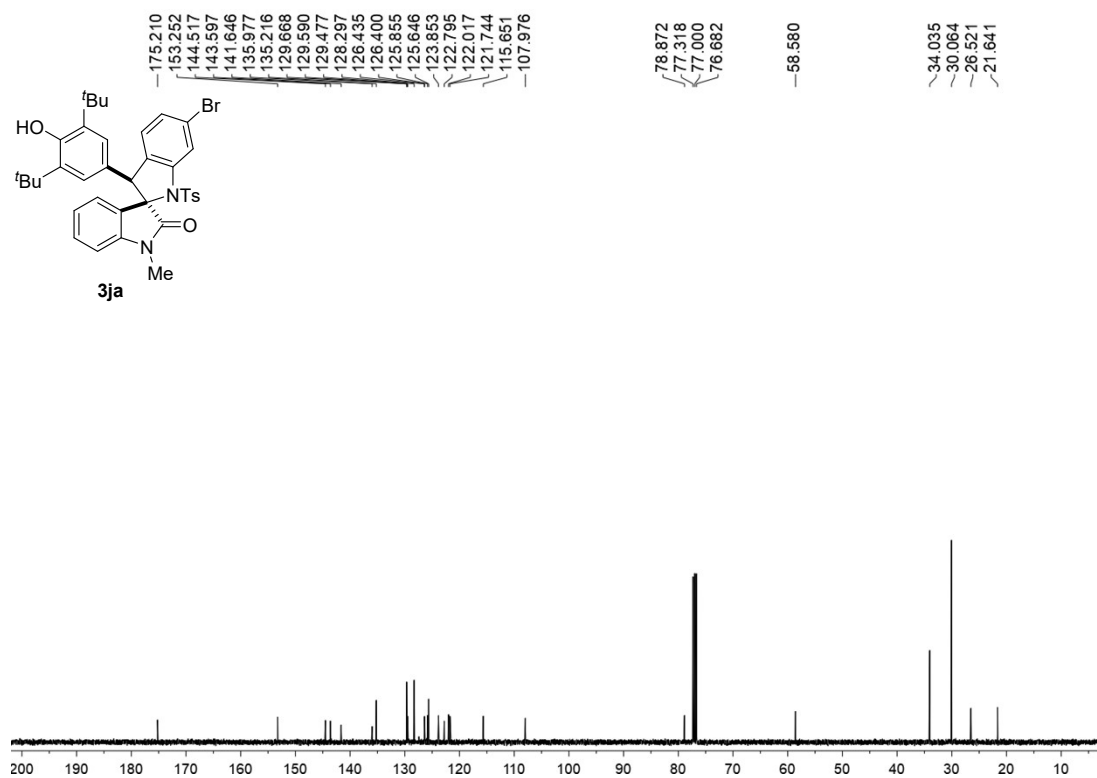



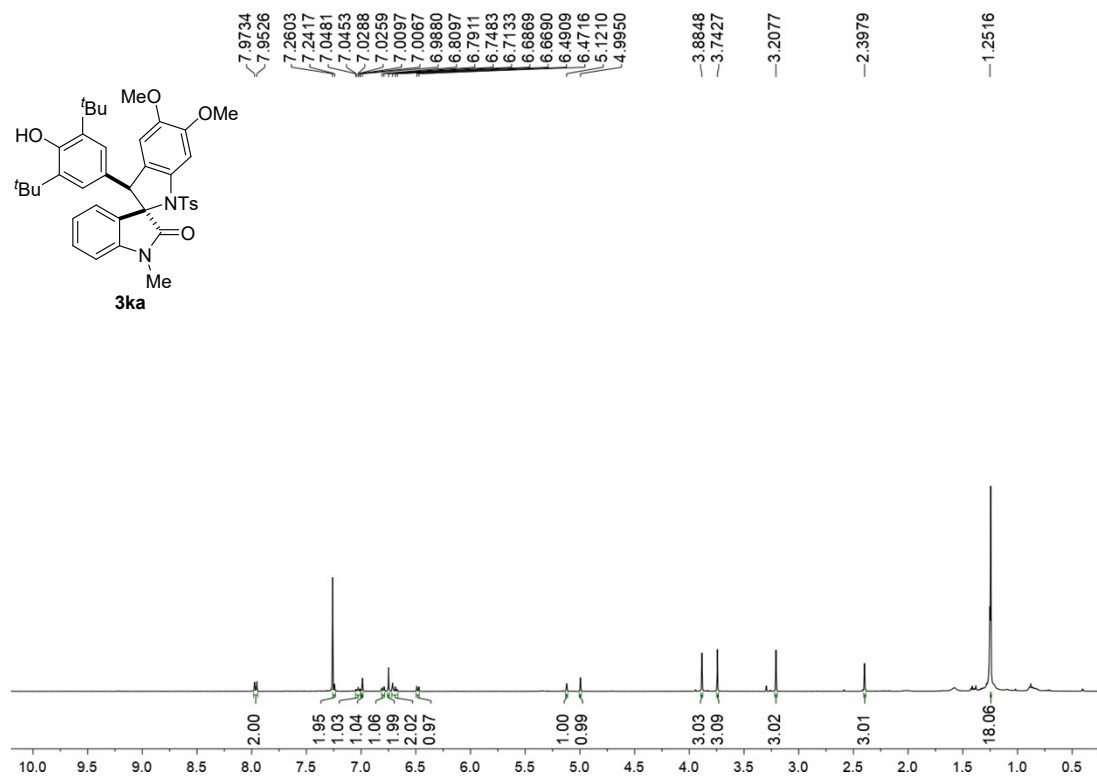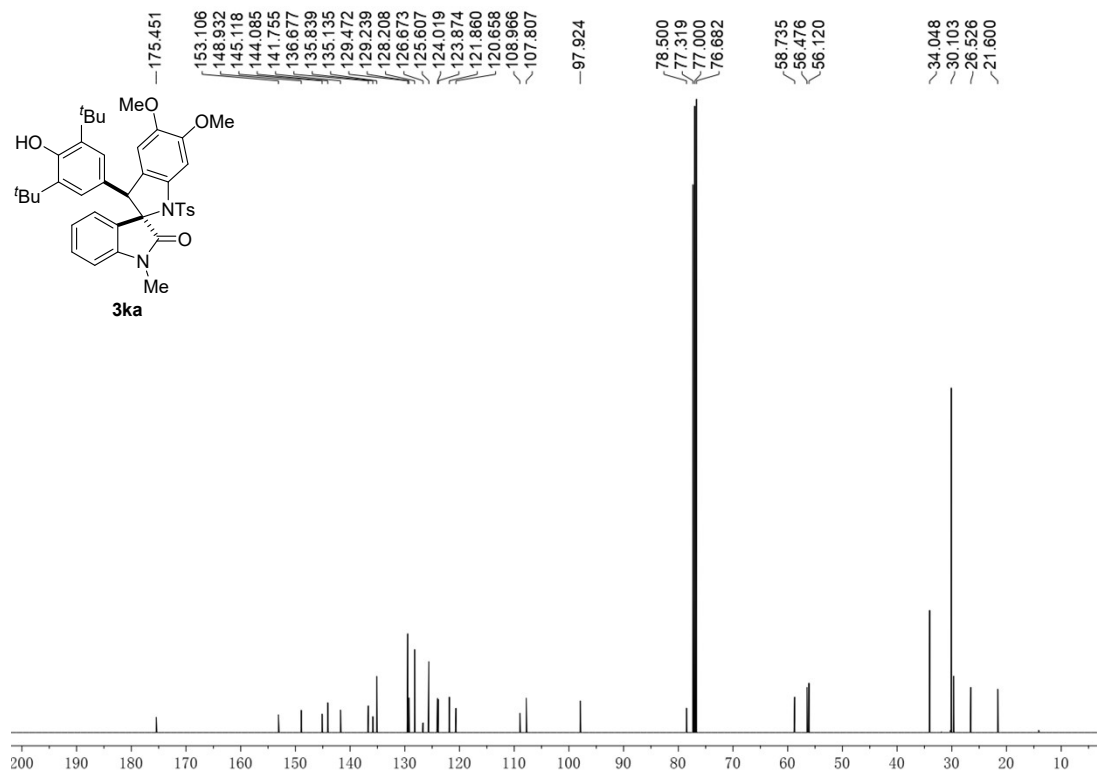

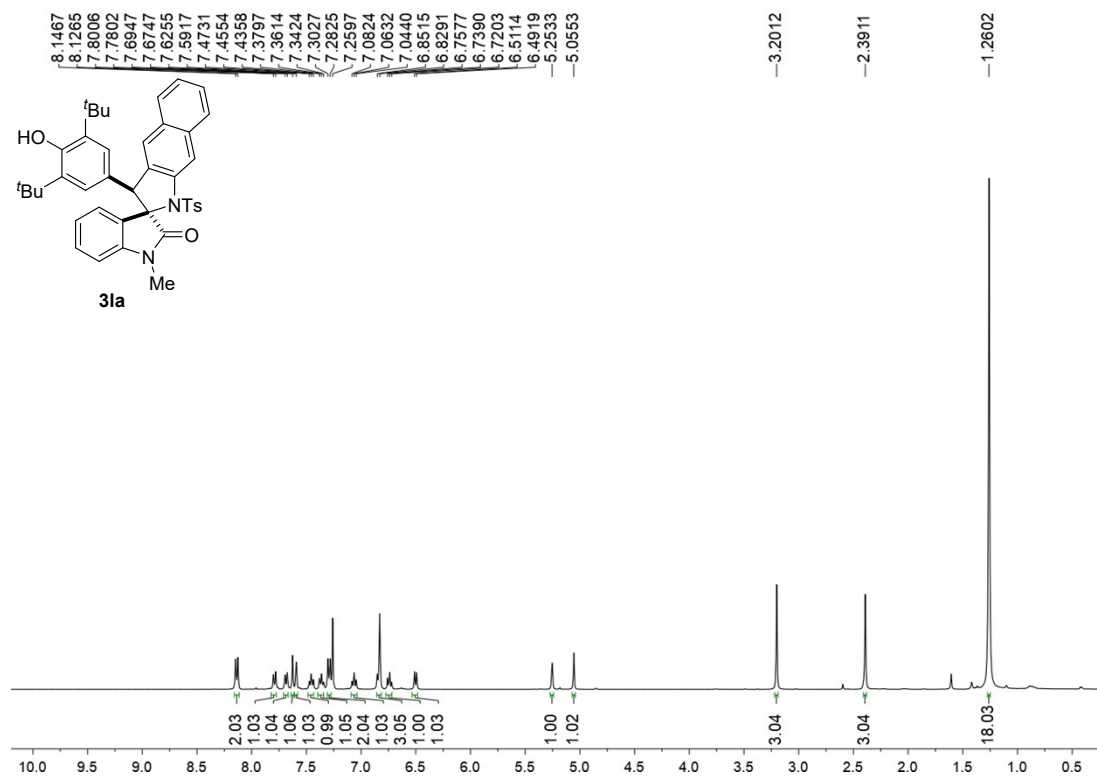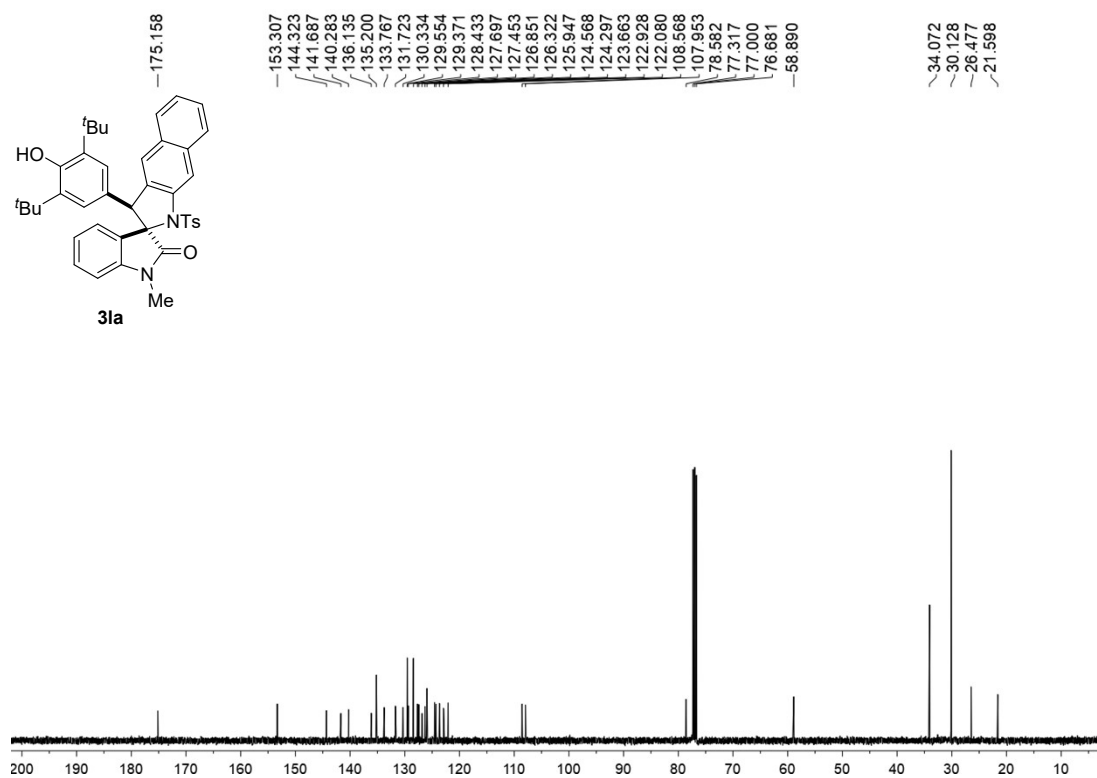

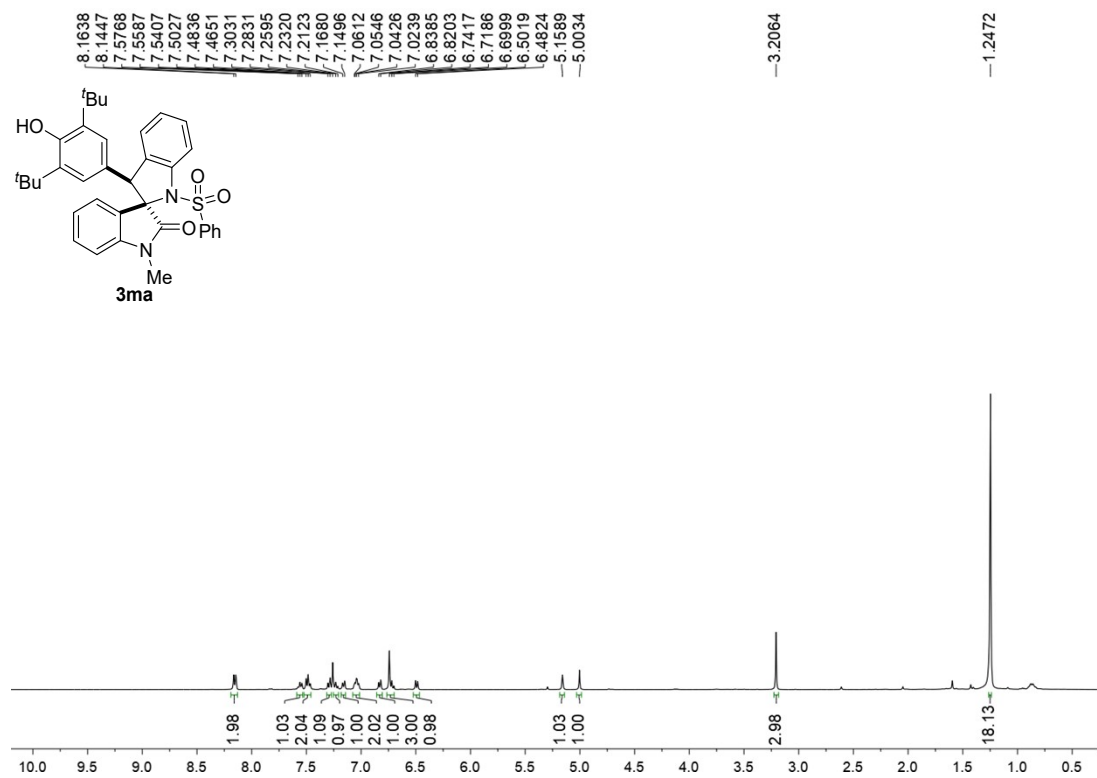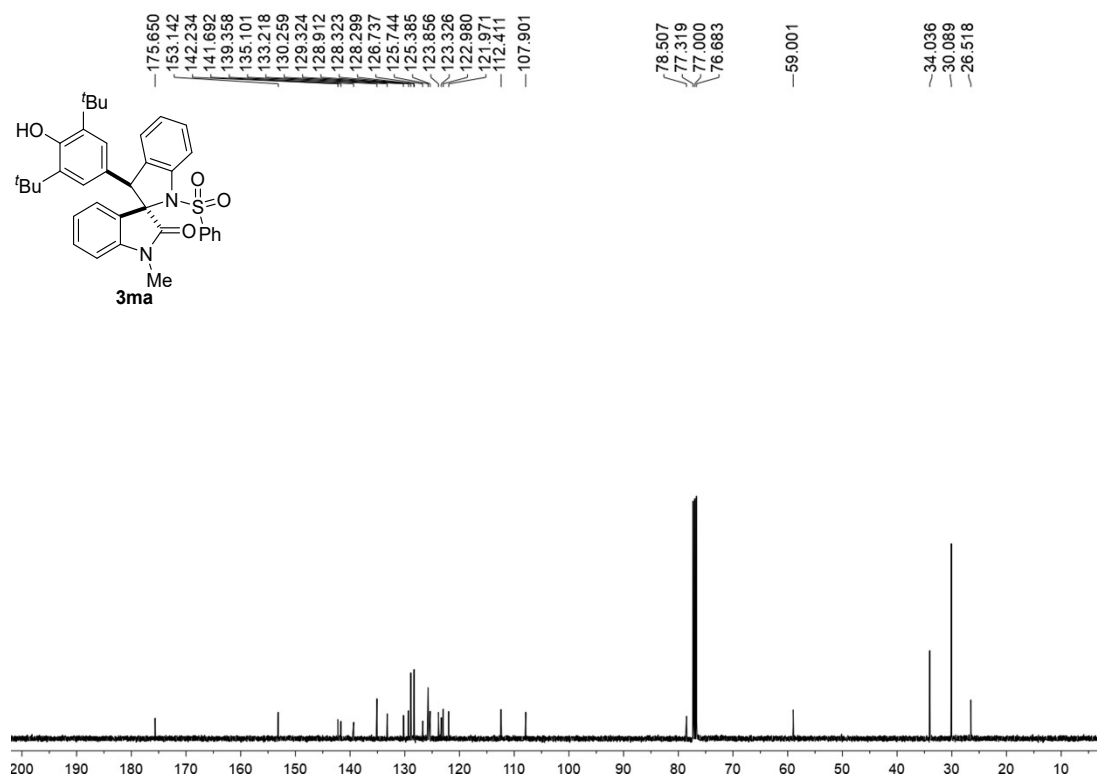

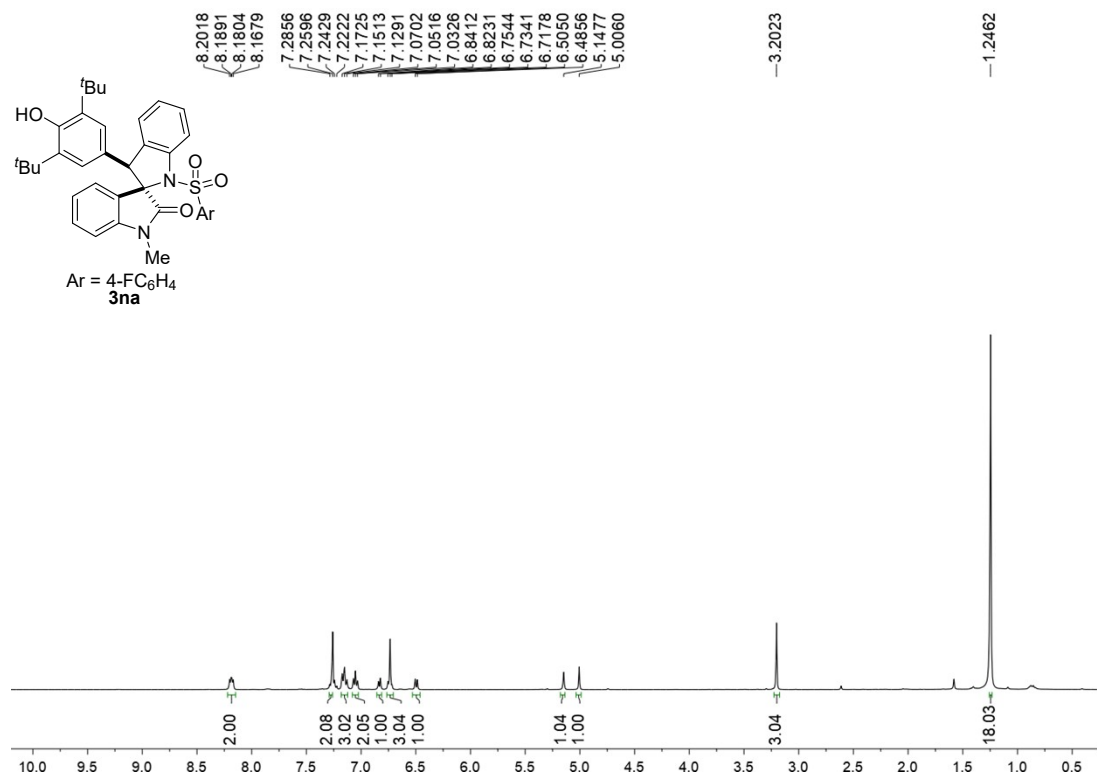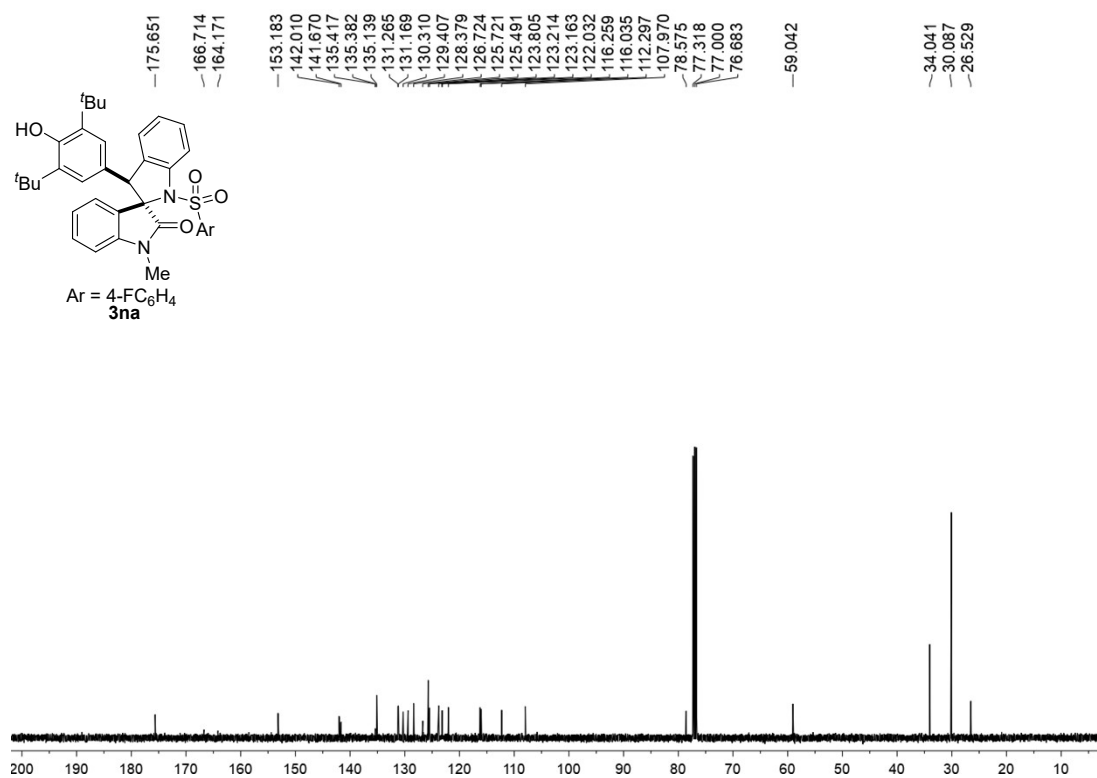

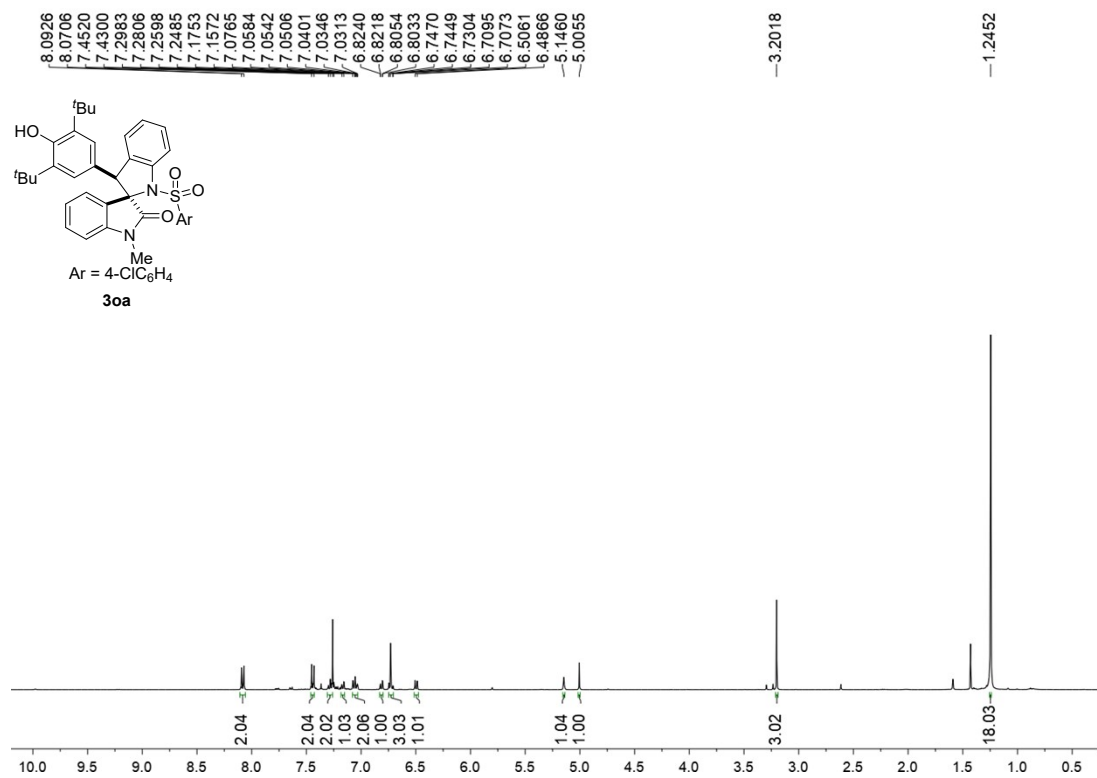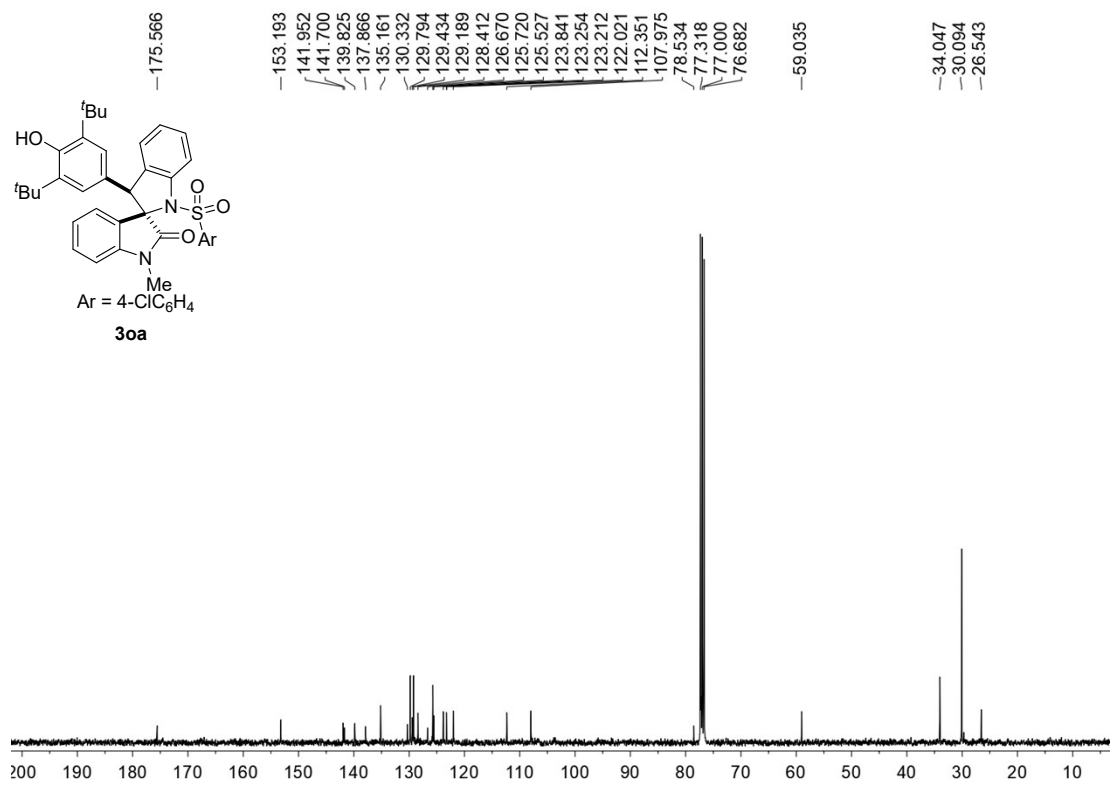

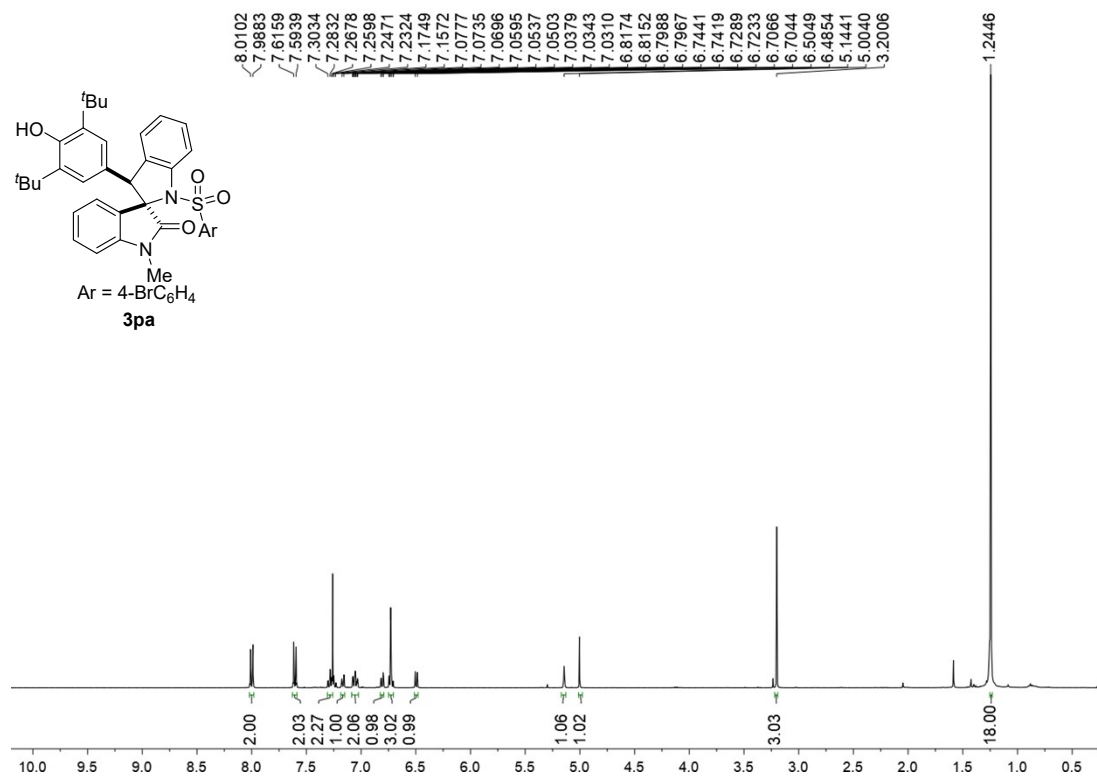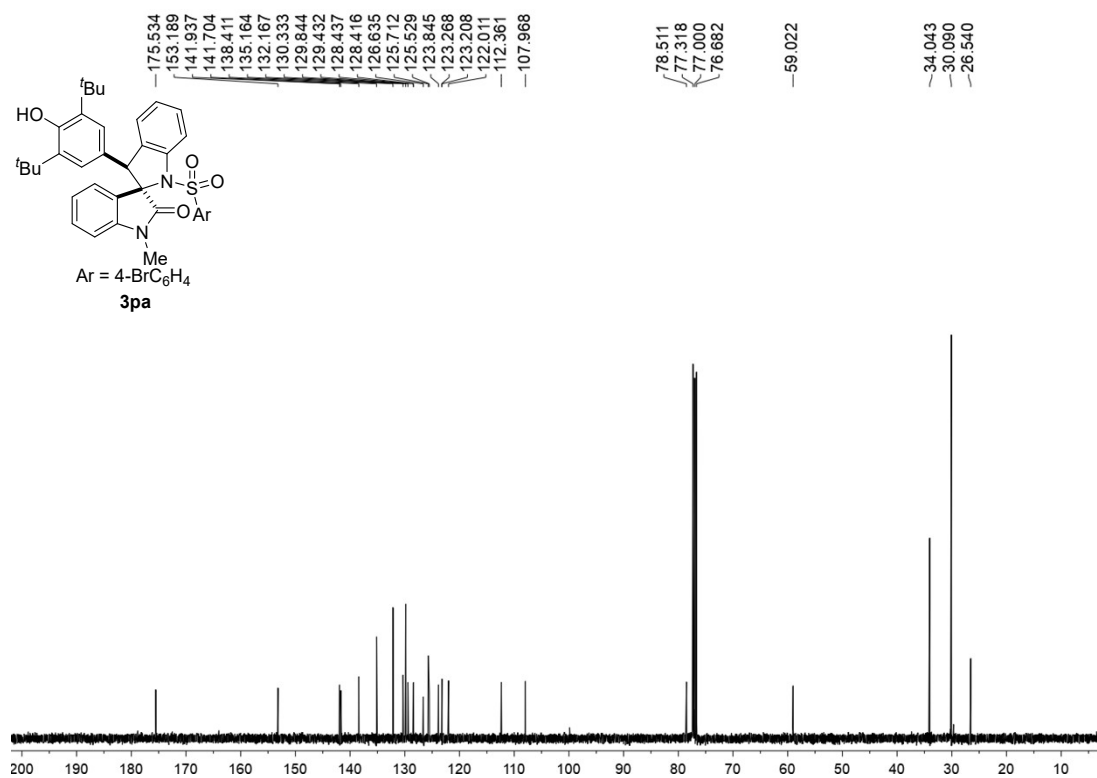

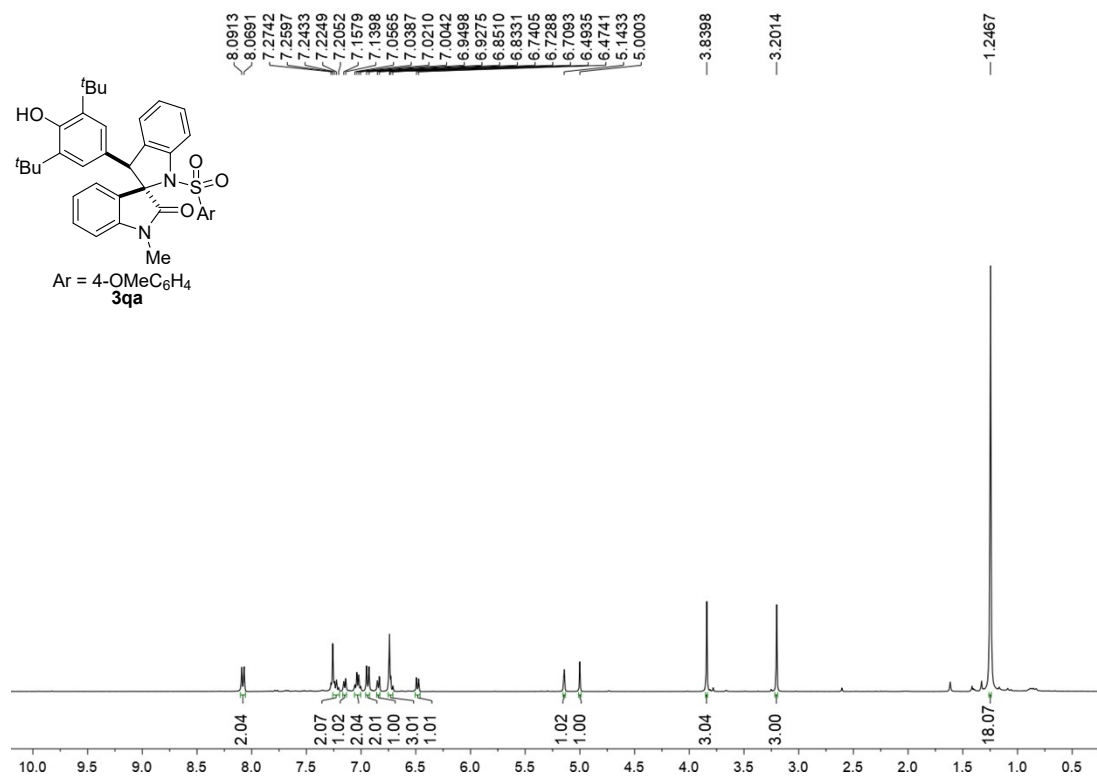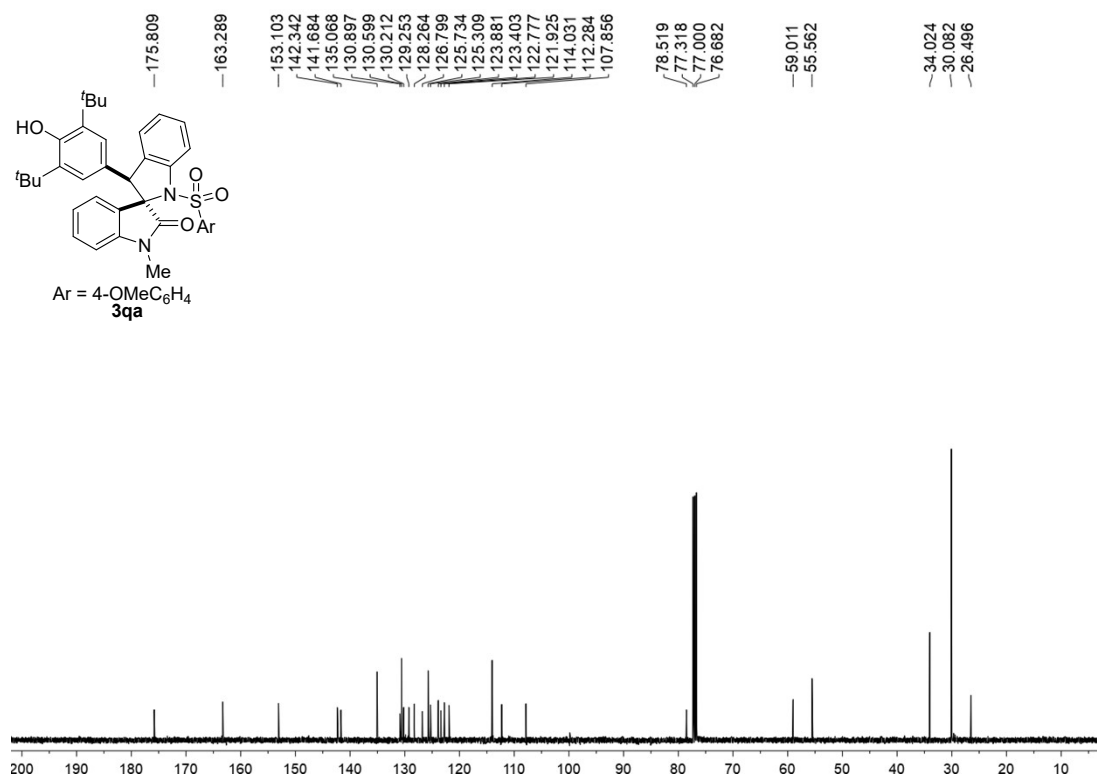

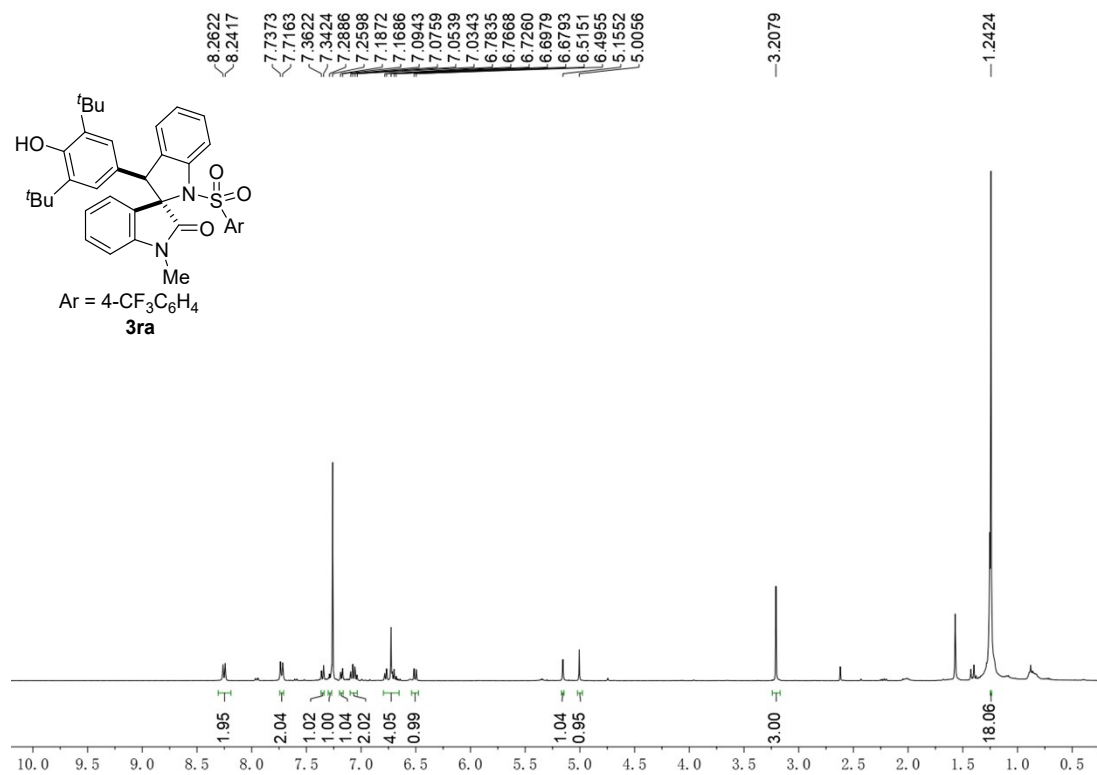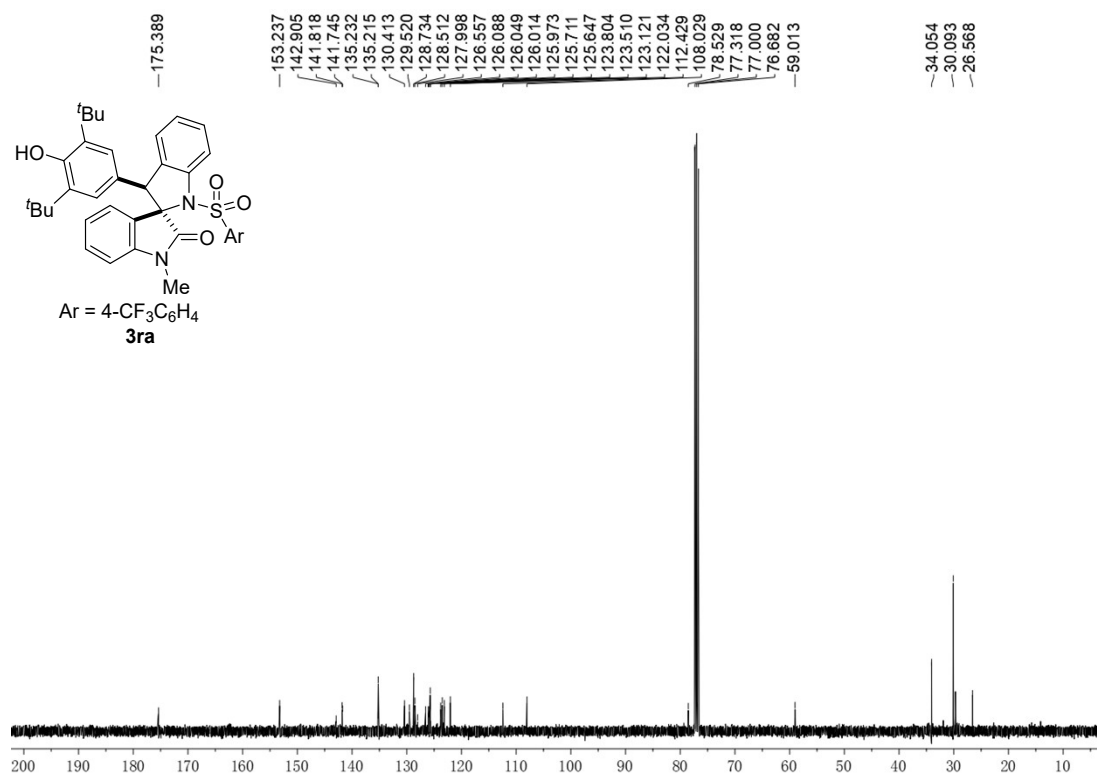



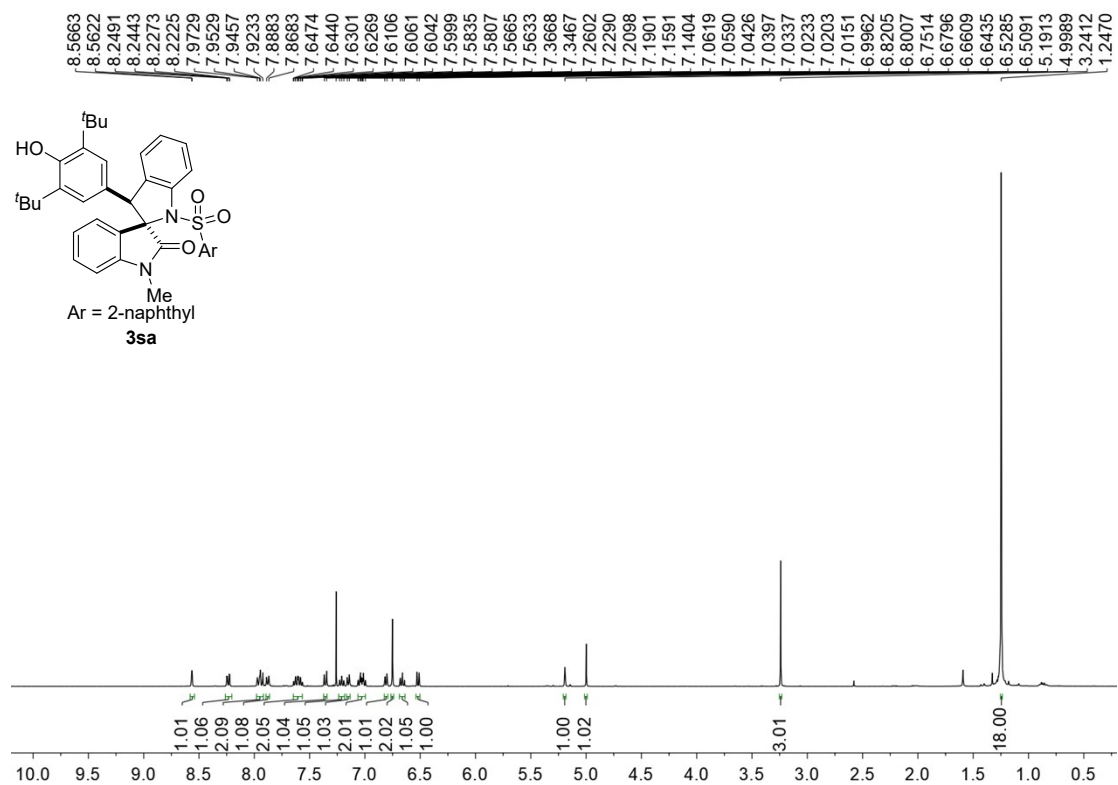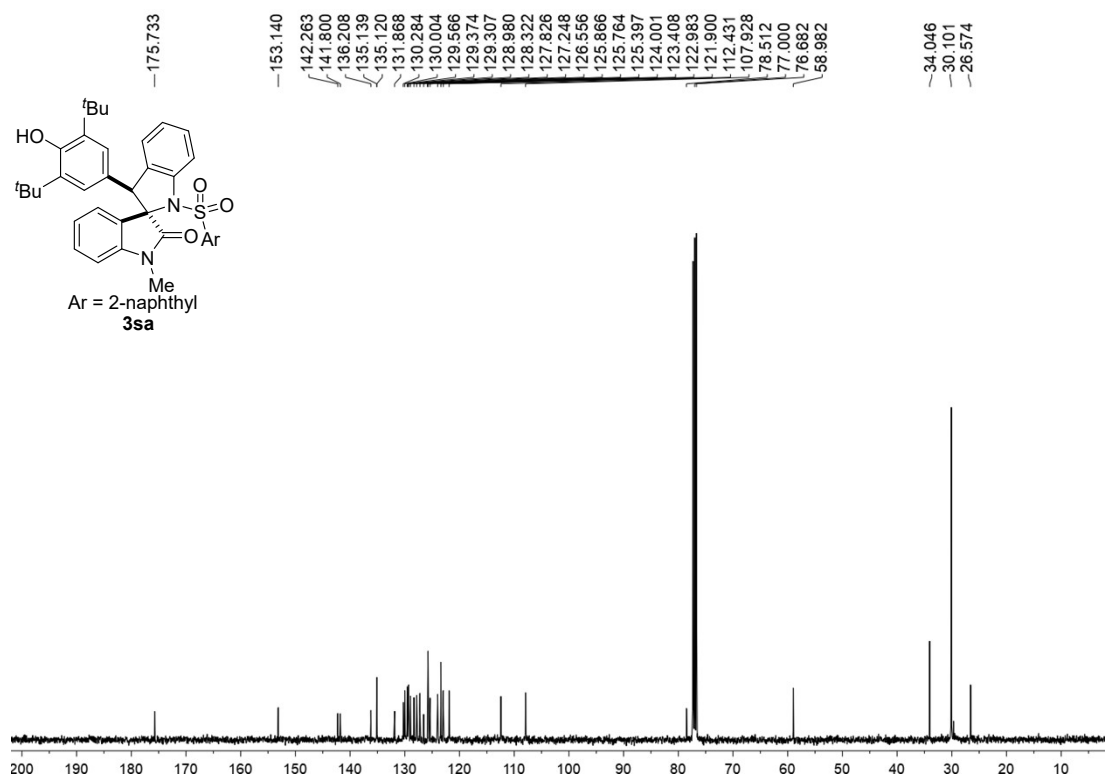

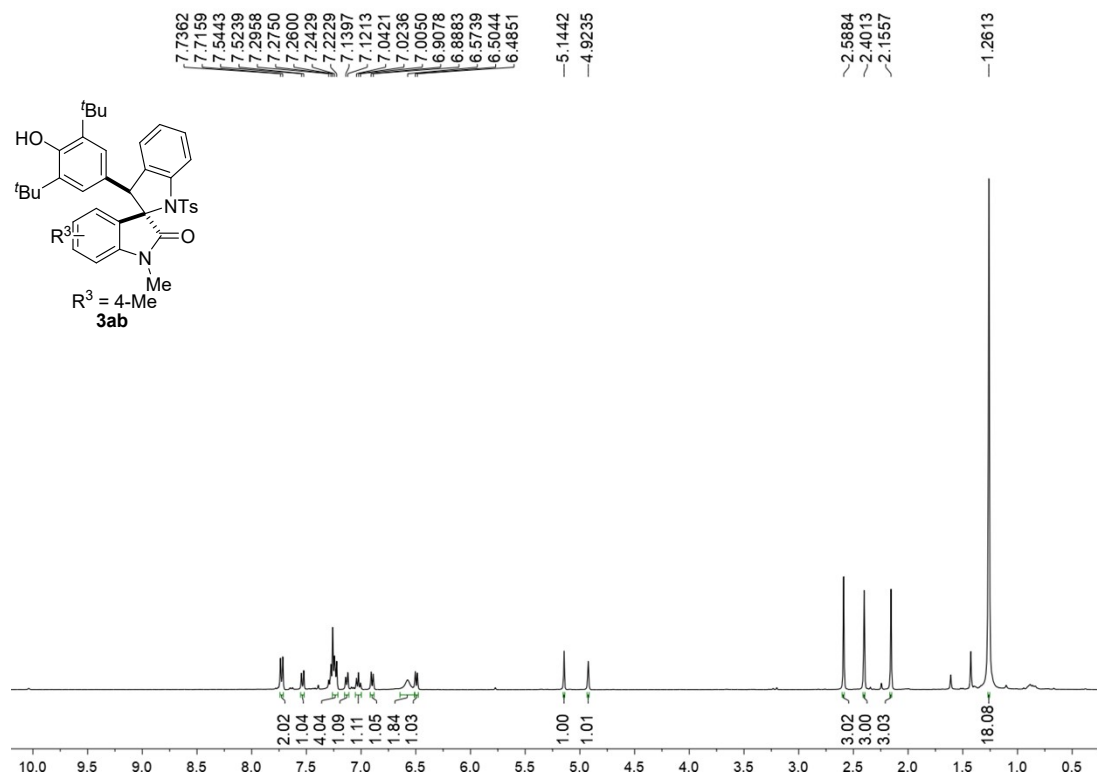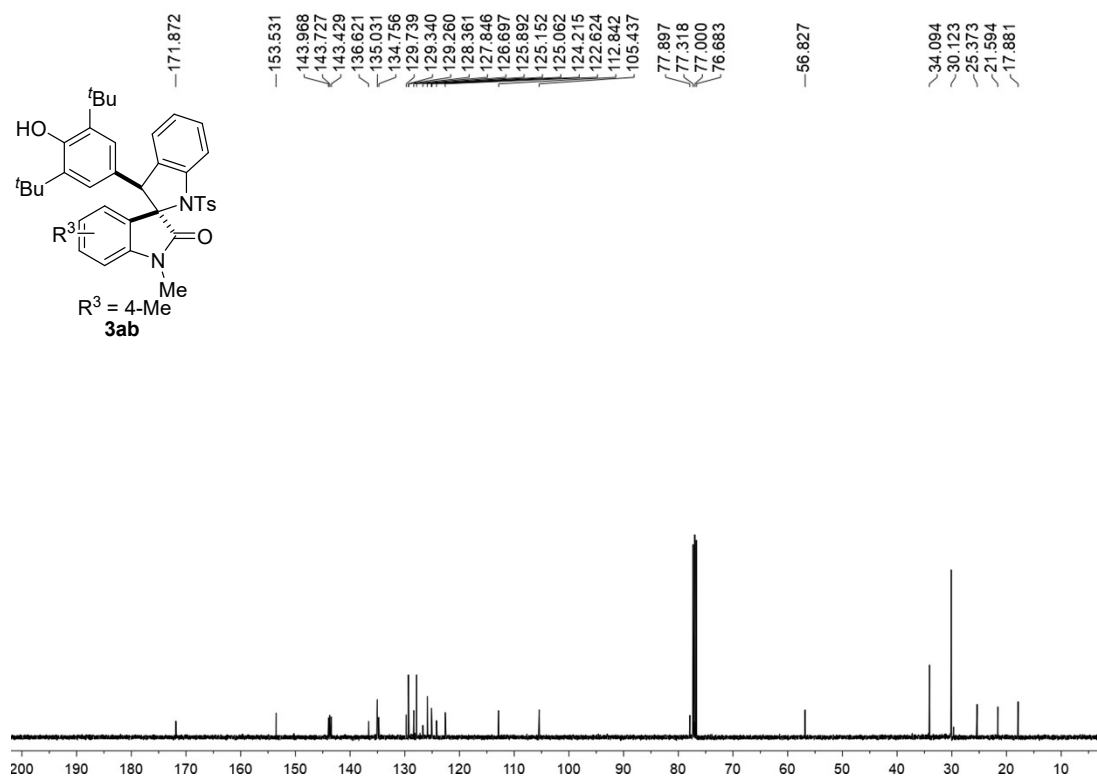

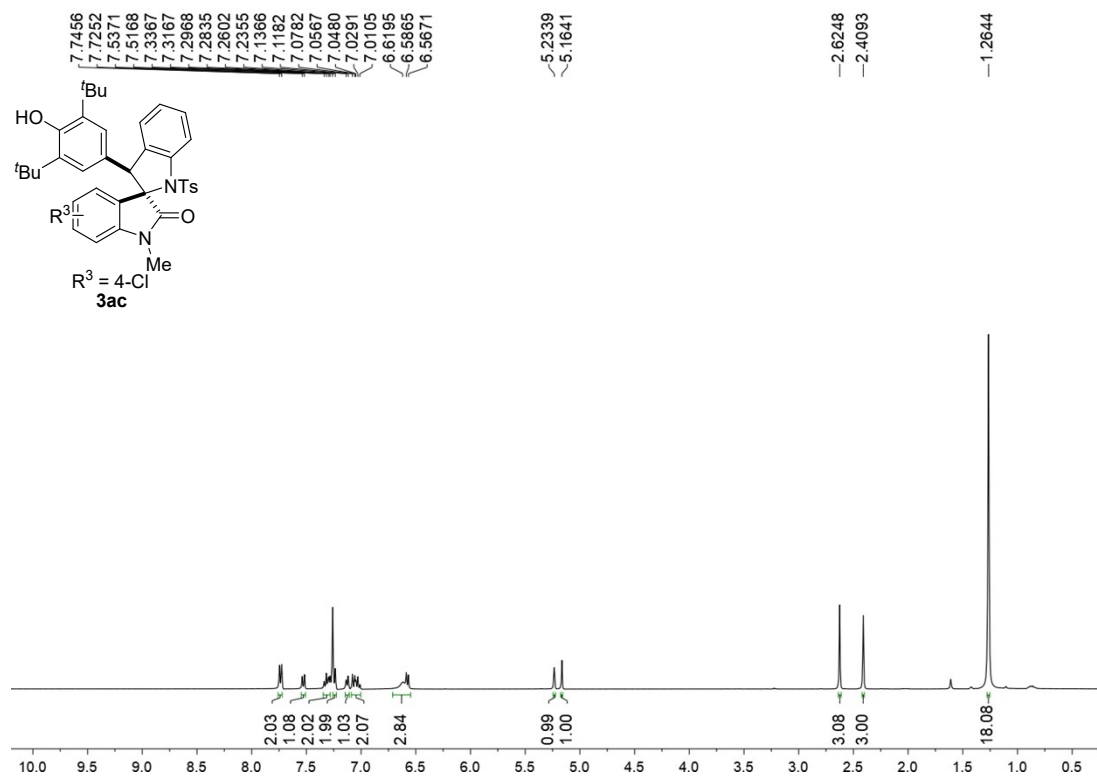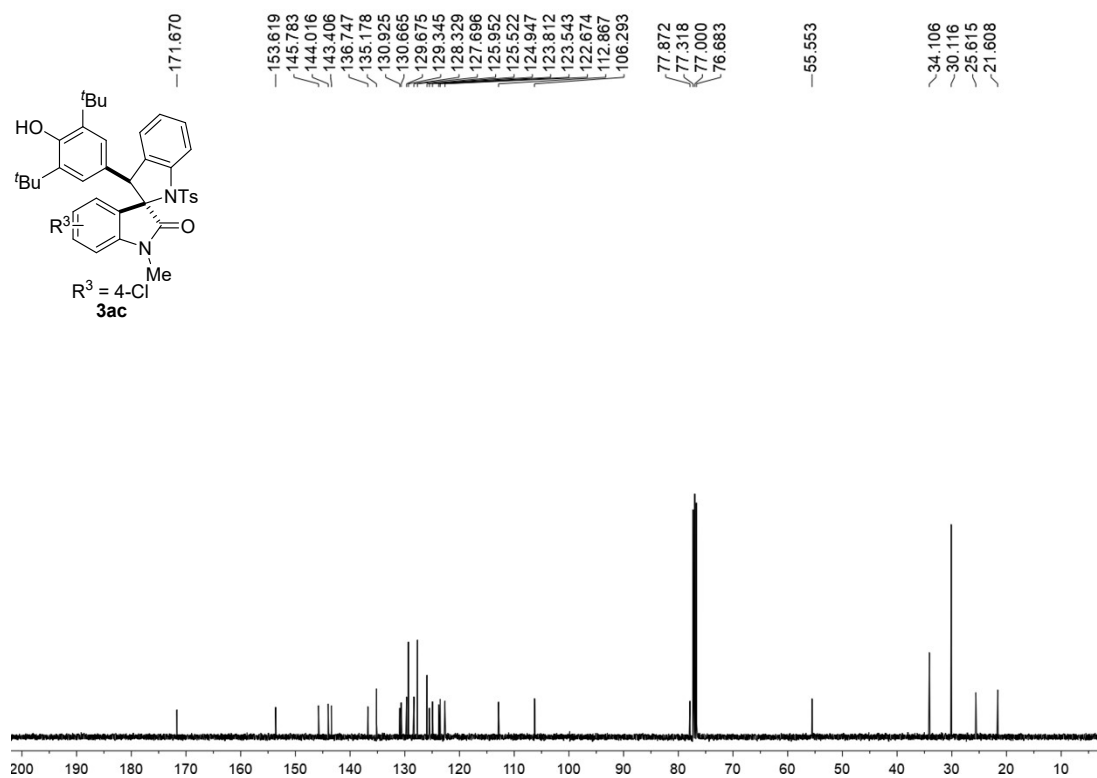

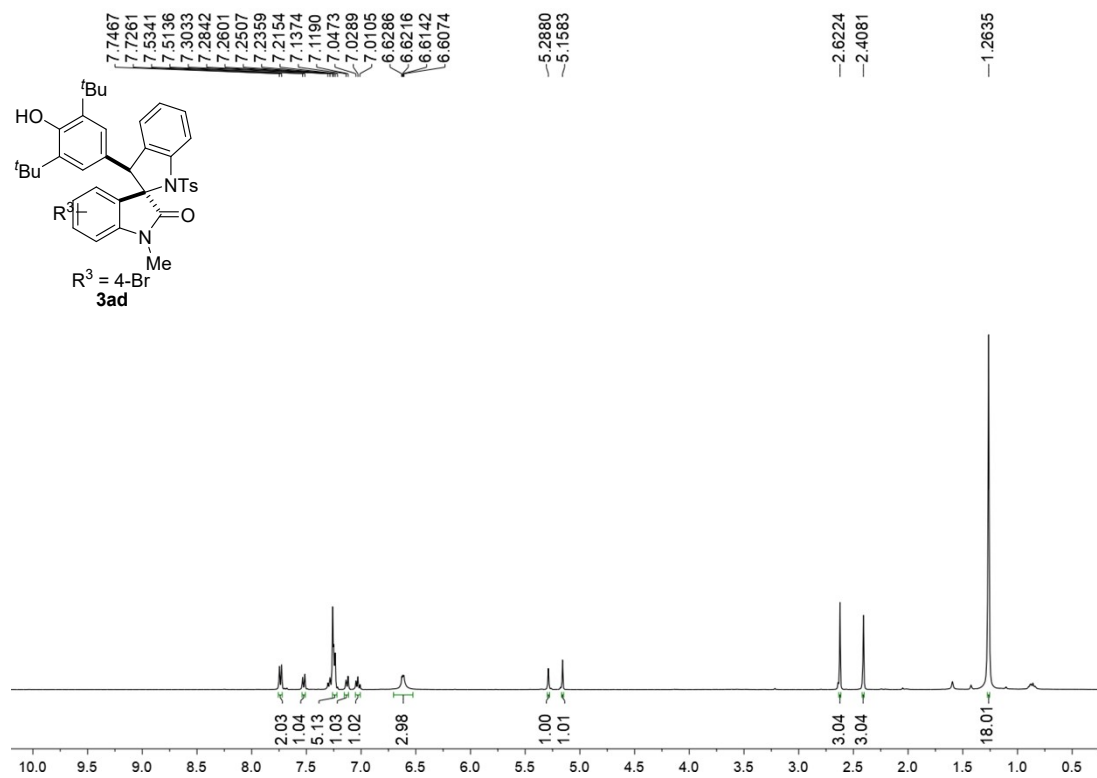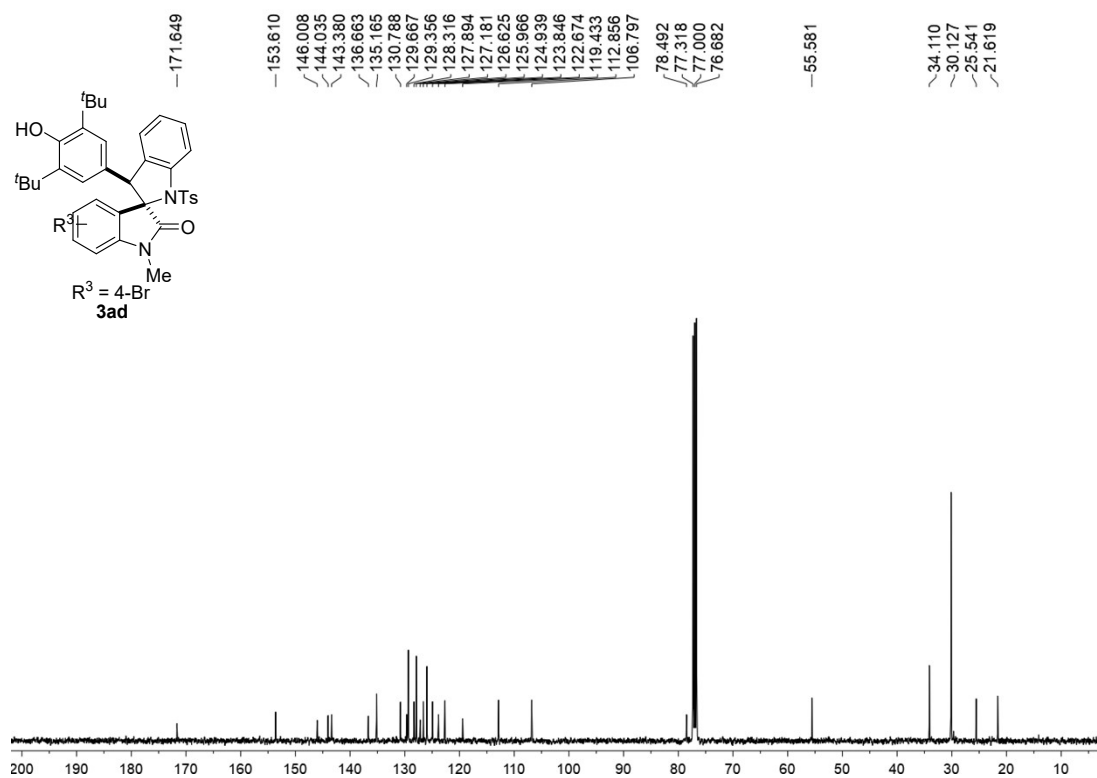

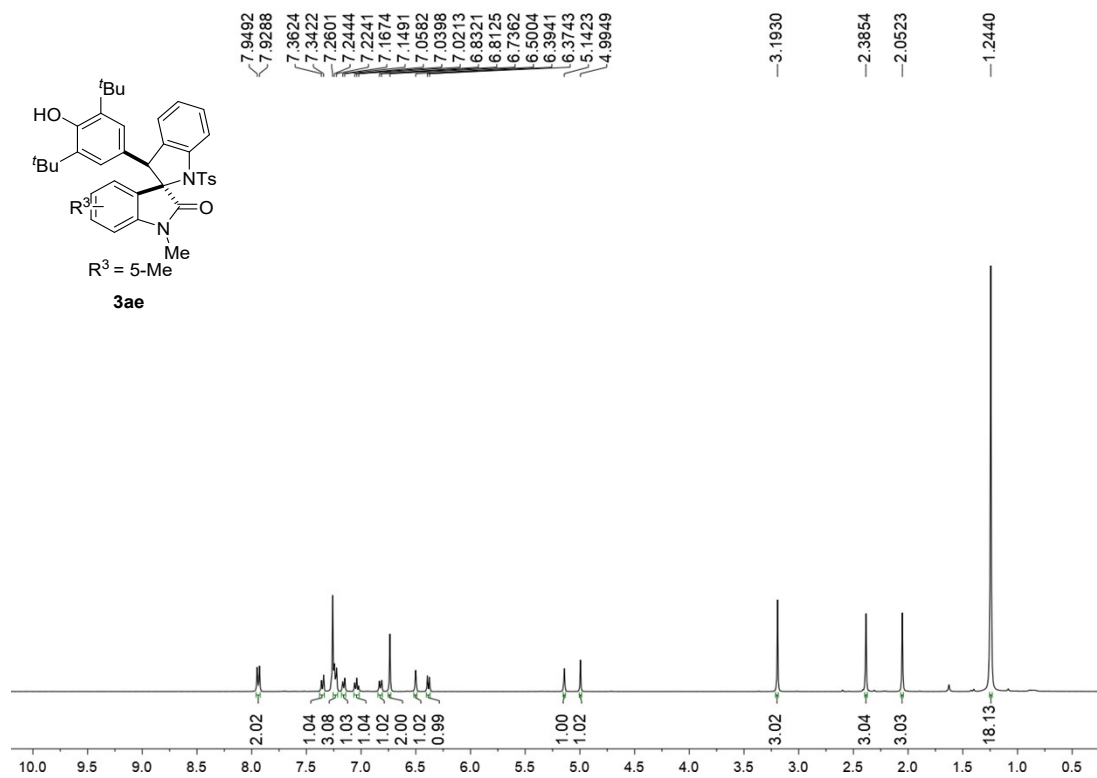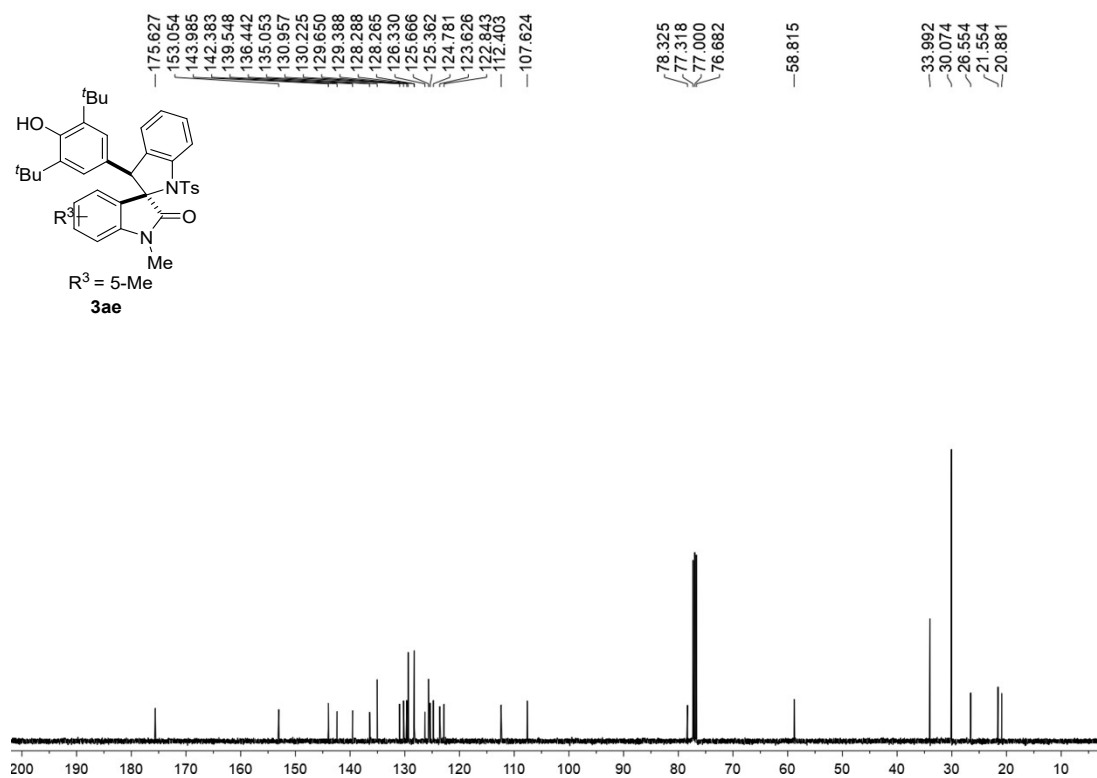

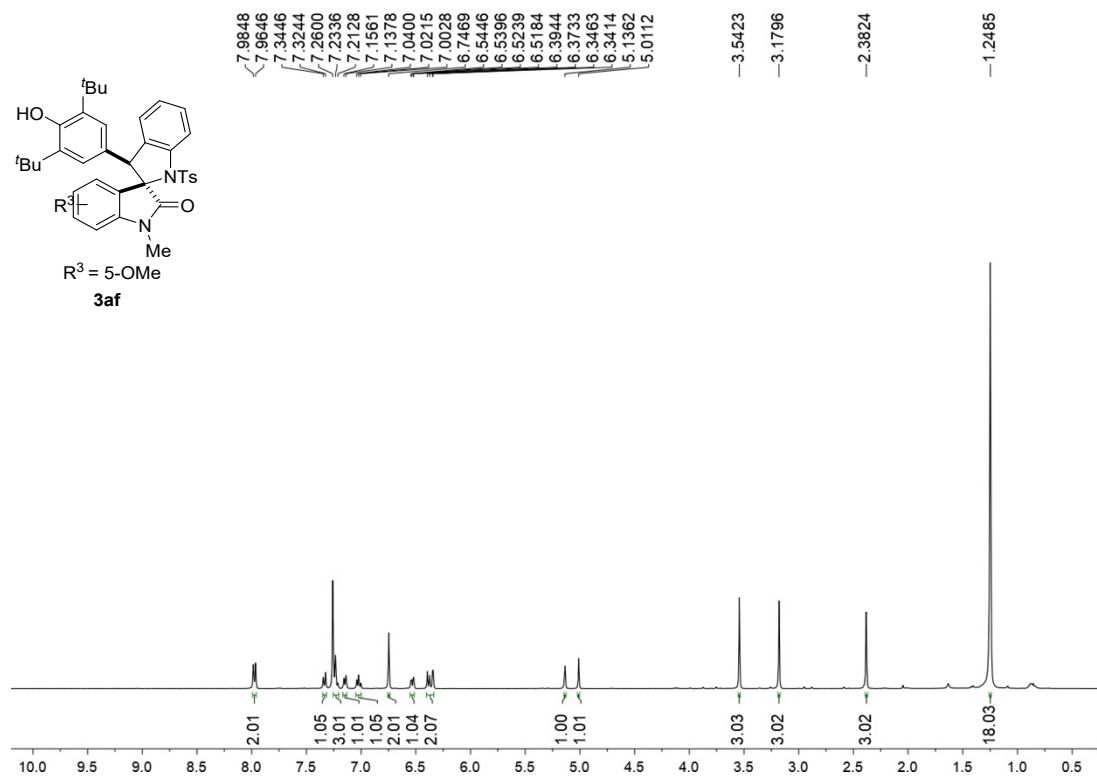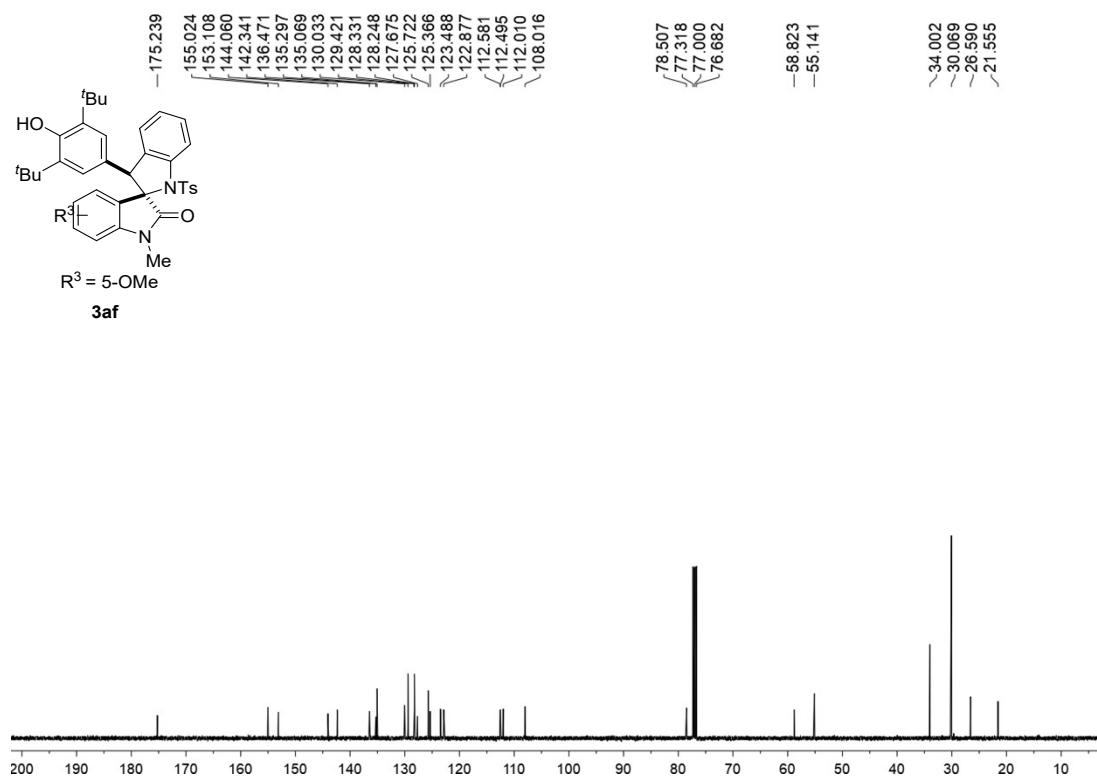

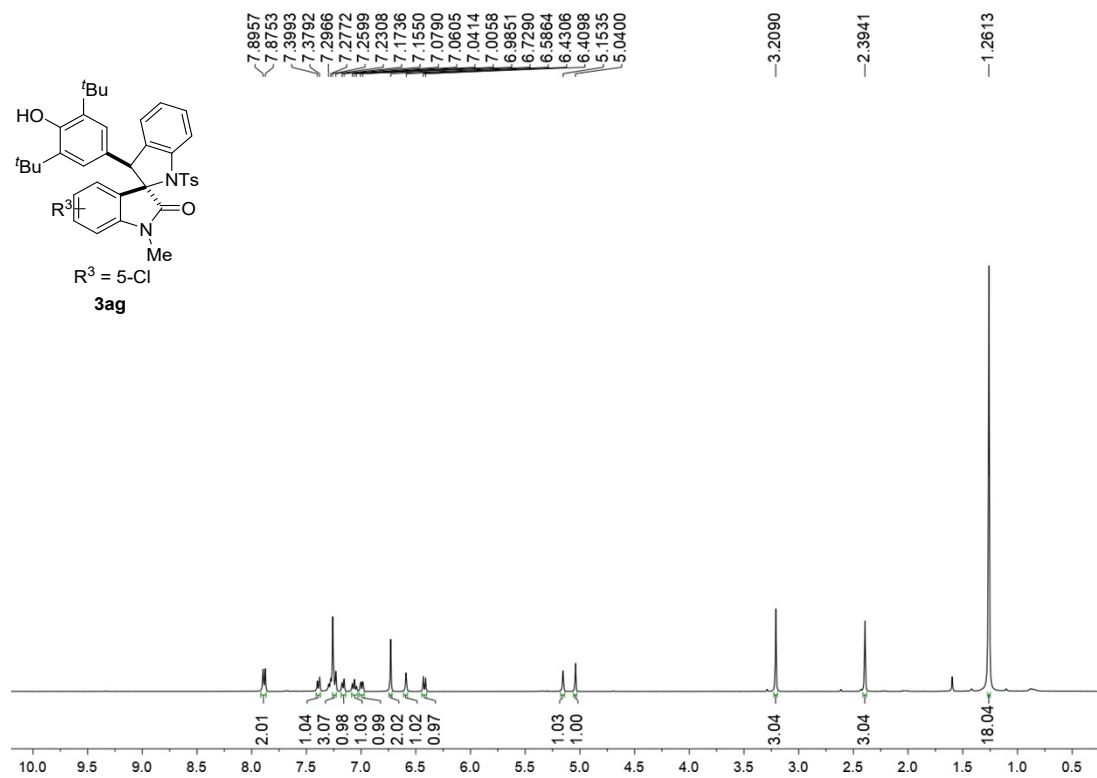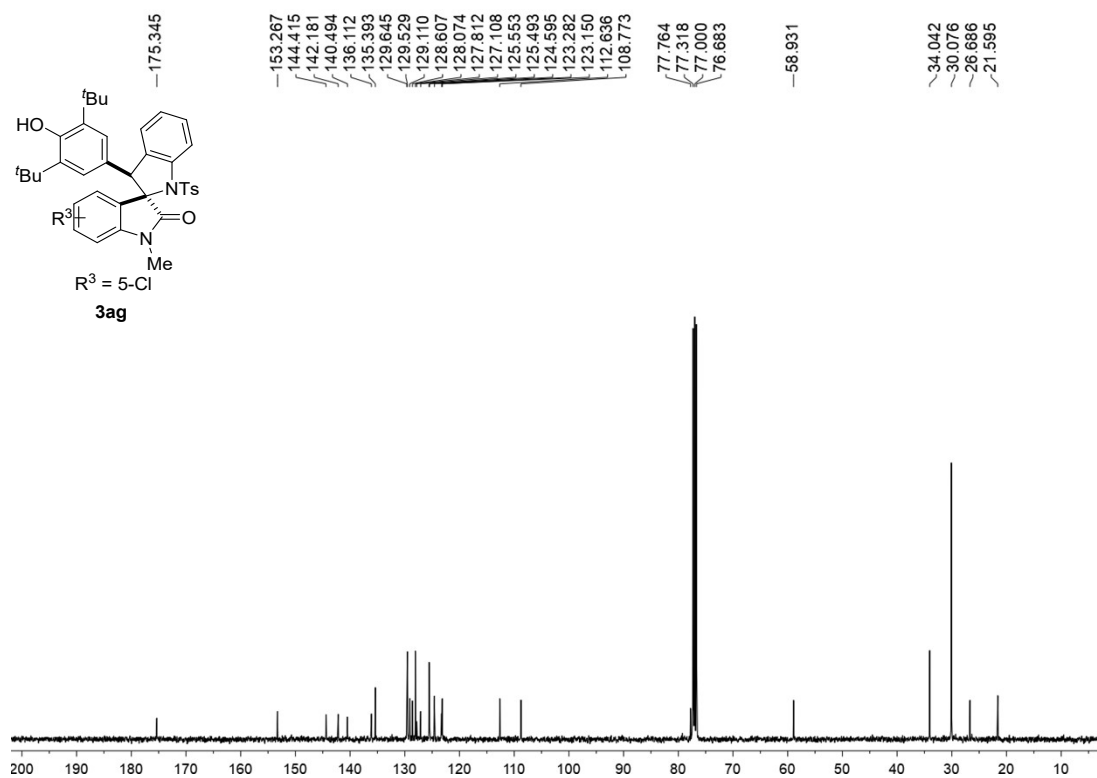

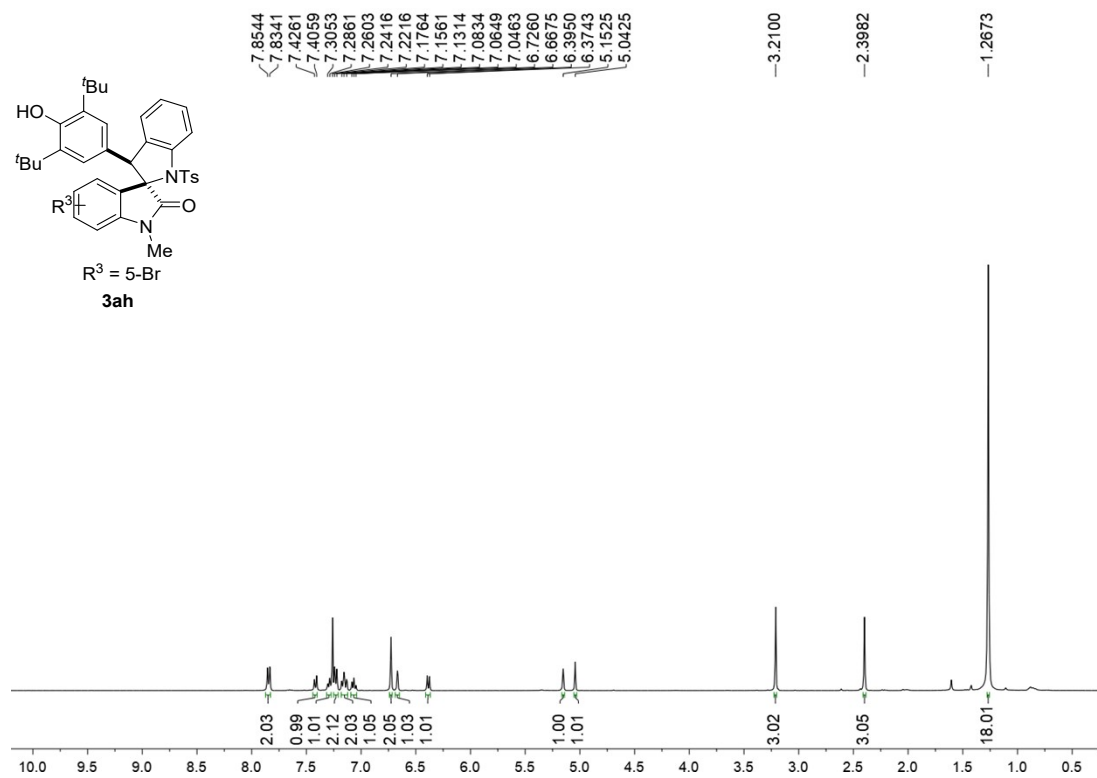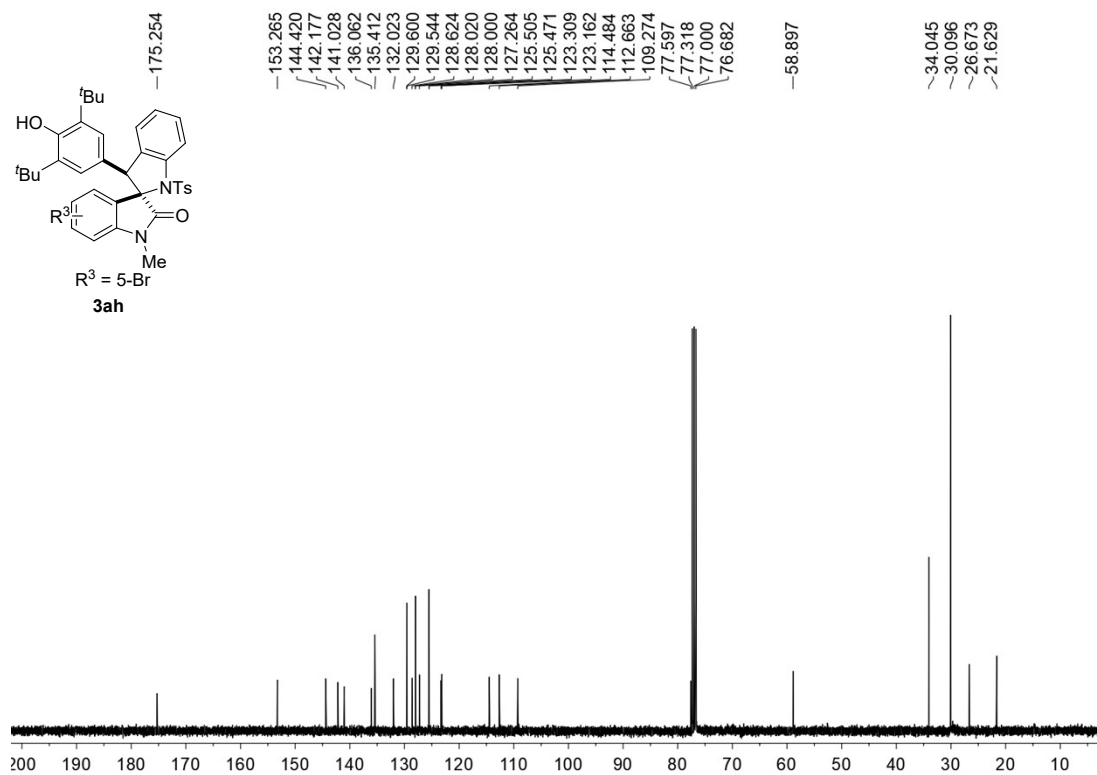



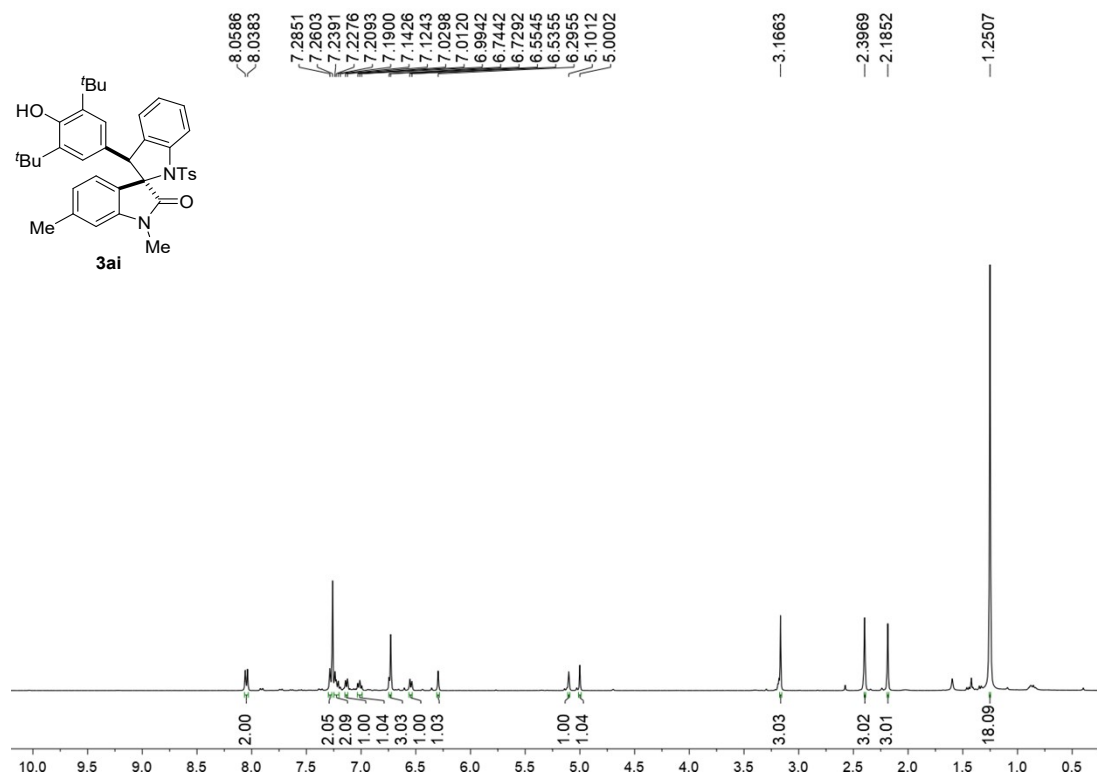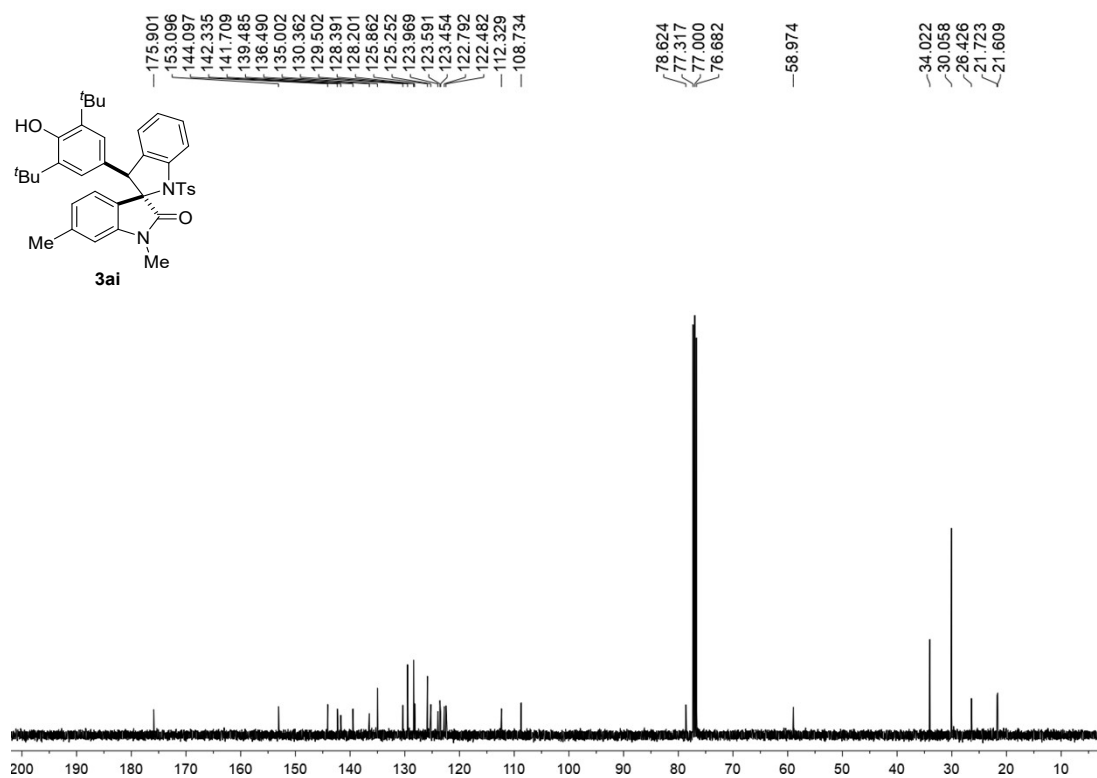

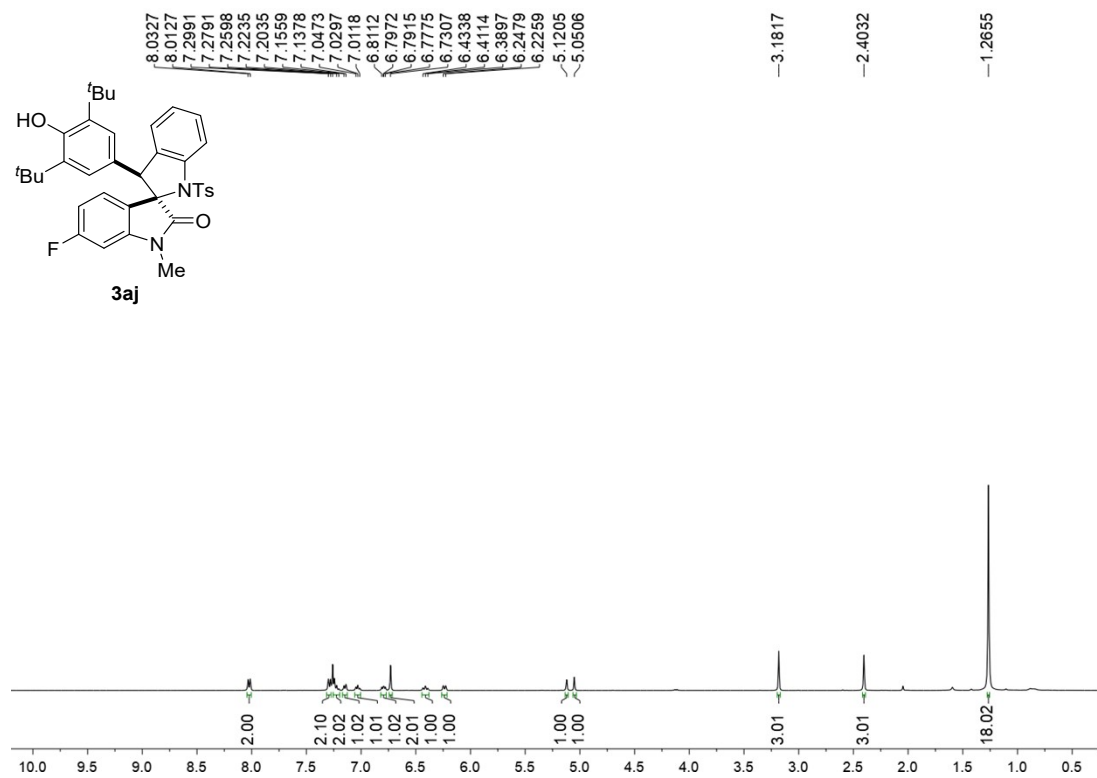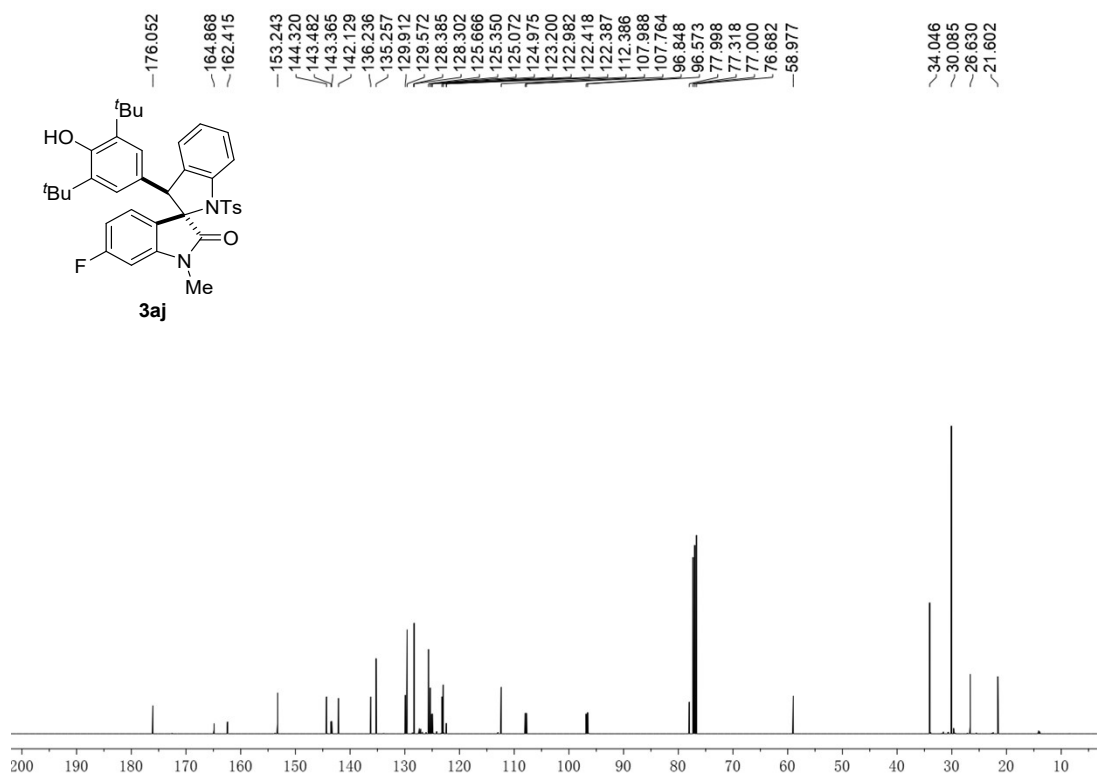

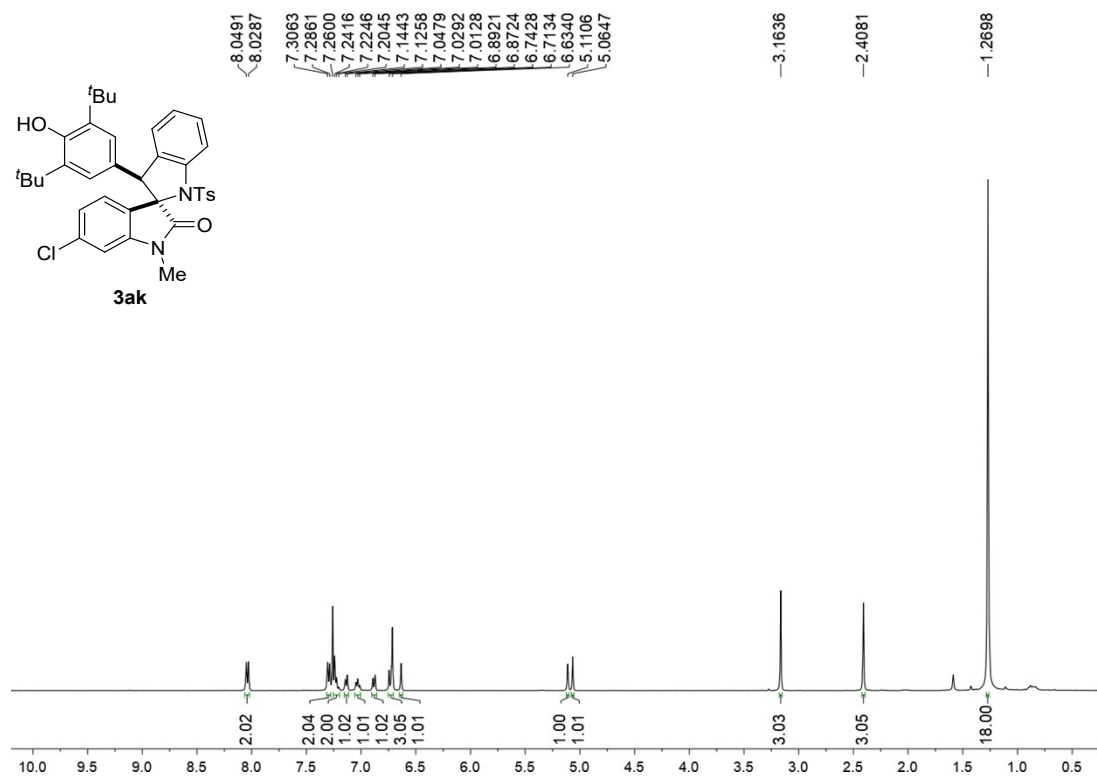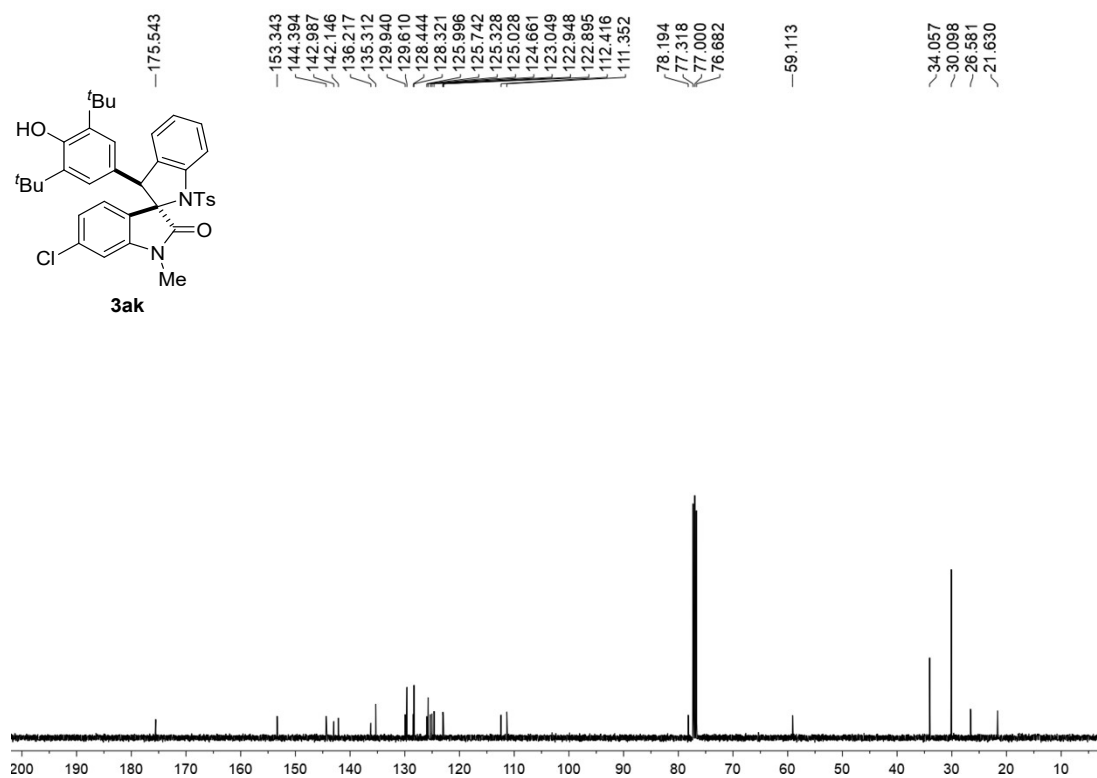

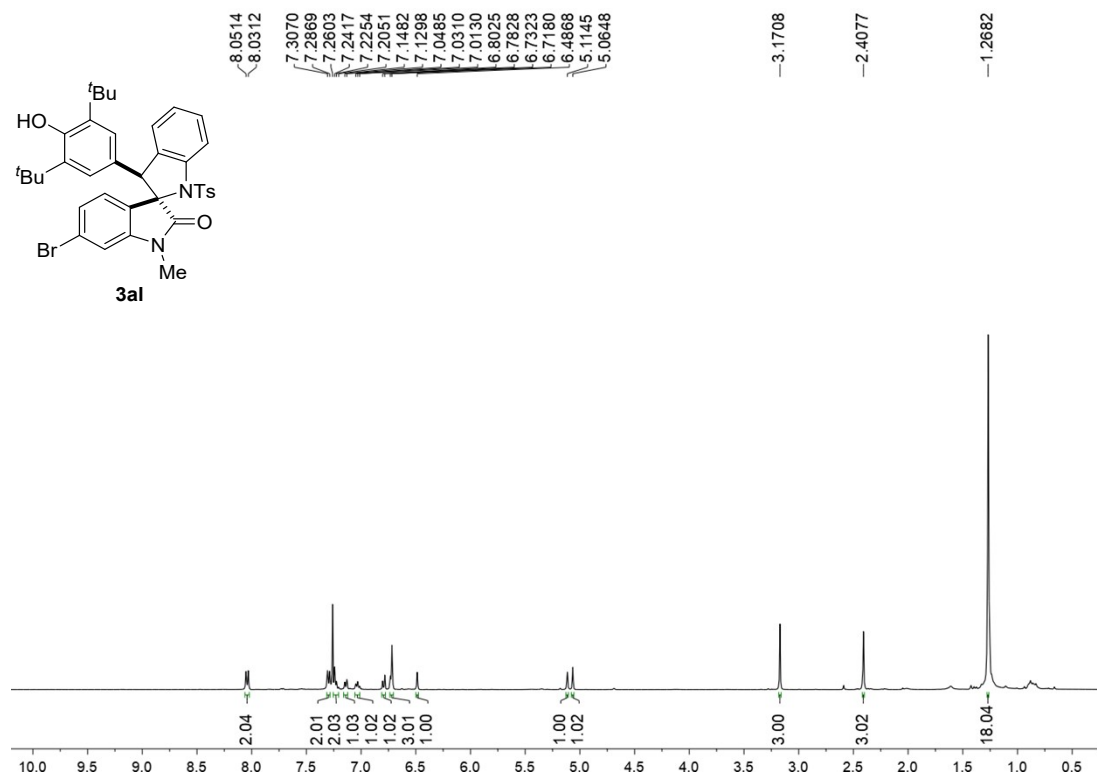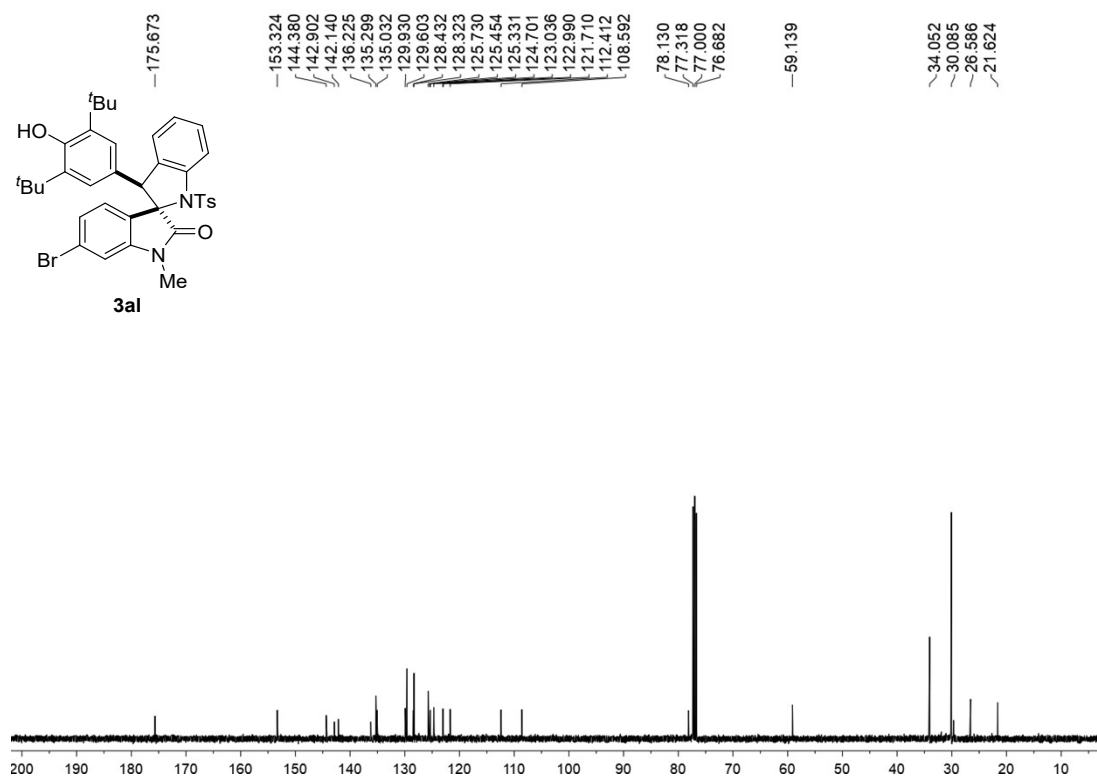

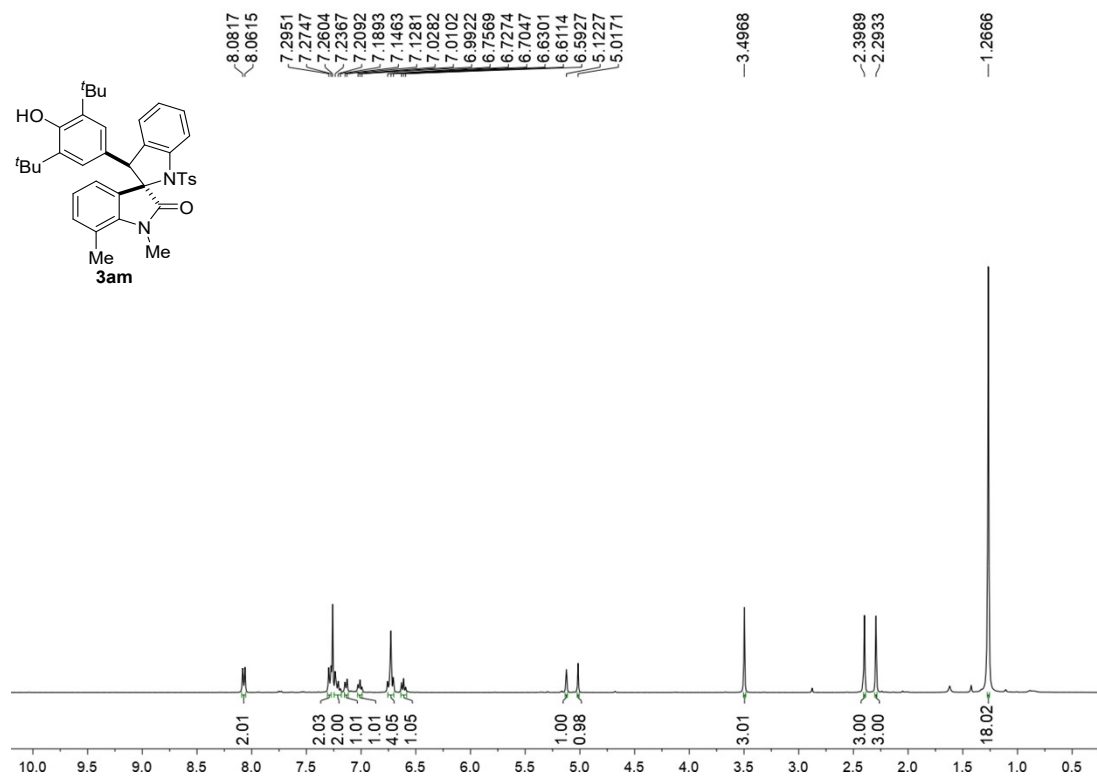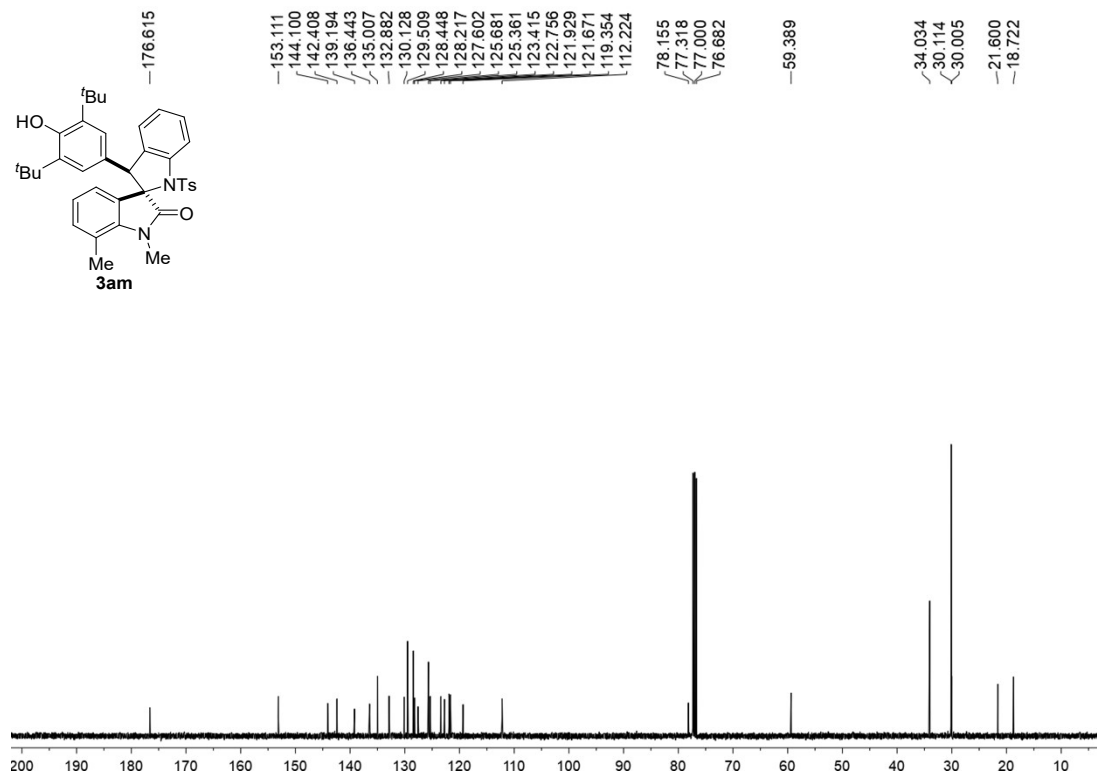

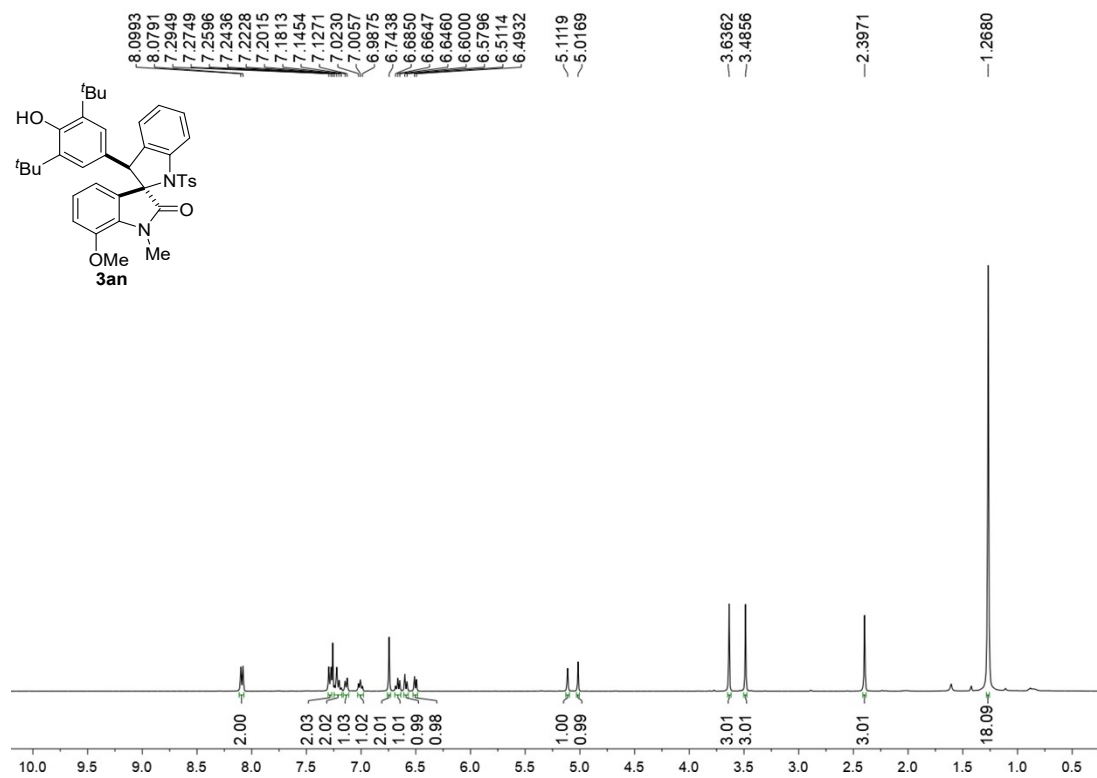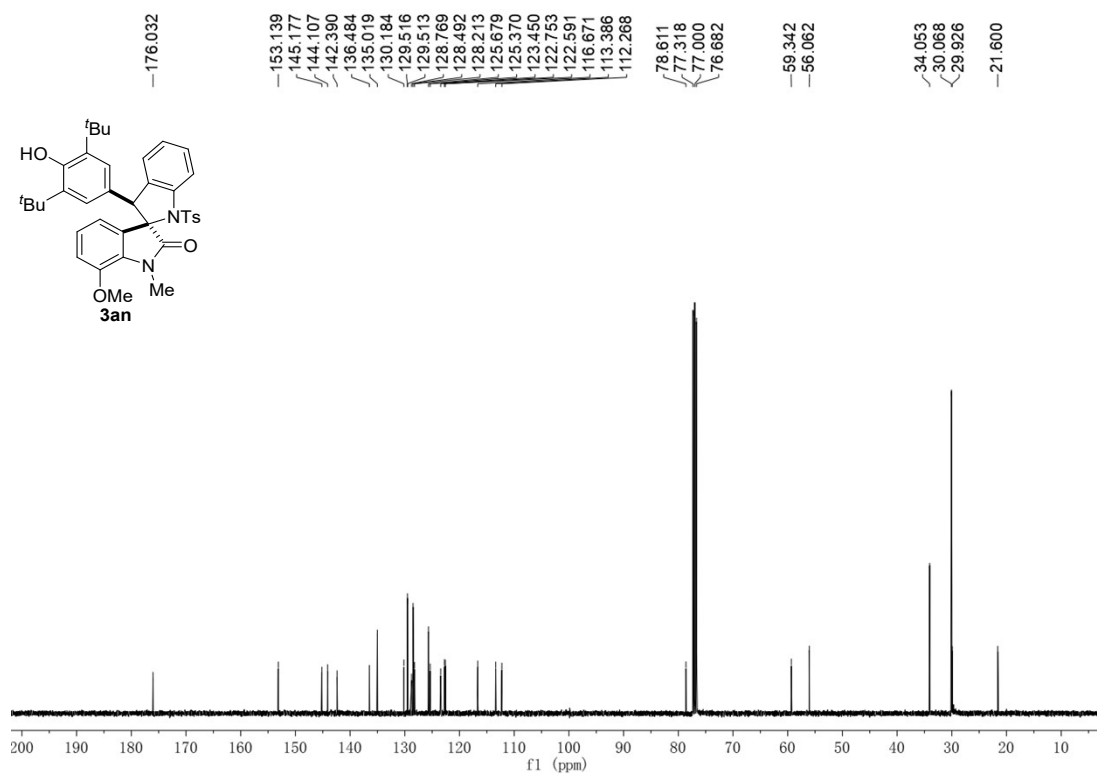

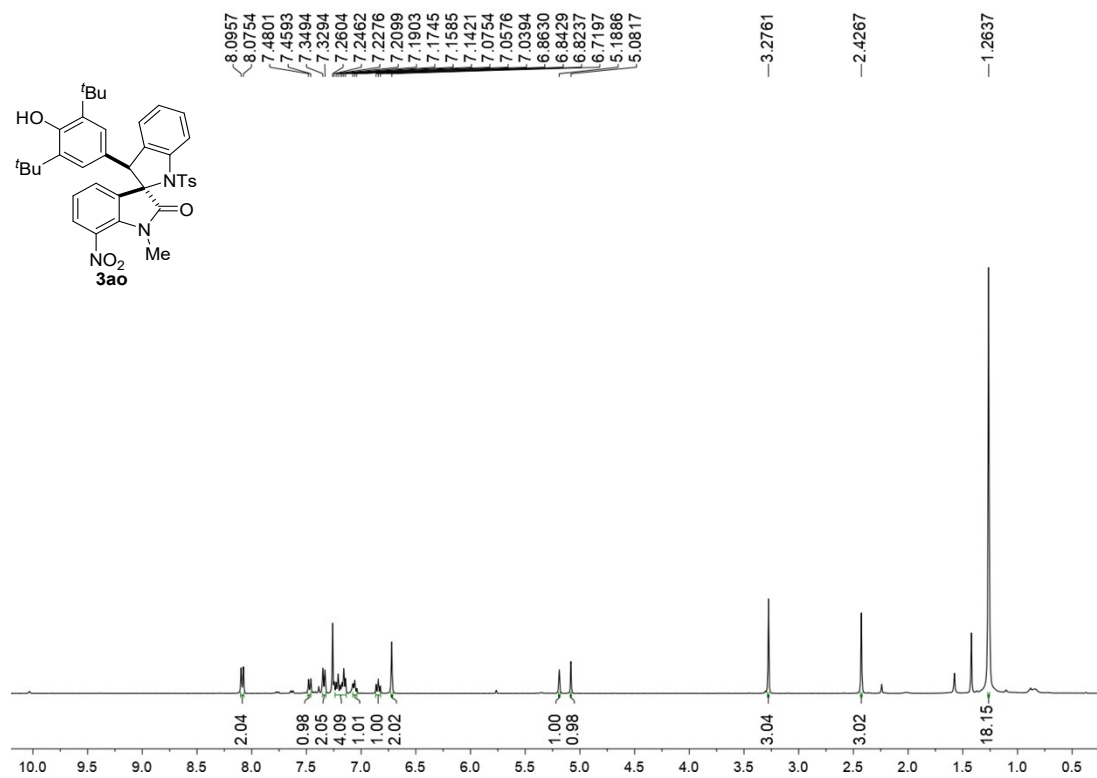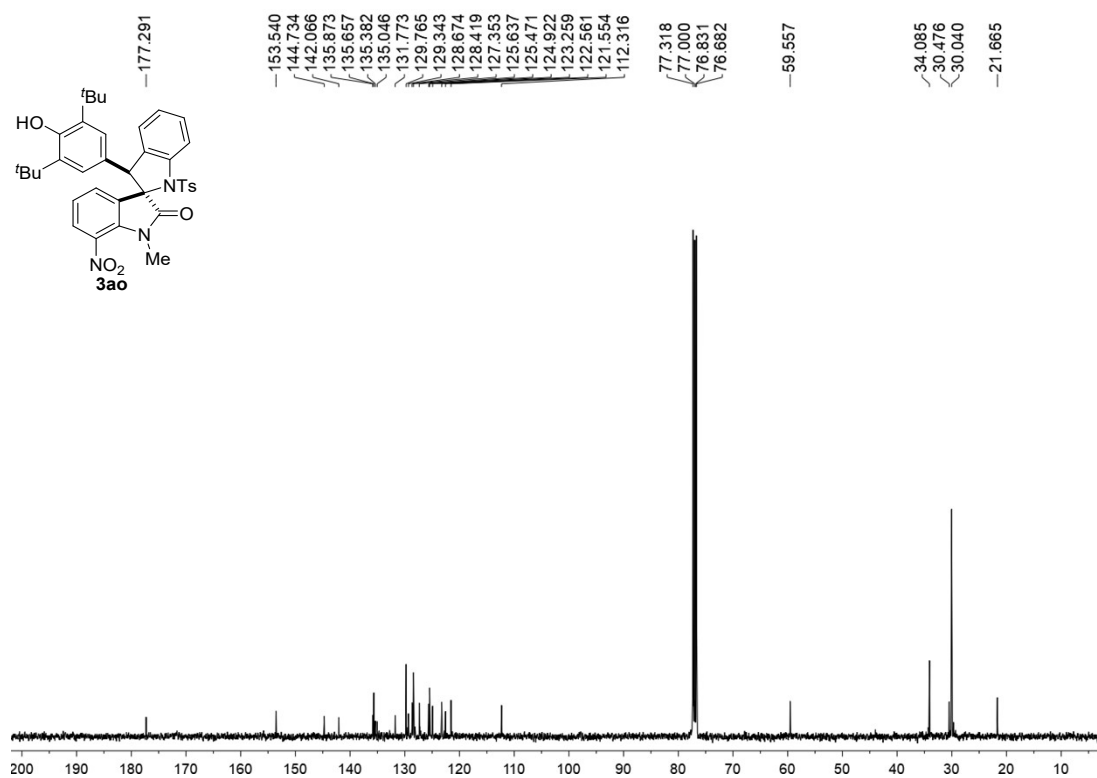

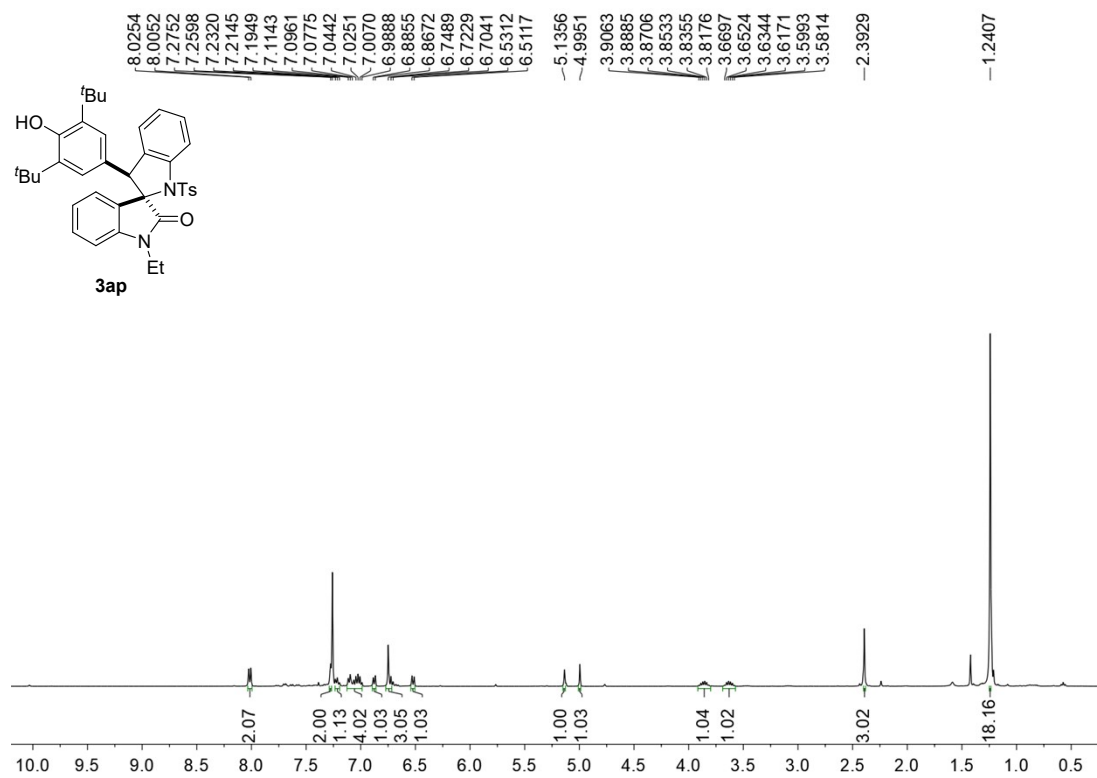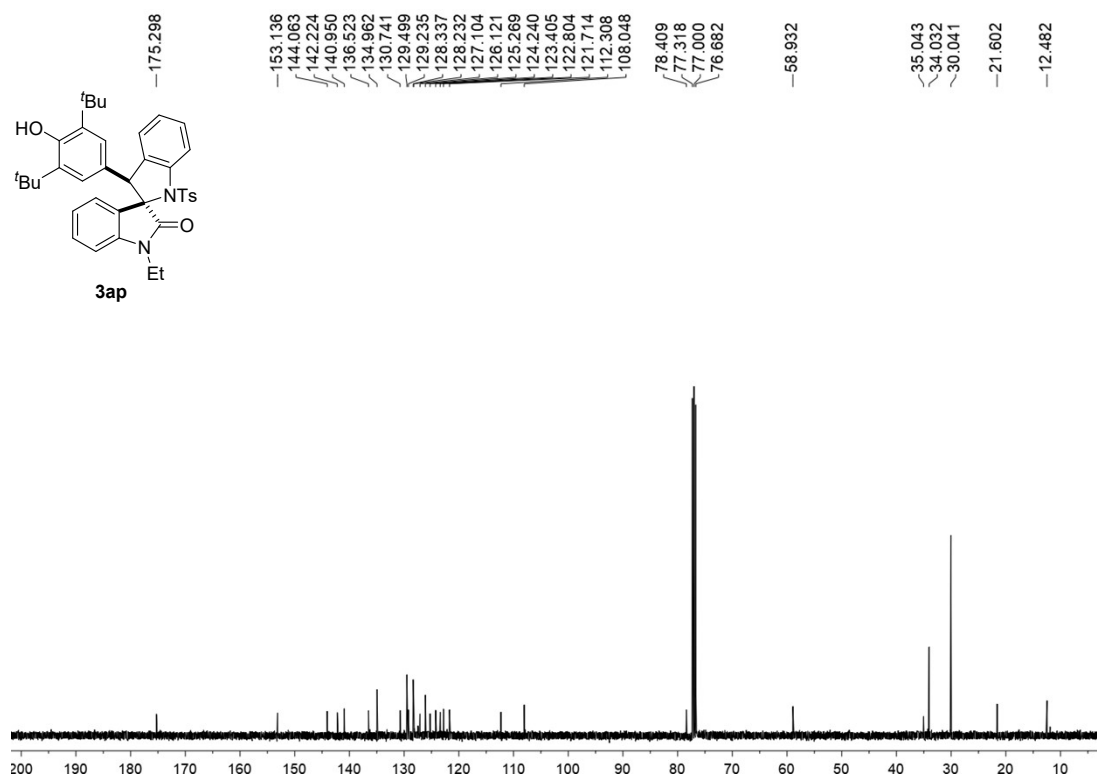



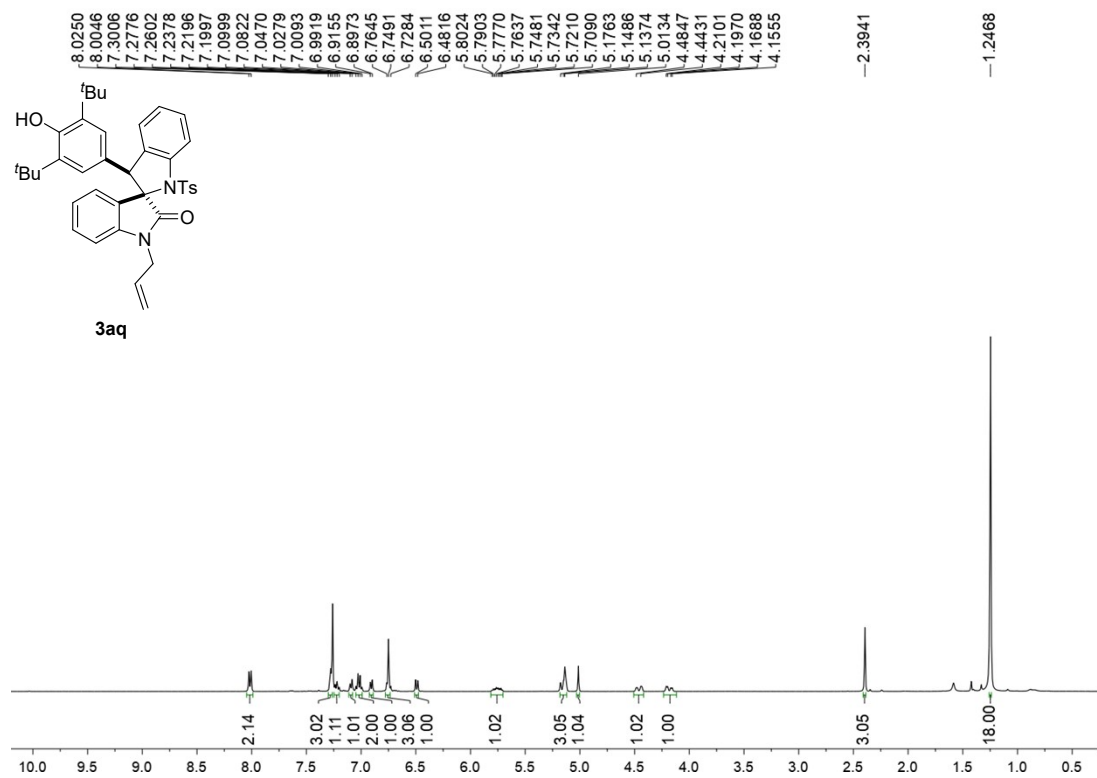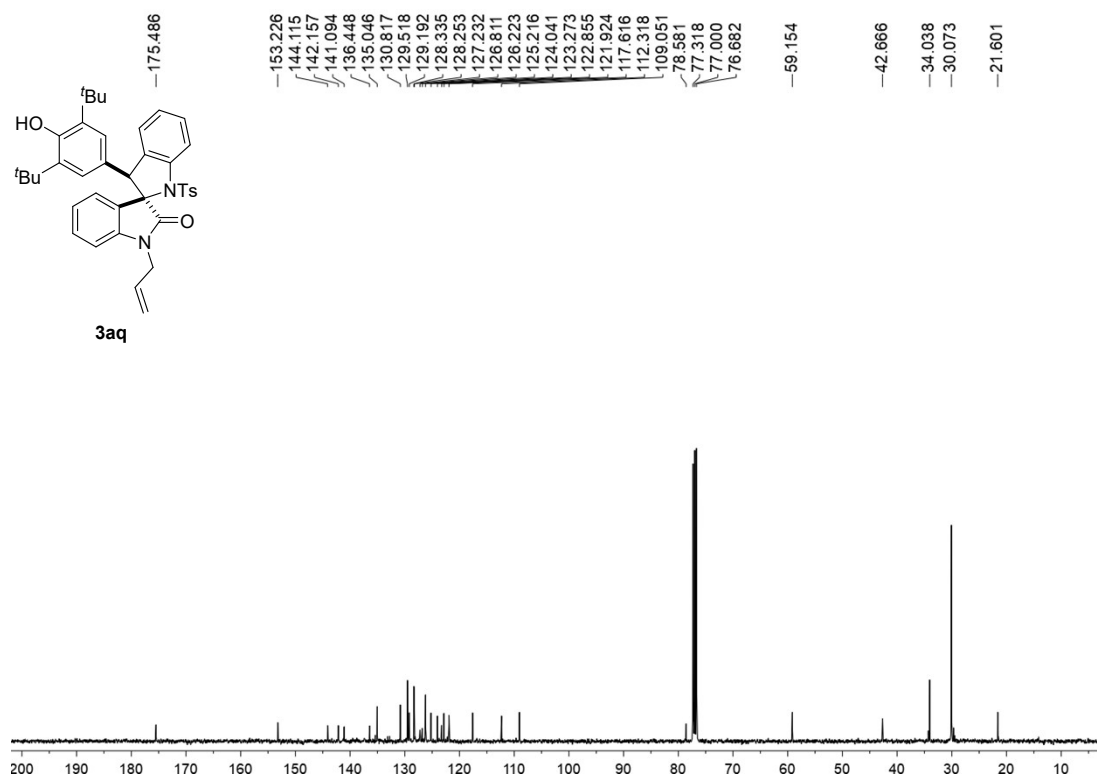

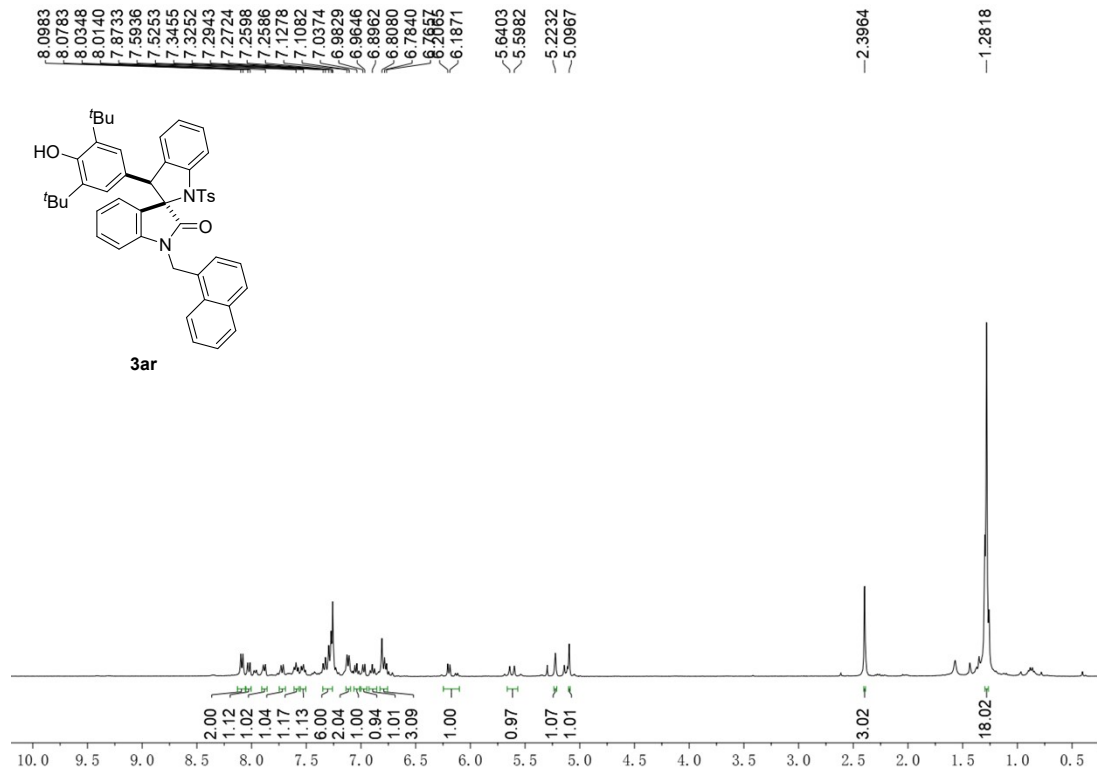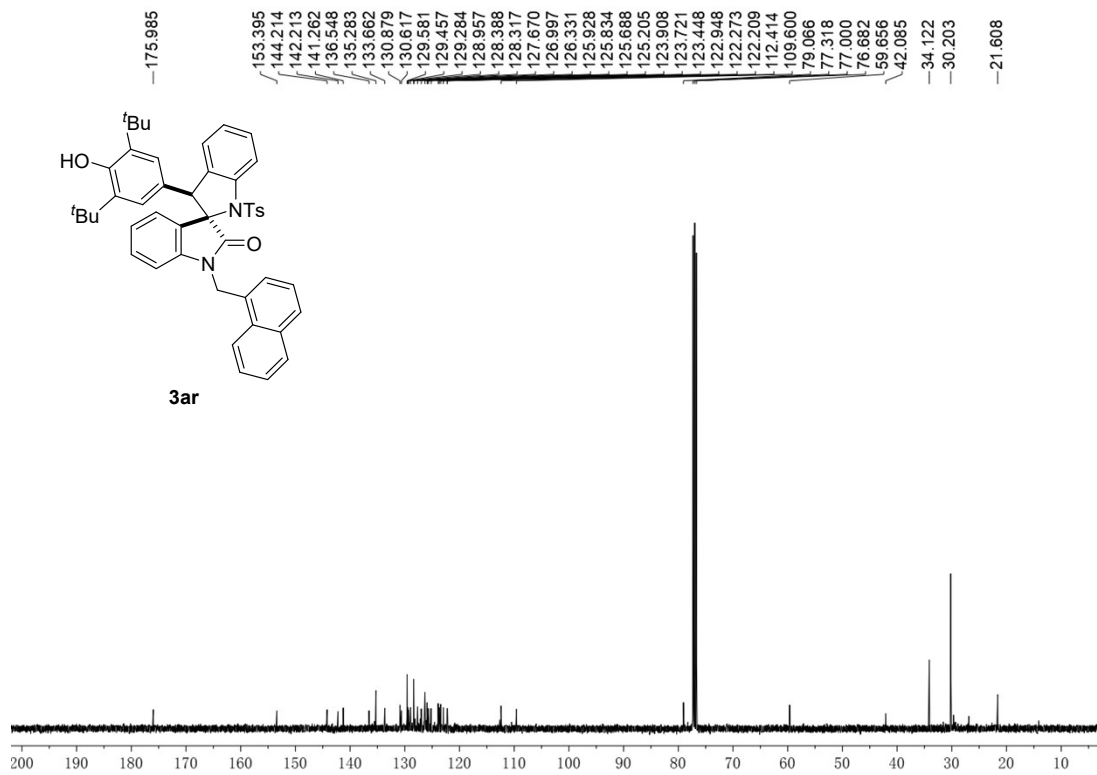

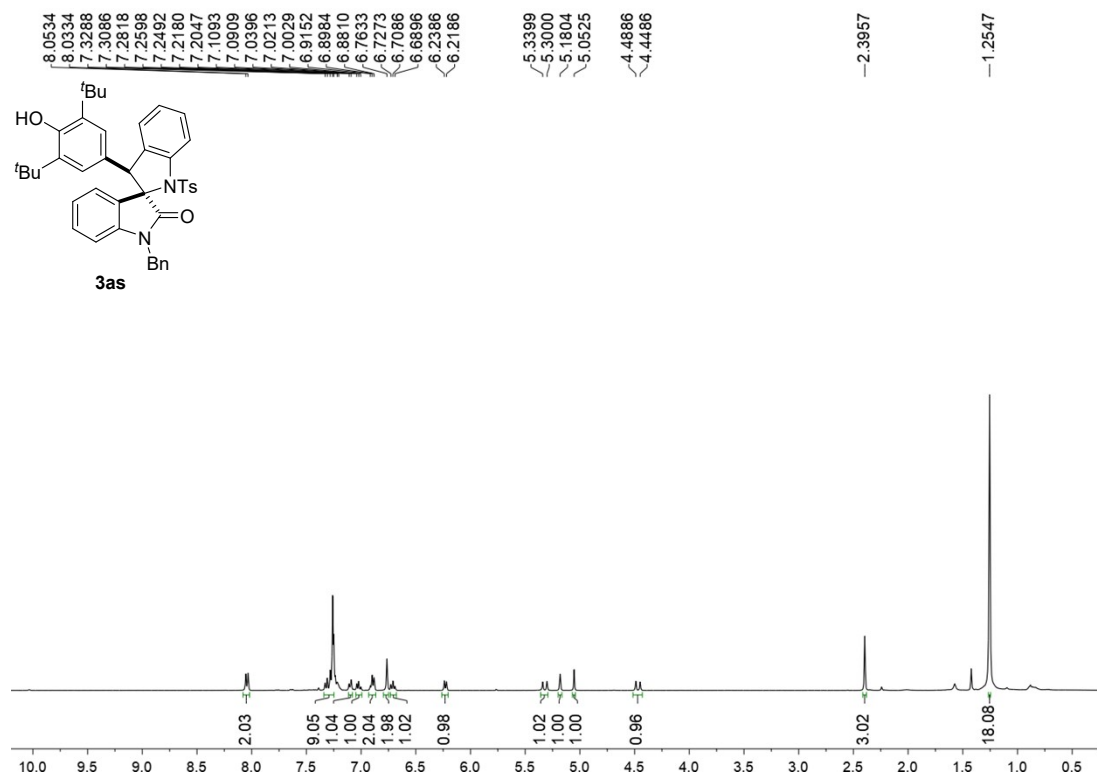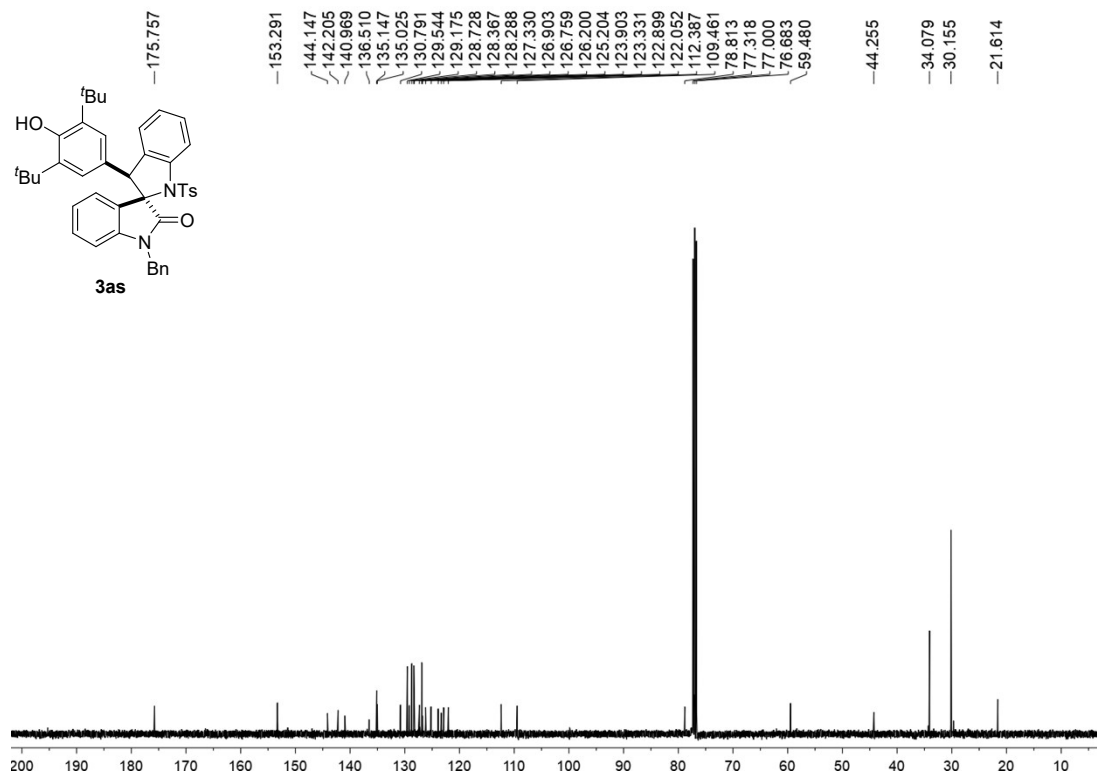

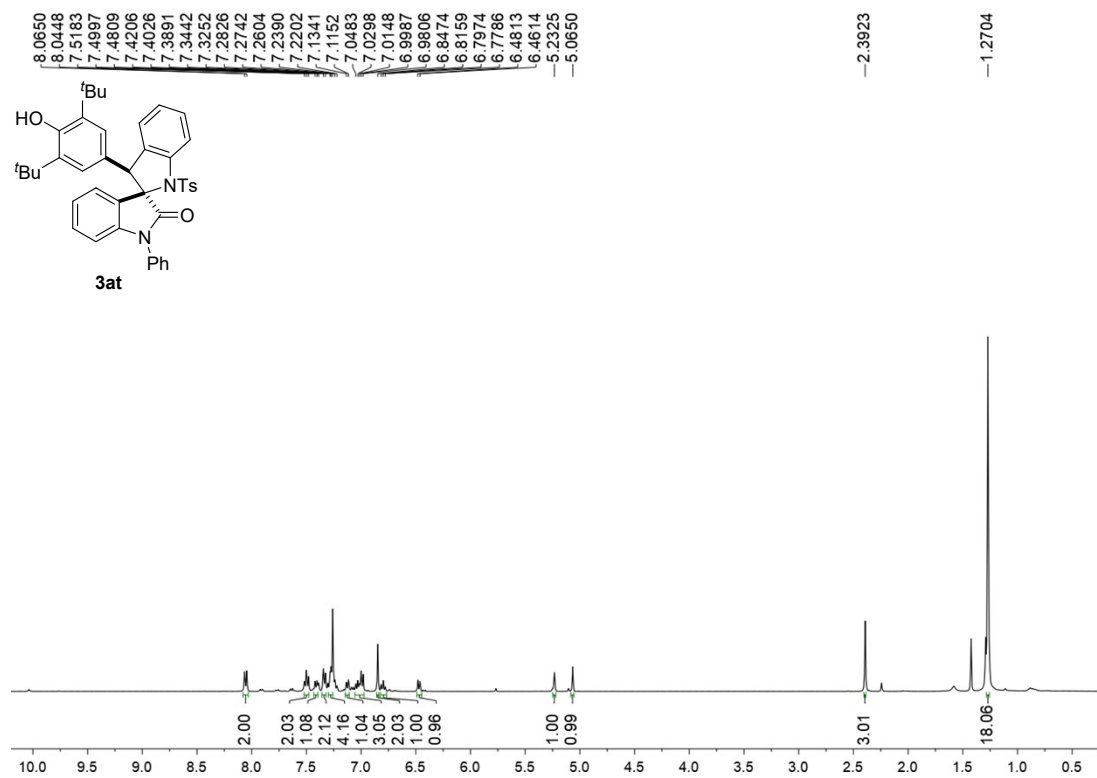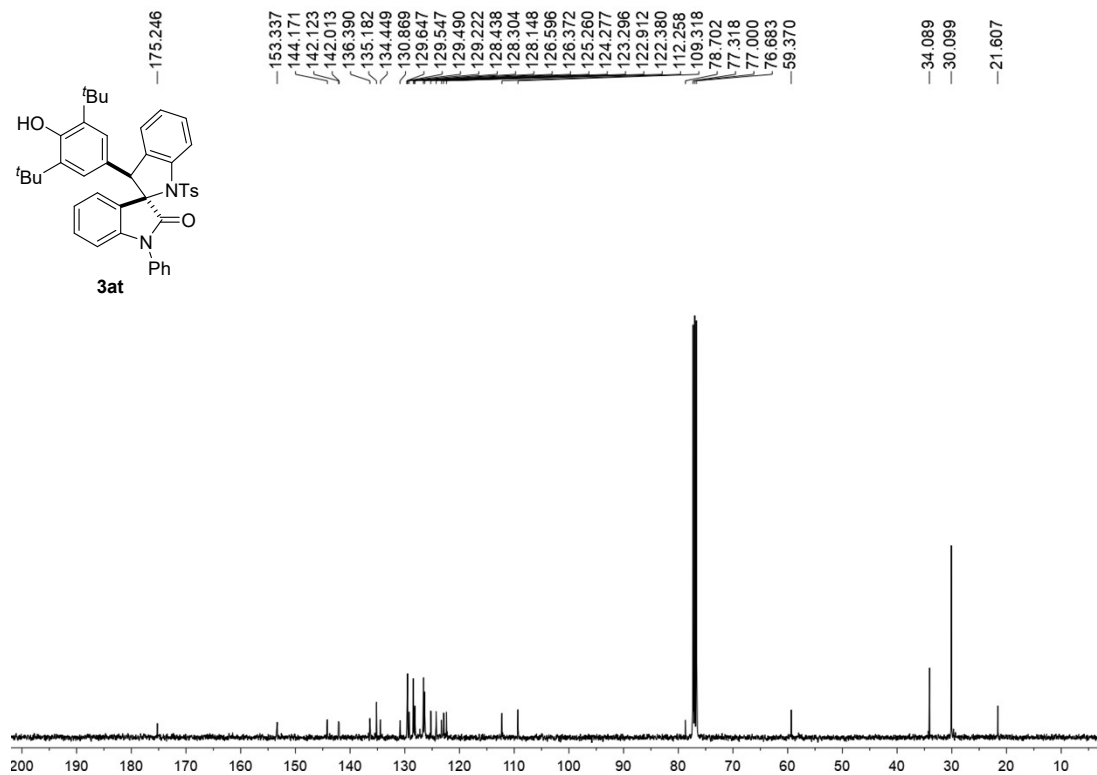

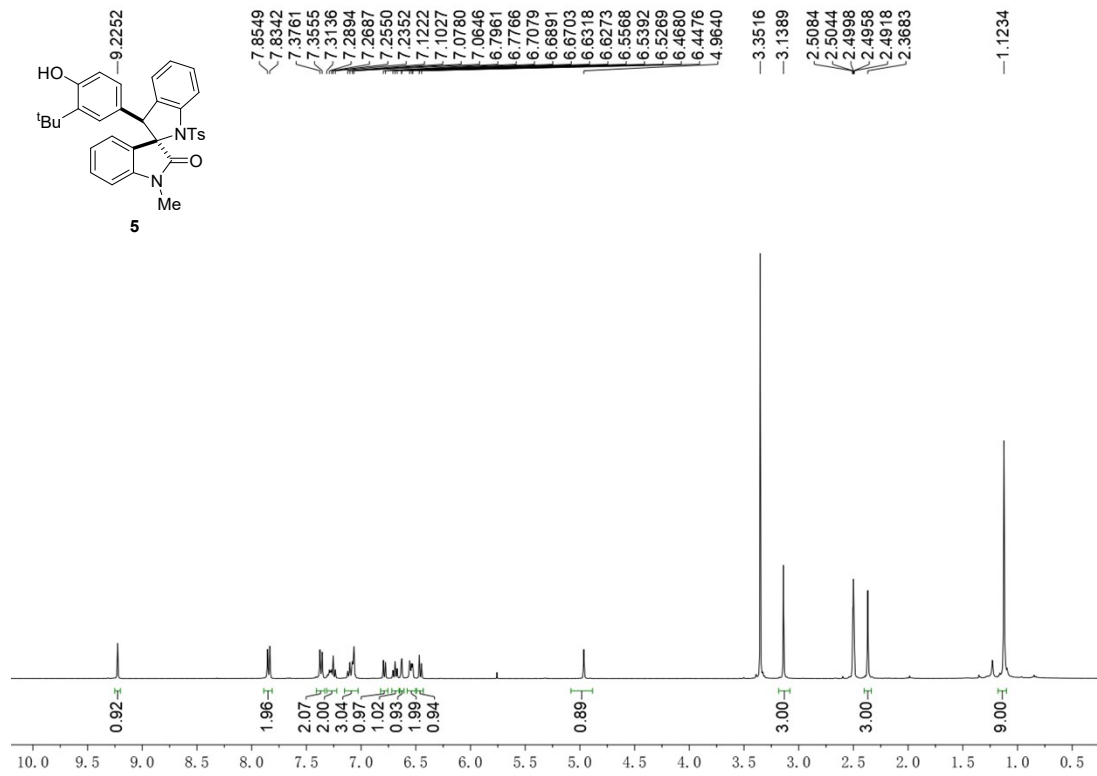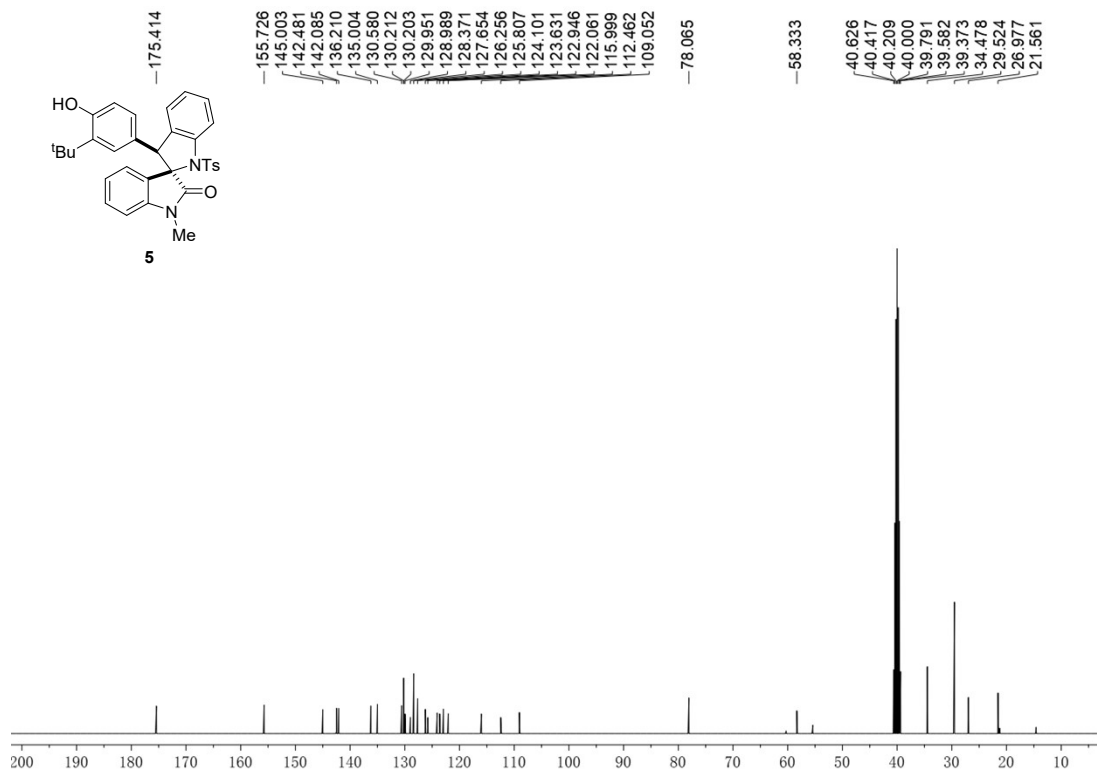

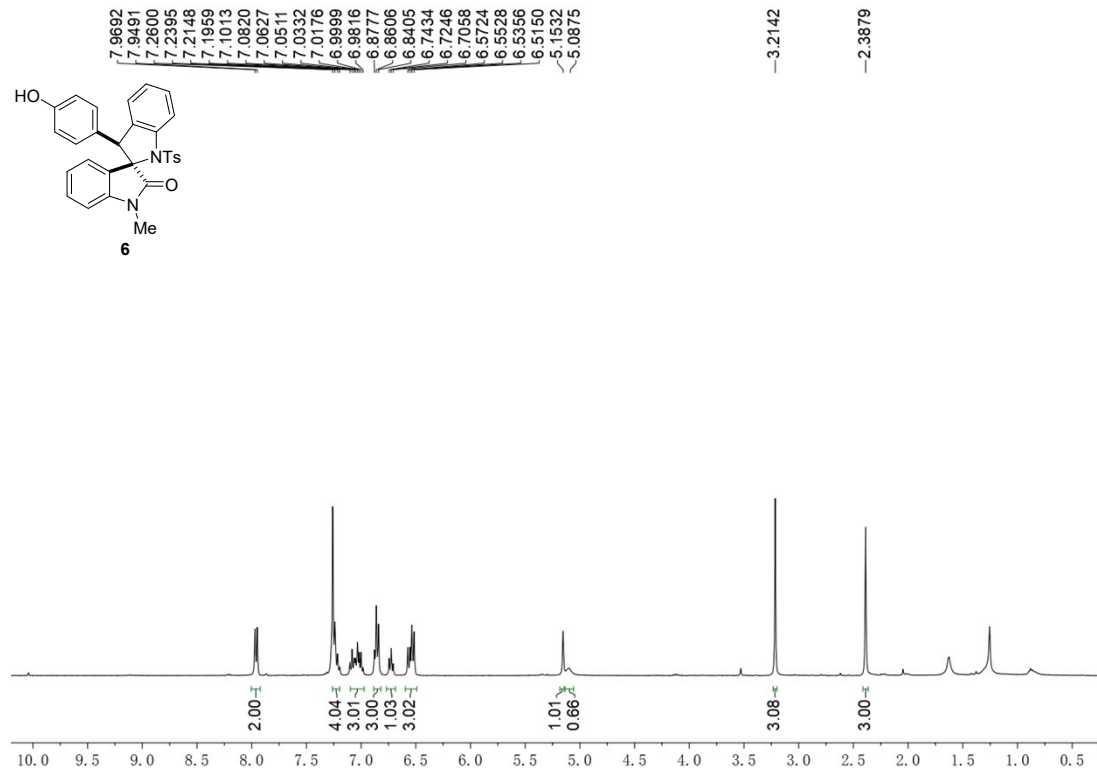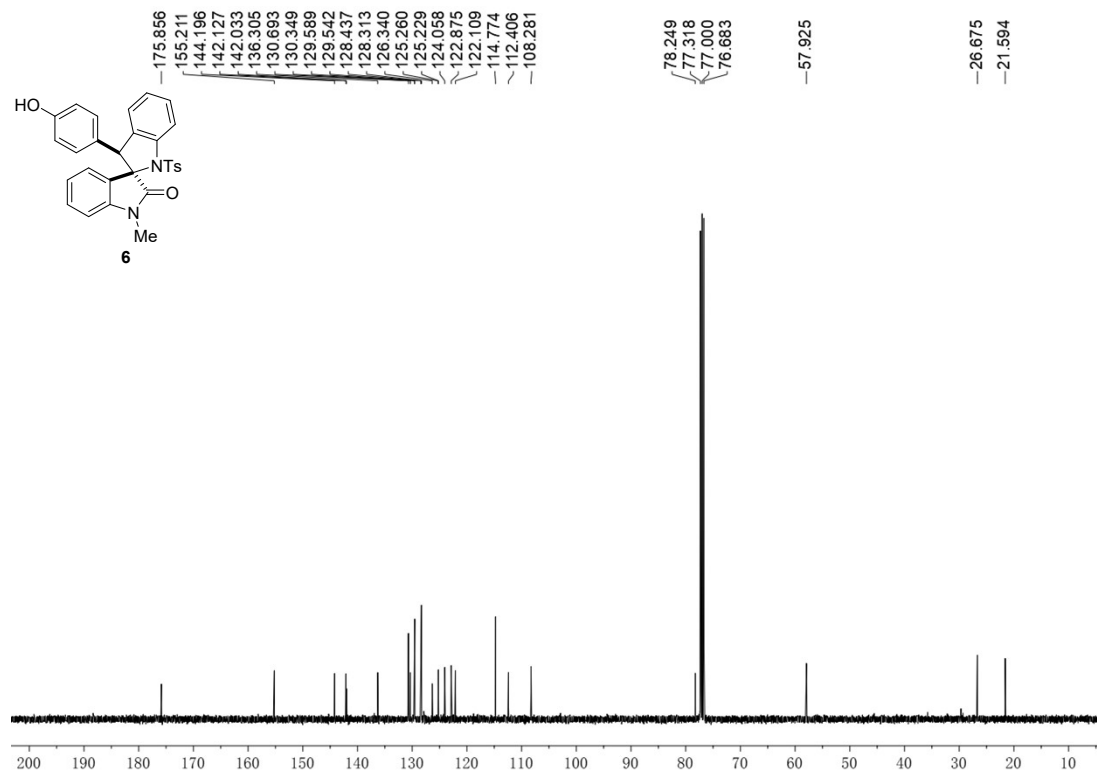

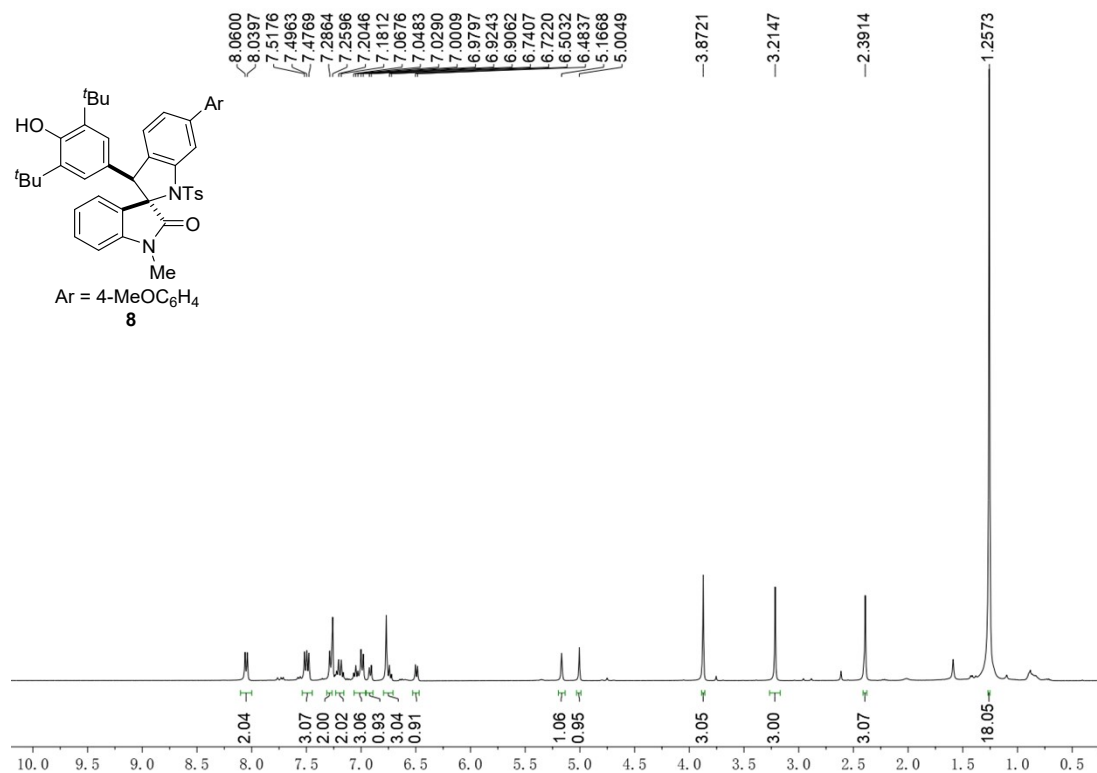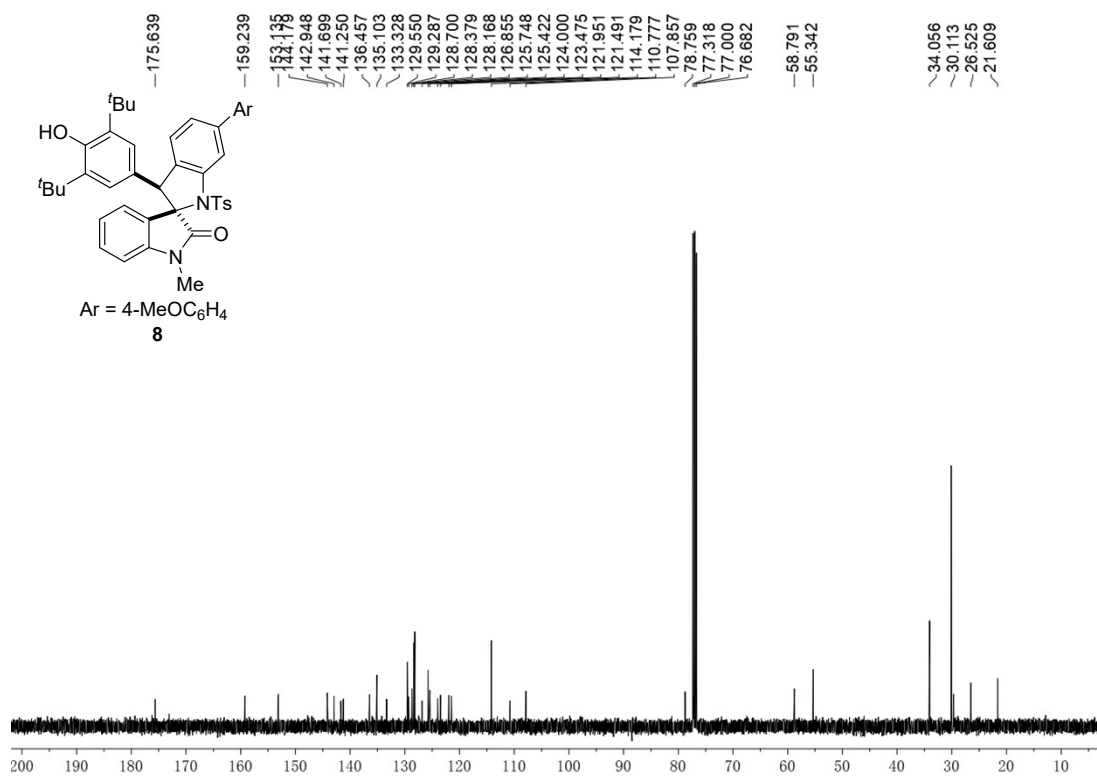

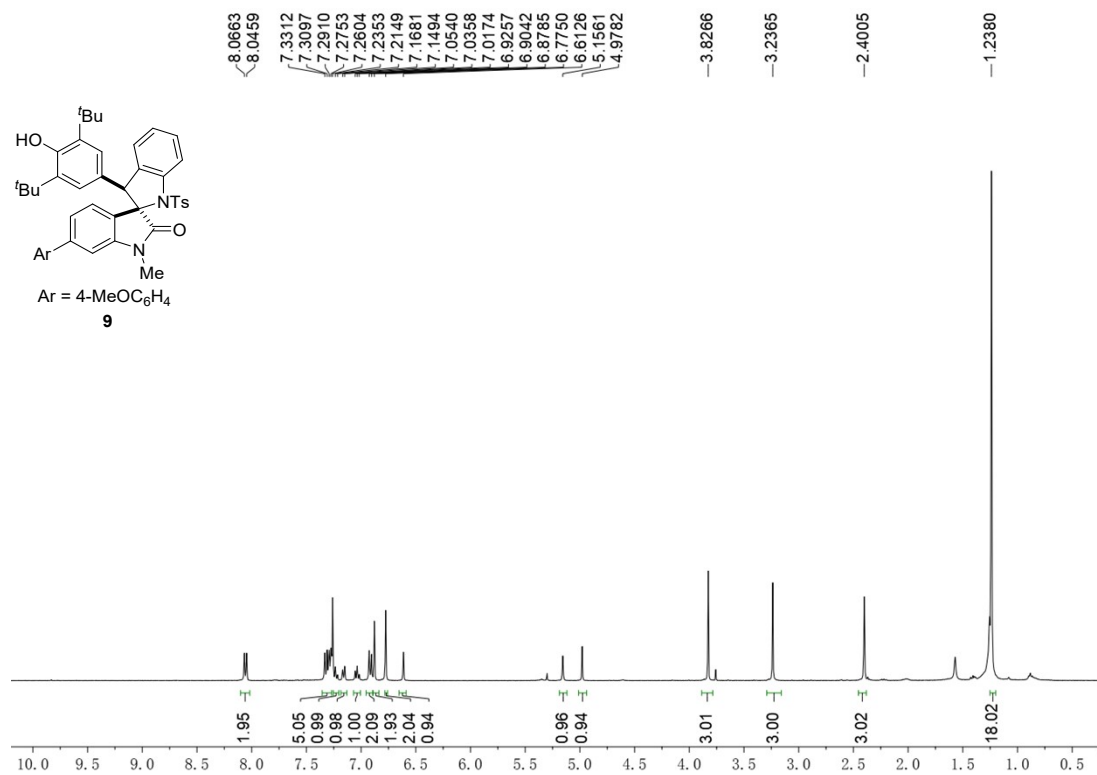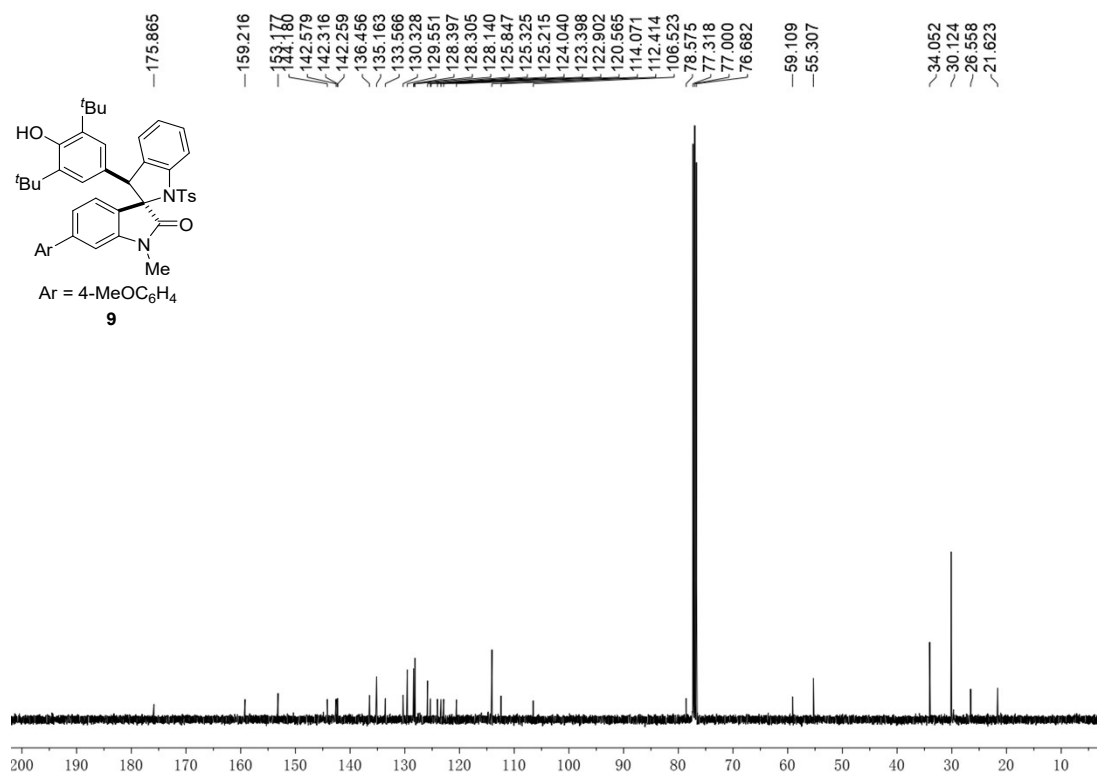

Supplement: d1qo01605a1.pdf [file d1qo01605a1.pdf]
